# Supplementary material for: Transcriptomic analysis of male and female Schistosoma mekongi adult worms
Source: PubMed Central journal article supplement (PMC6131826; doi:10.1186/s13071-018-3086-z), 2018-09-10

# **Additional file 1: Figure S1**

**Base quality distribution of raw reads  
and trimmed paired-end reads**

Male replicate 1\_R1: Base Quality Distribution

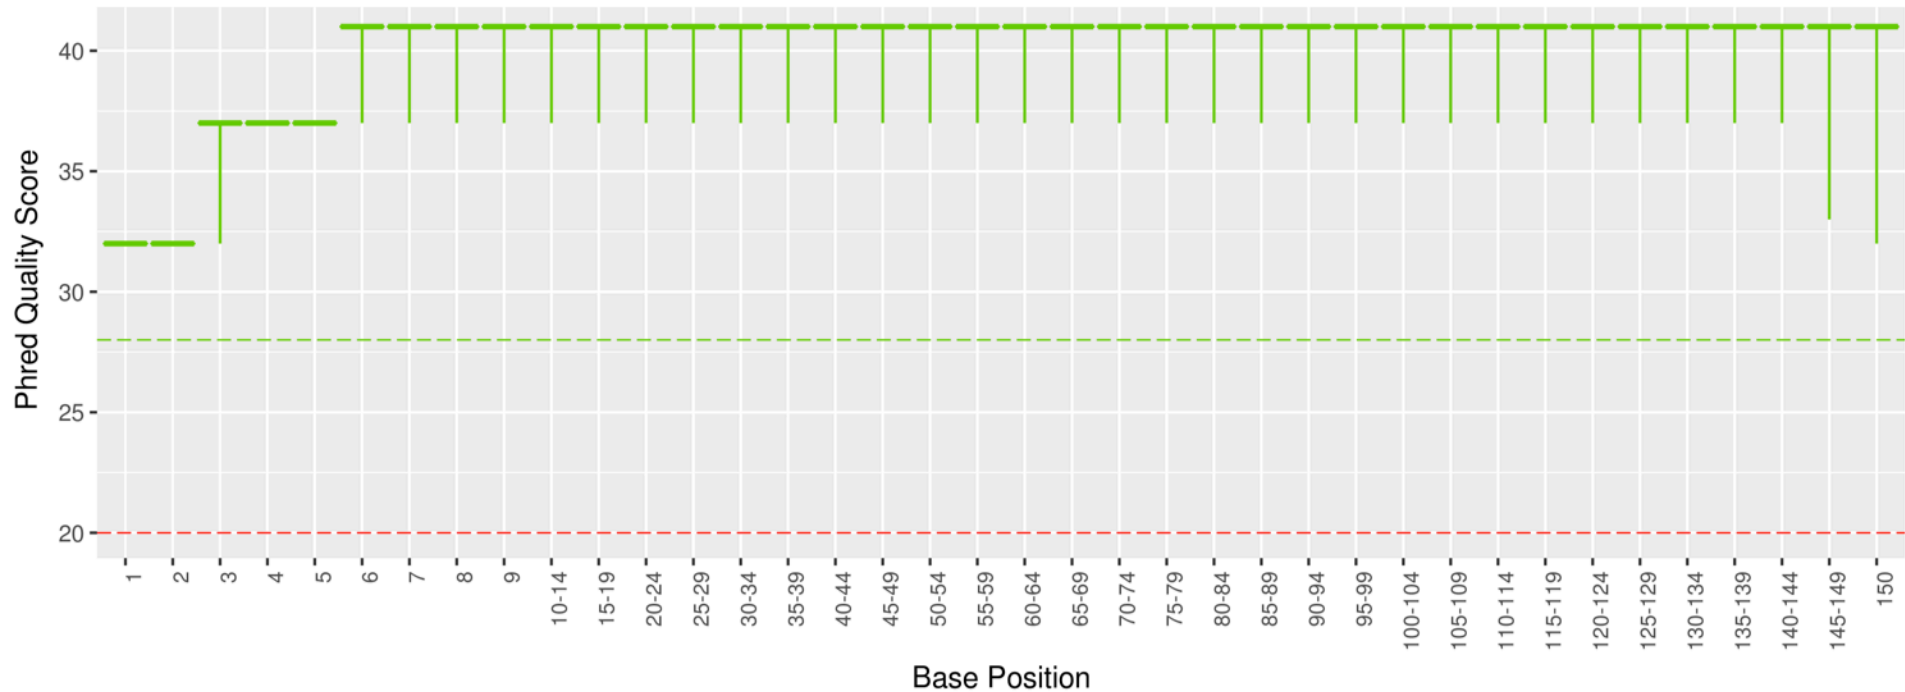

Male replicate 1\_R2: Base Quality Distribution

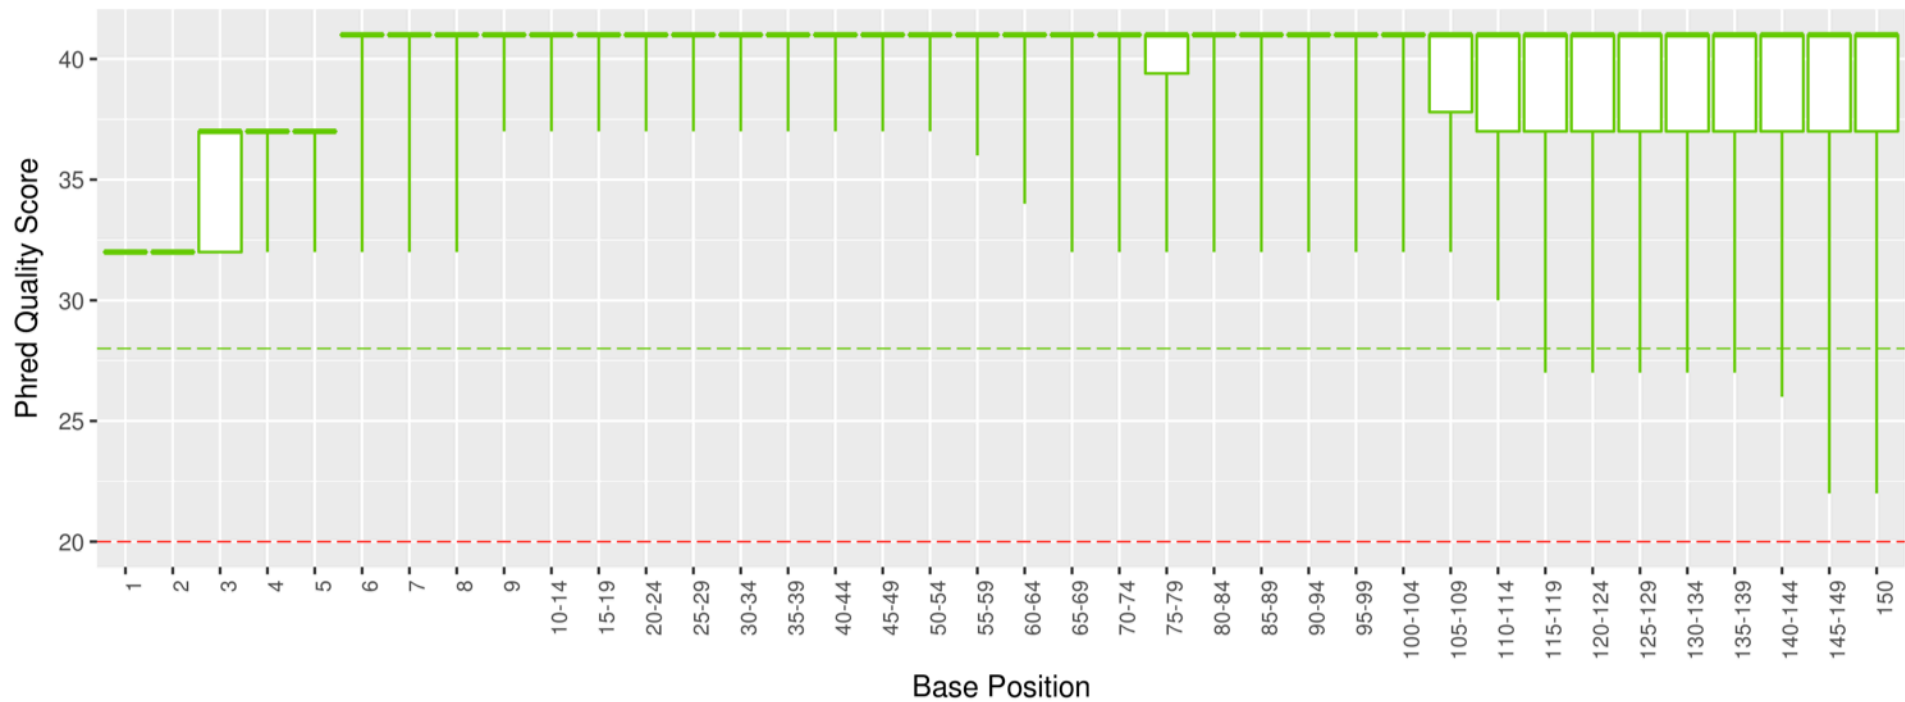

Male replicate 2\_R1: Base Quality Distribution

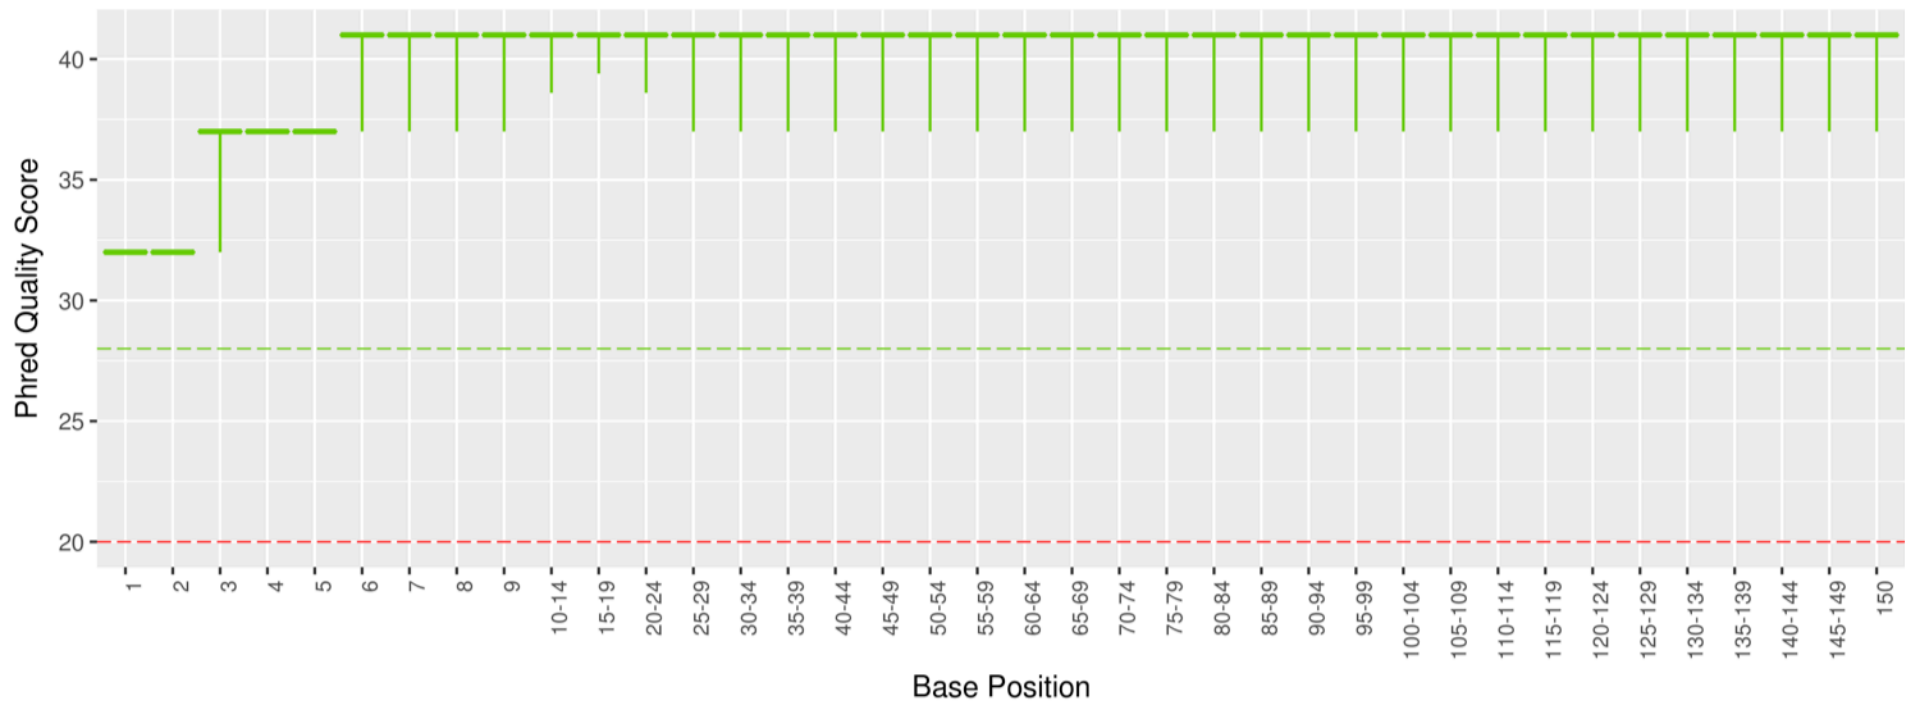

Male replicate 2\_R2: Base Quality Distribution

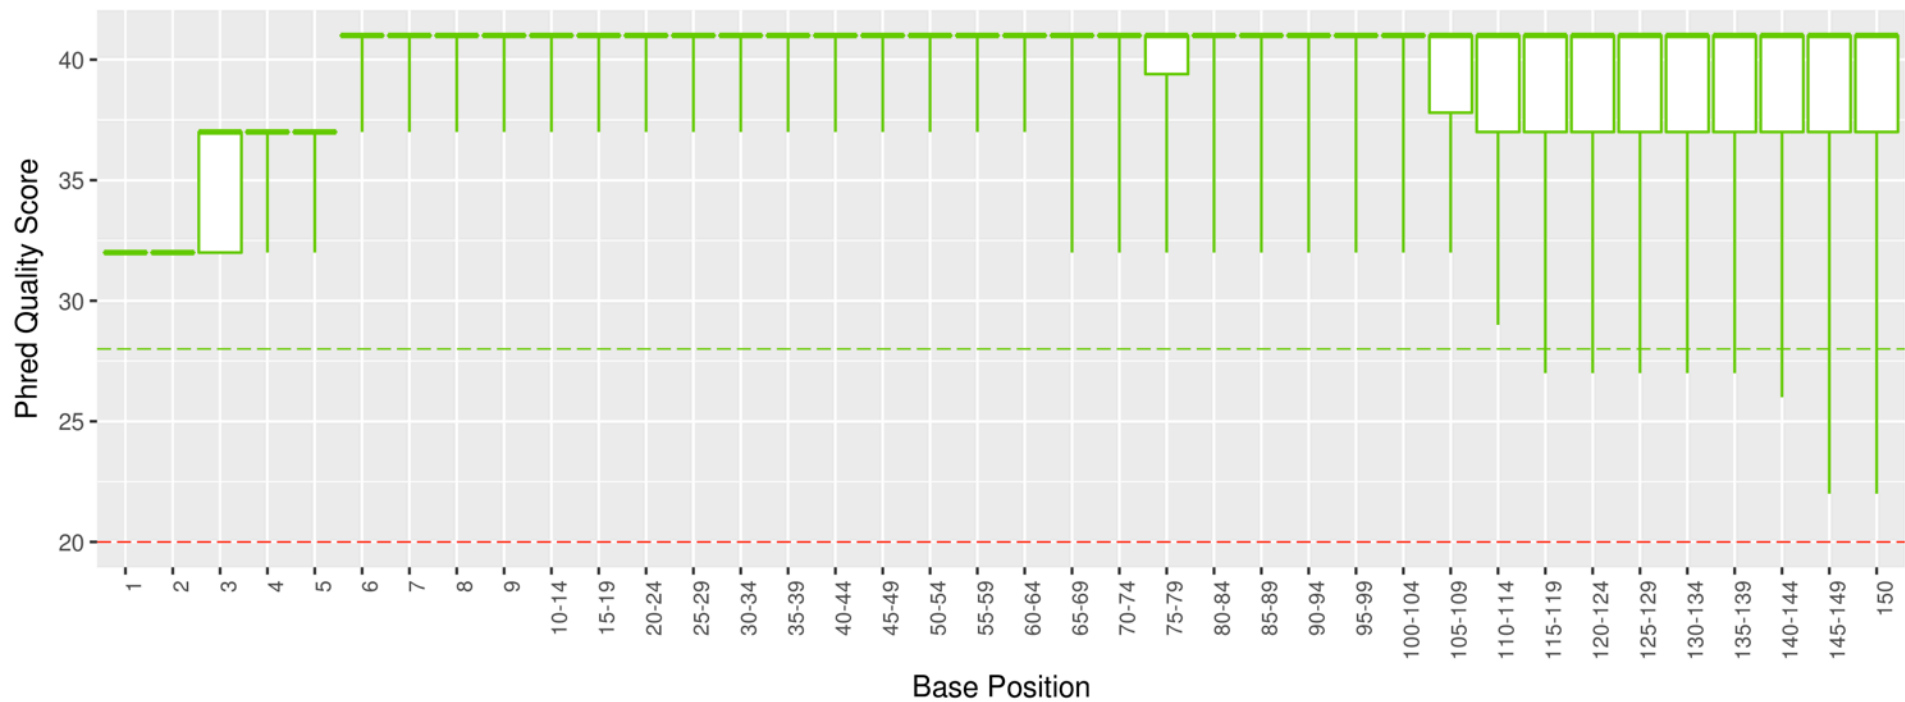

Male replicate 3\_R1: Base Quality Distribution

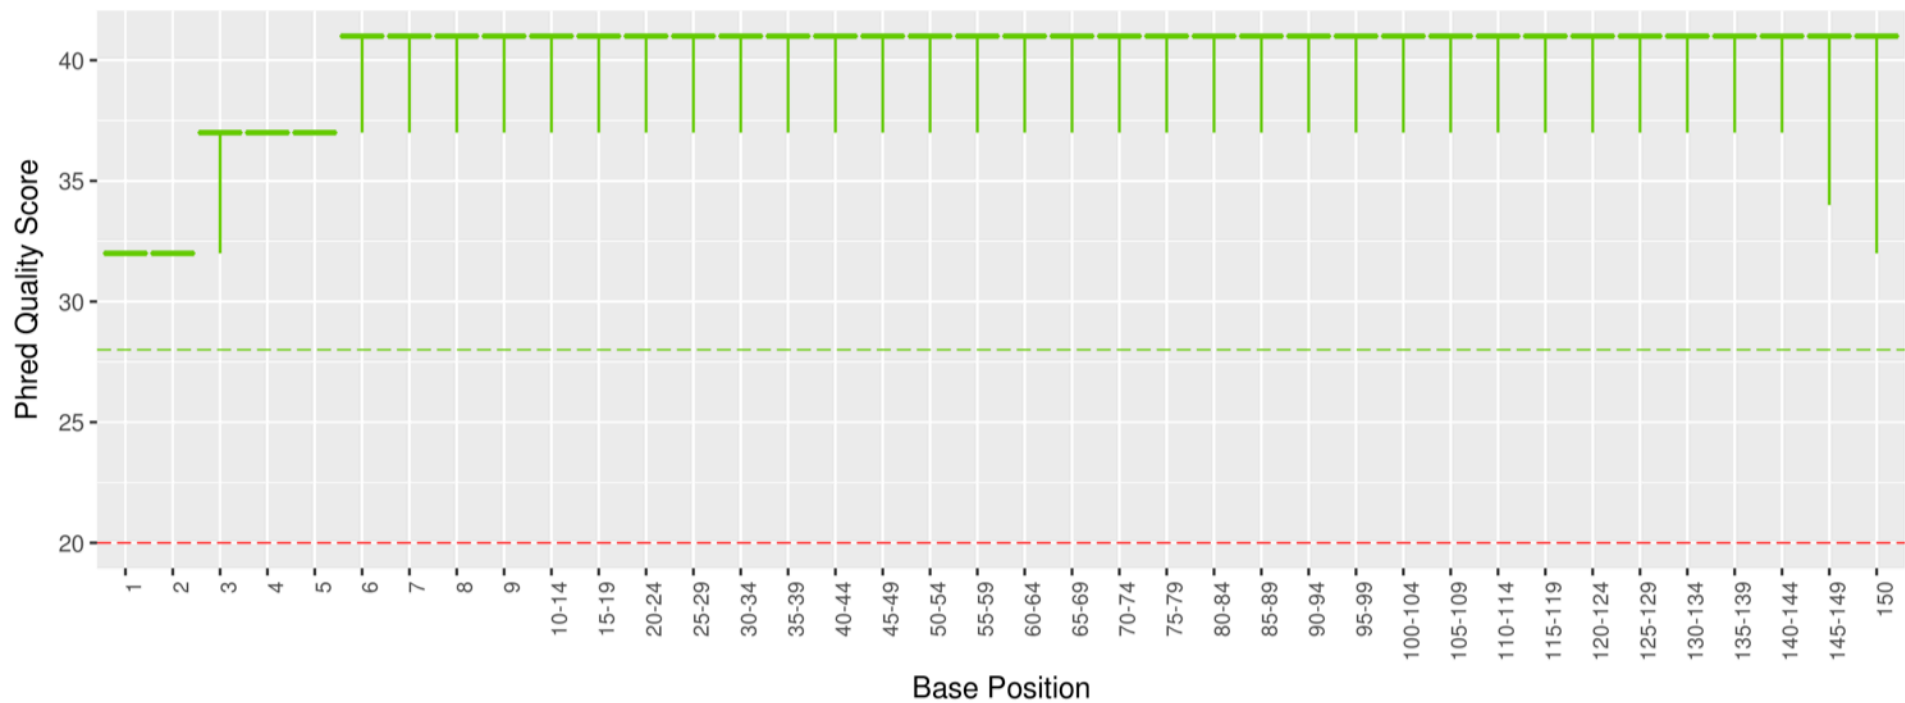

Male replicate 3\_R2: Base Quality Distribution

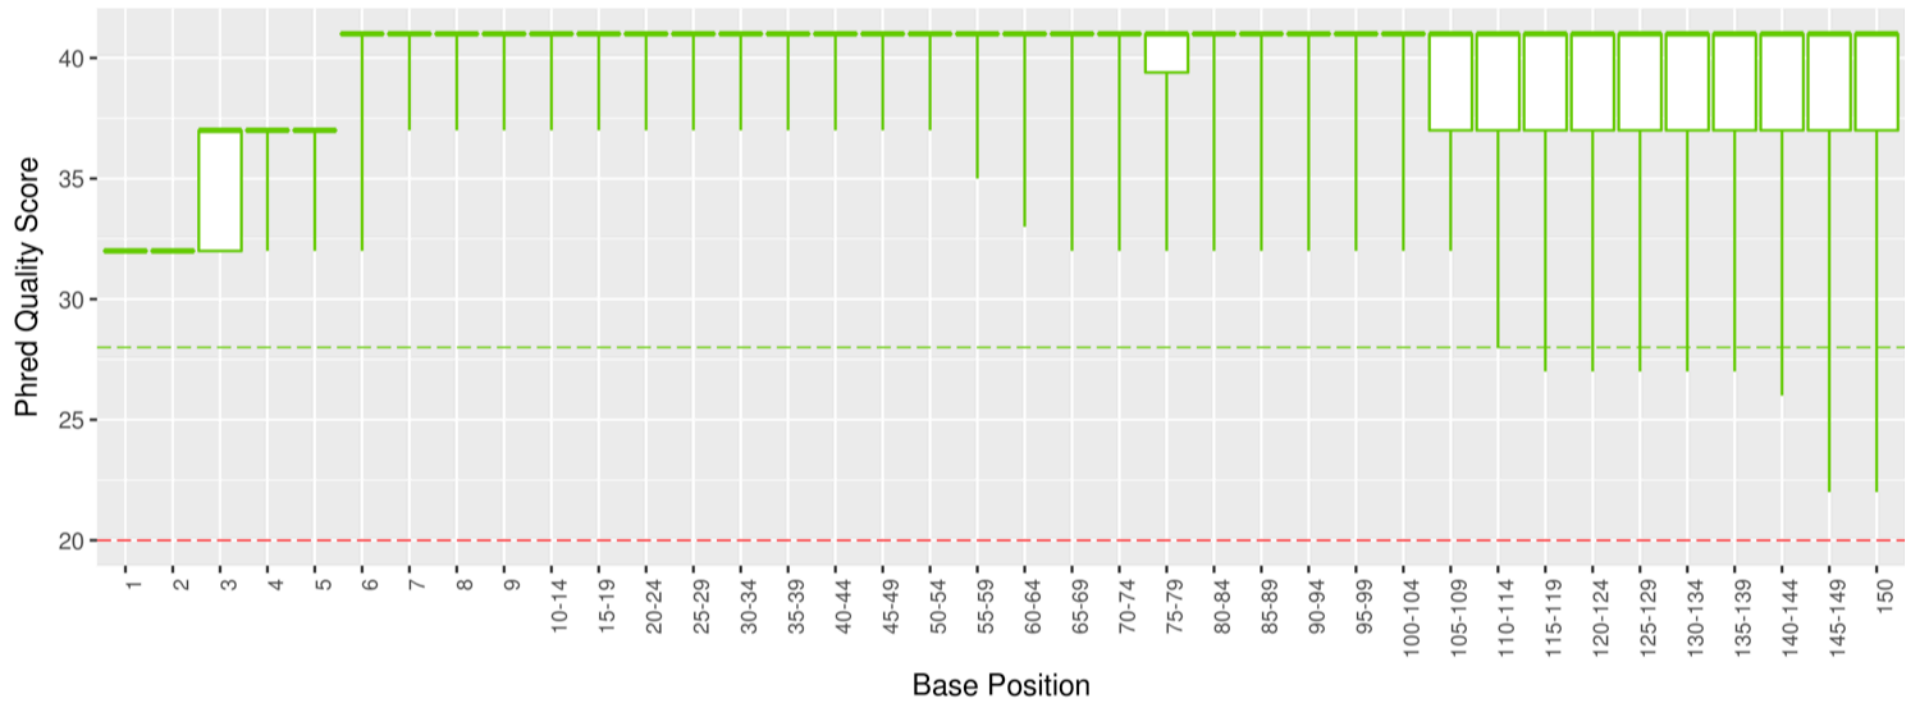

Female replicate 1\_R1: Base Quality Distribution

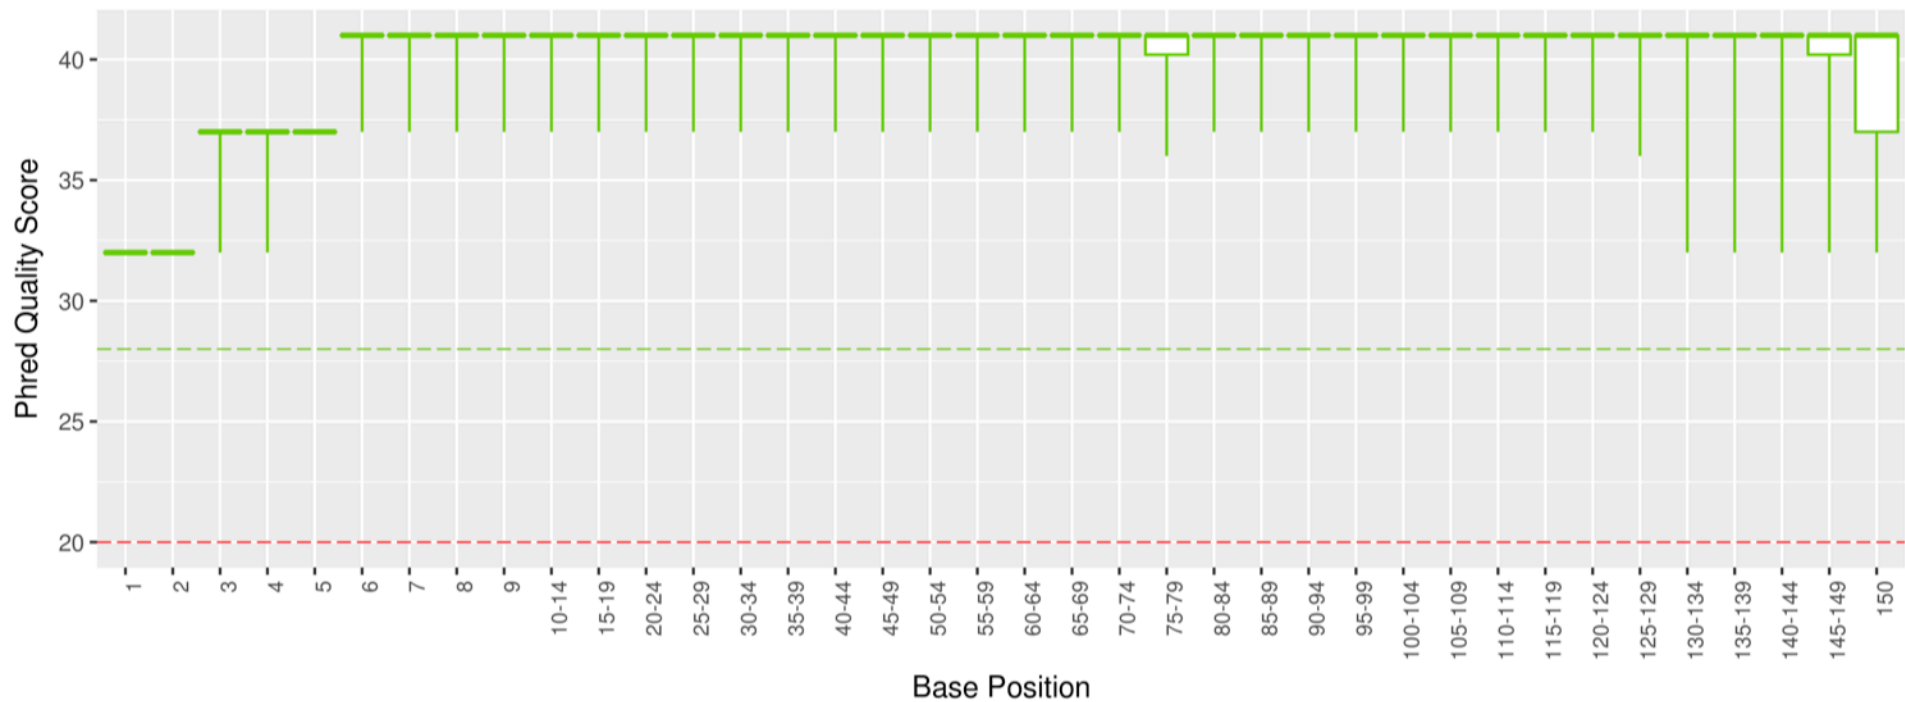



Female replicate 1\_R2: Base Quality Distribution

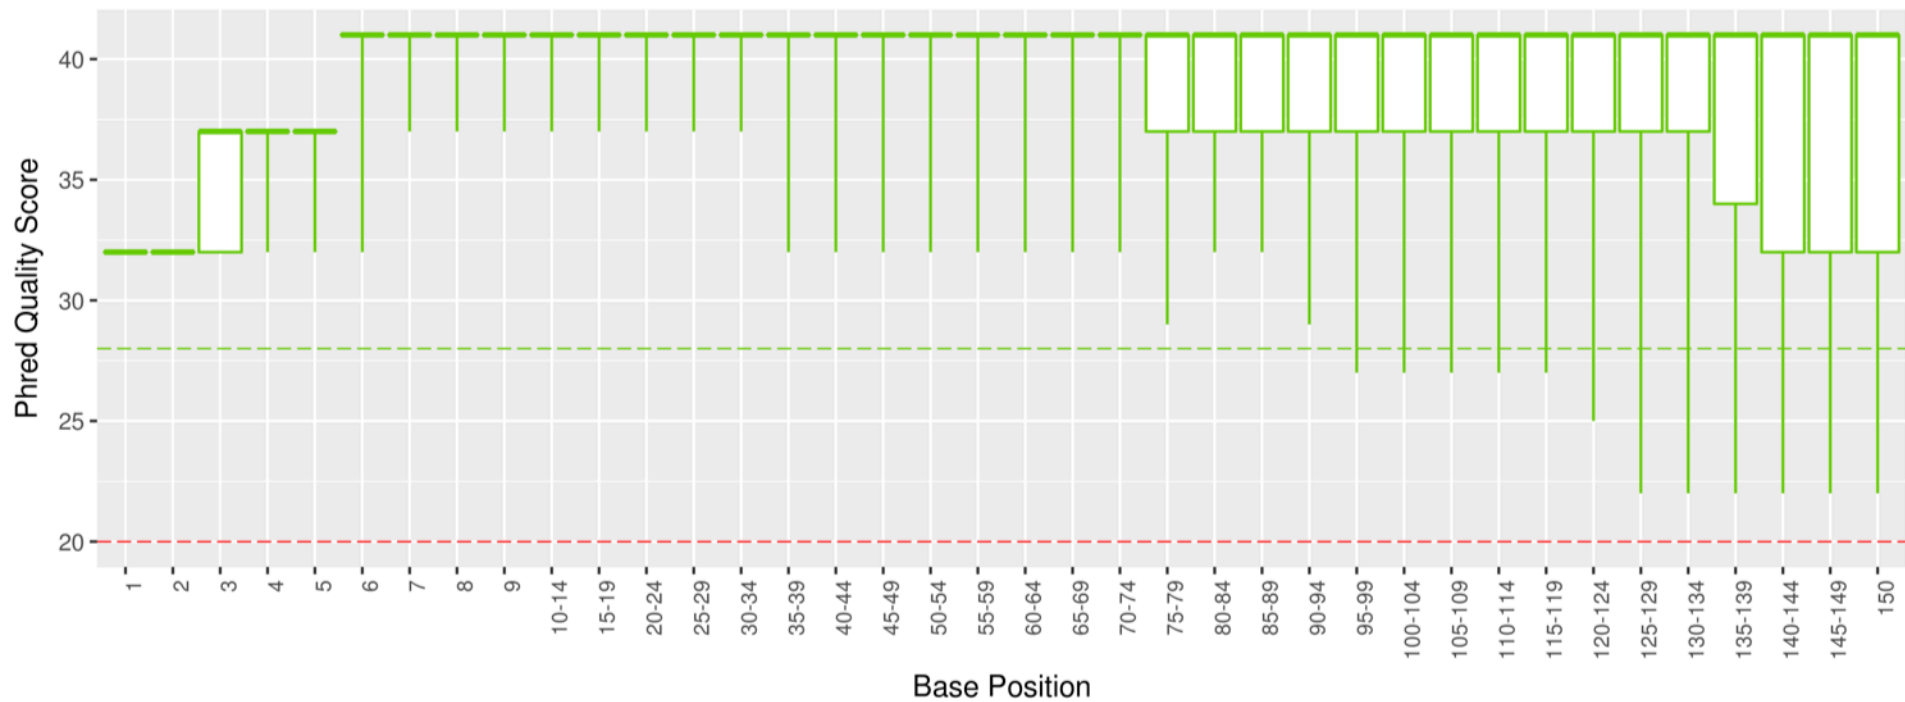

Female replicate 2\_R1: Base Quality Distribution

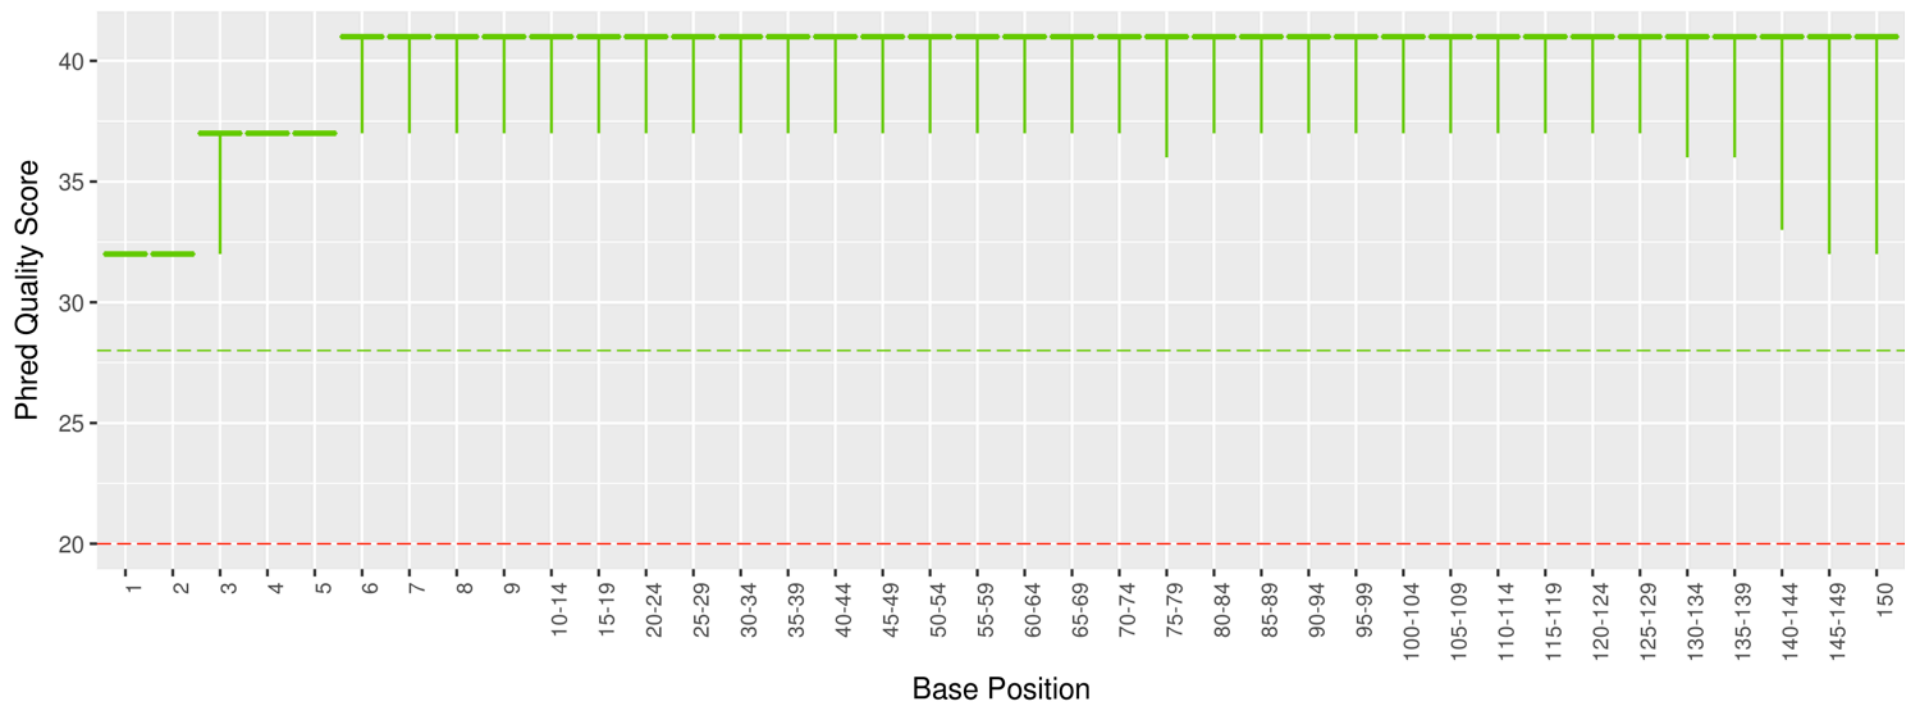

Female replicate 2\_R2: Base Quality Distribution

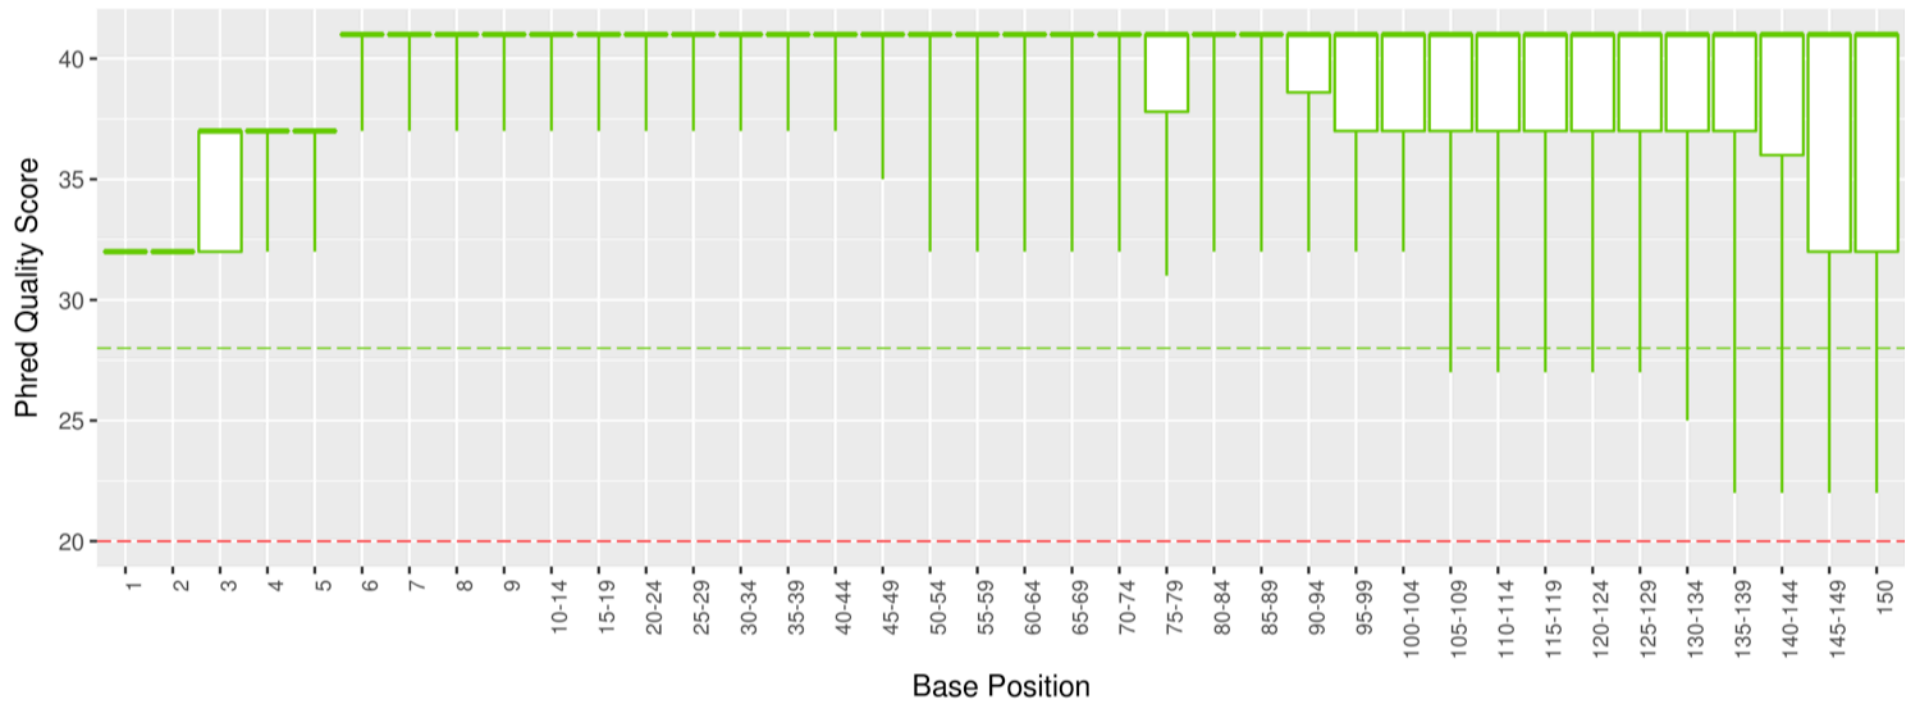

## Female replicate 3\_R1: Base Quality Distribution

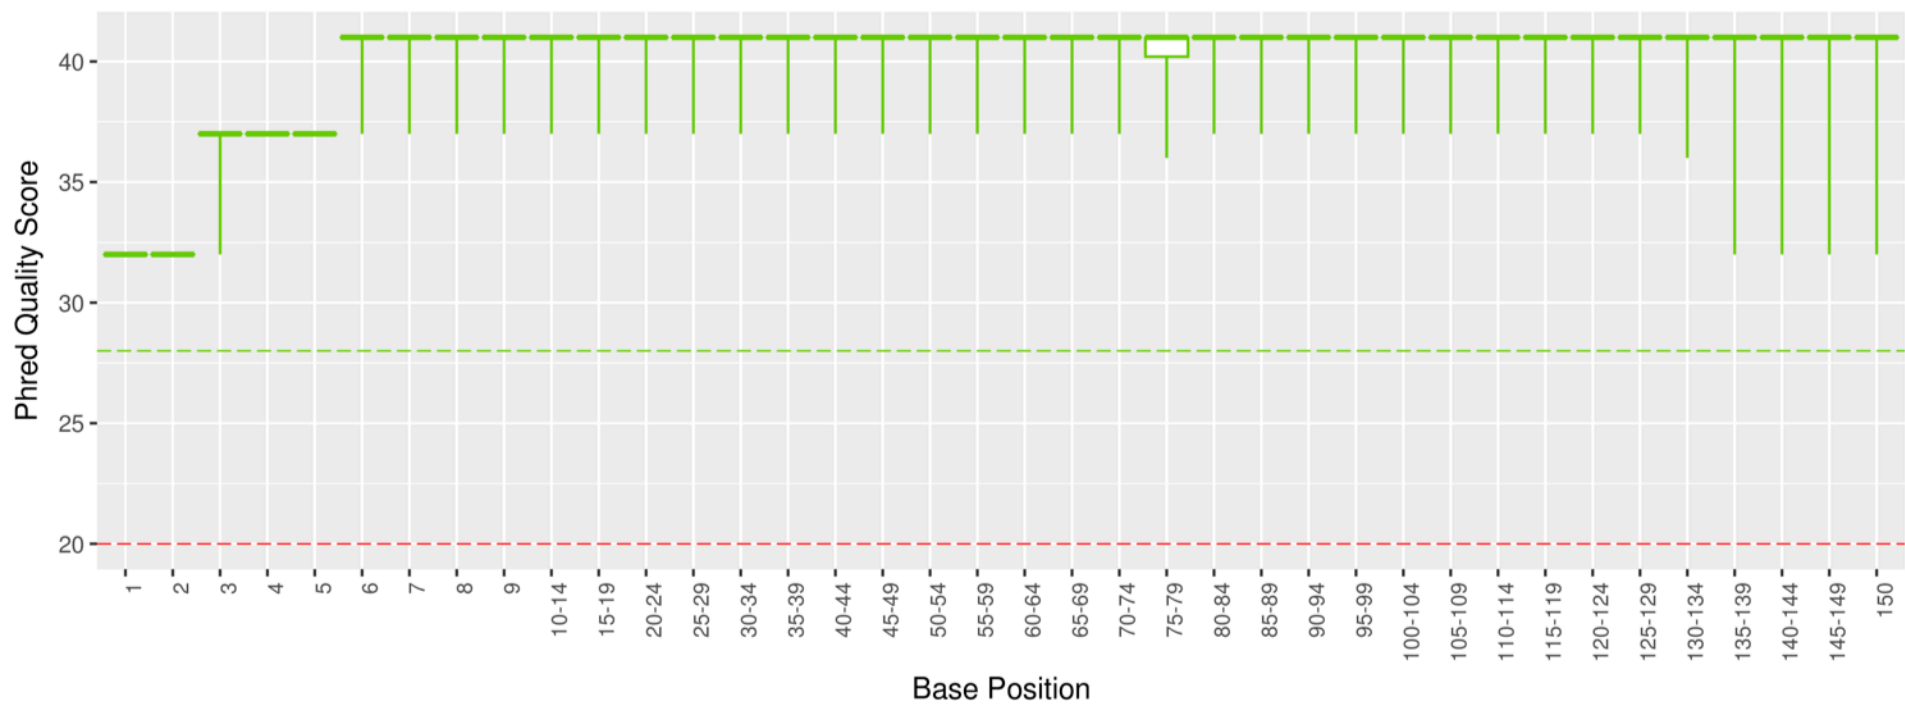

Female replicate 3\_R2: Base Quality Distribution

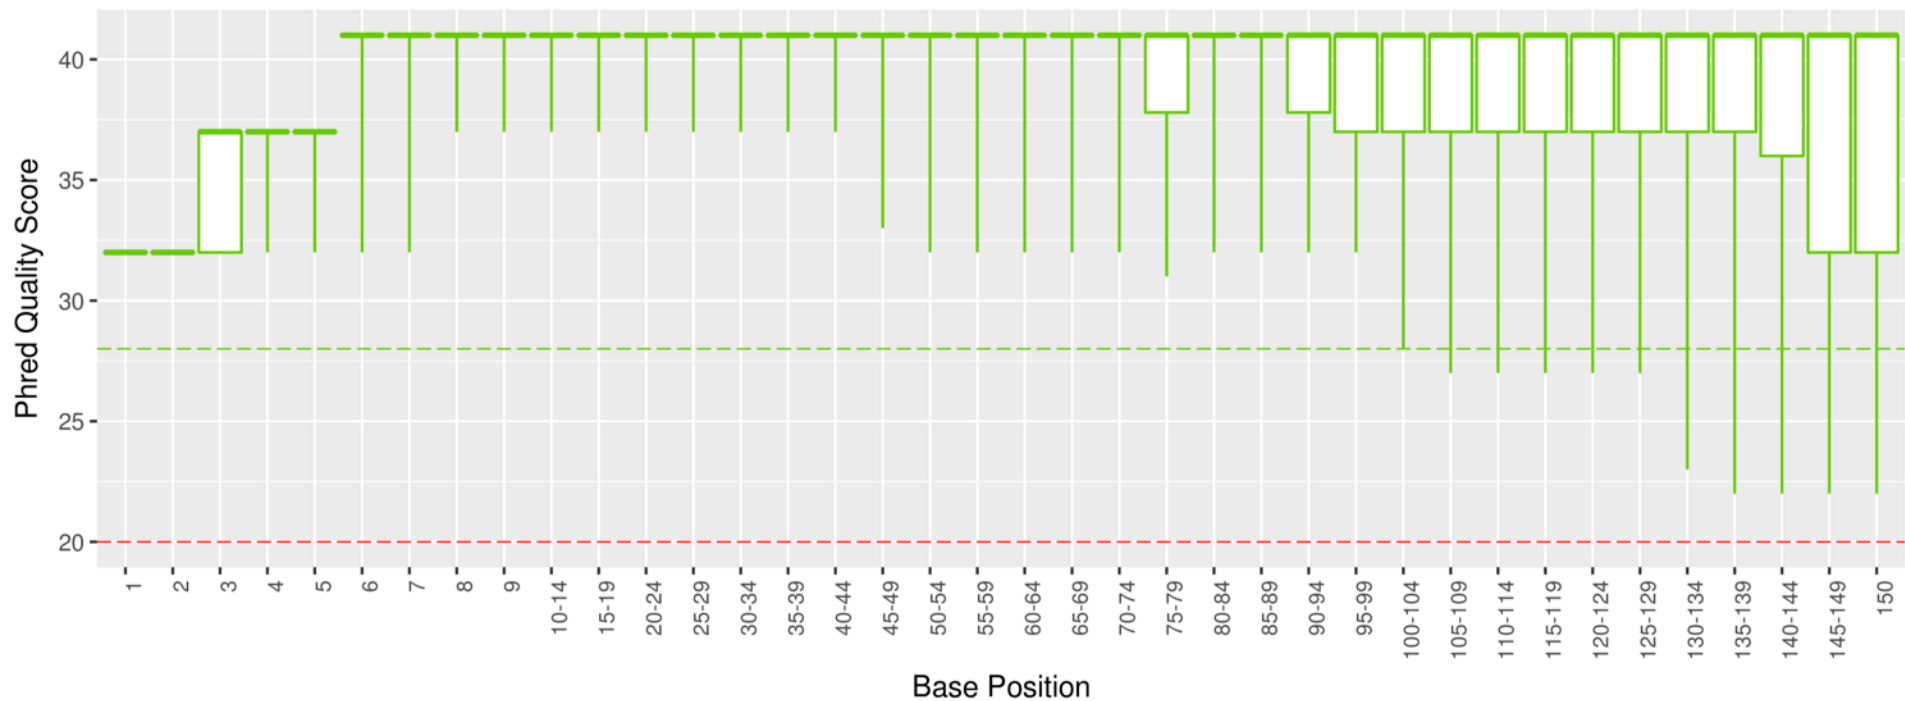

# Trimmed Read Quality

Male replicate 1\_R1-paired: Base Quality Distribution

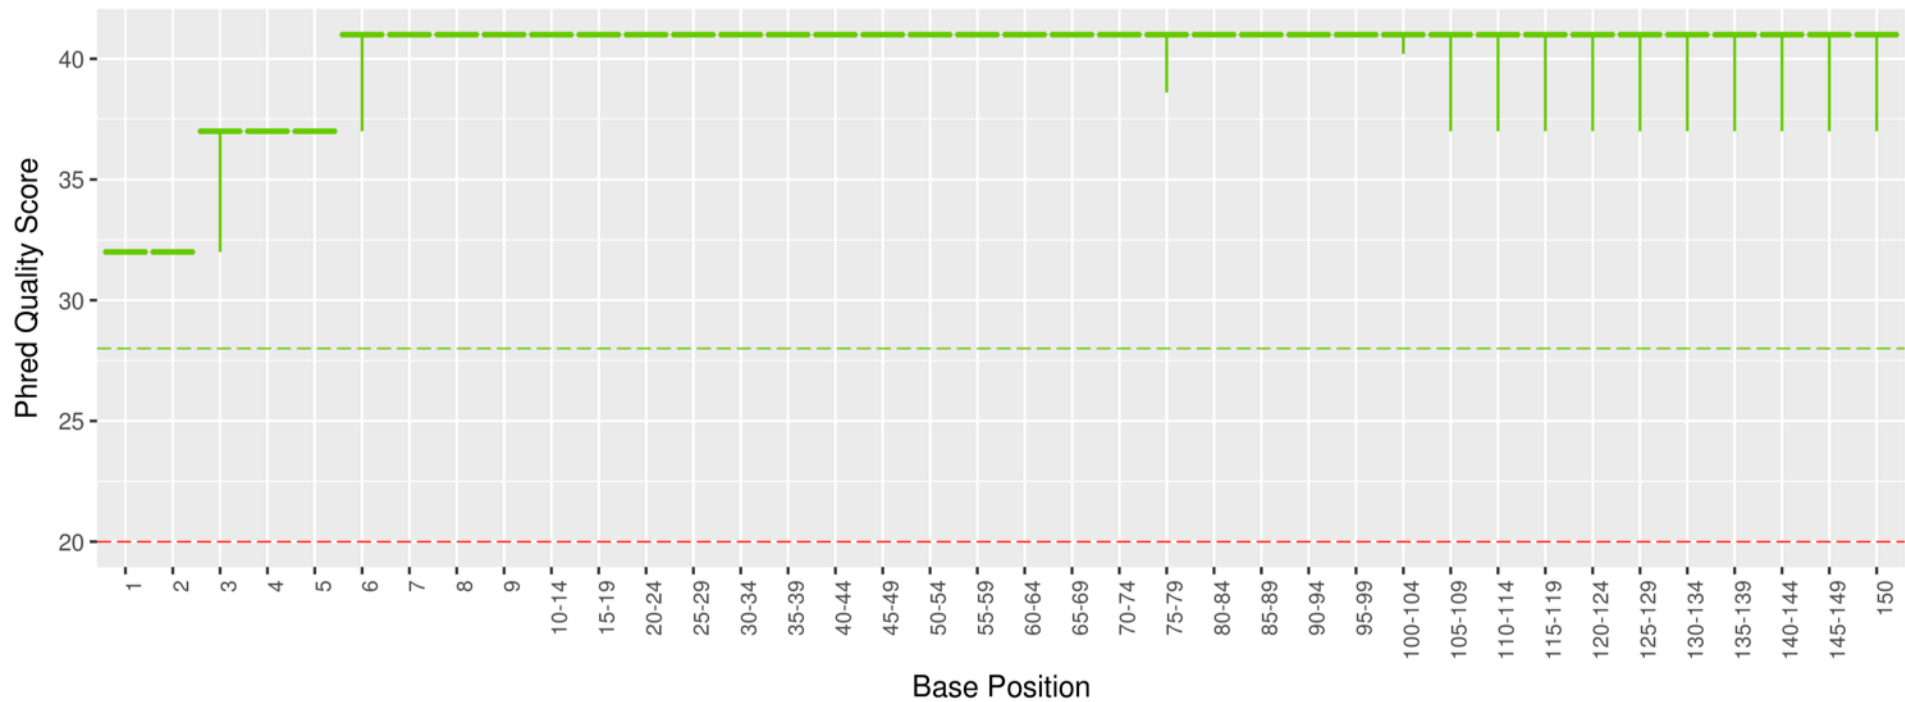

Male replicate 1\_R2-paired: Base Quality Distribution

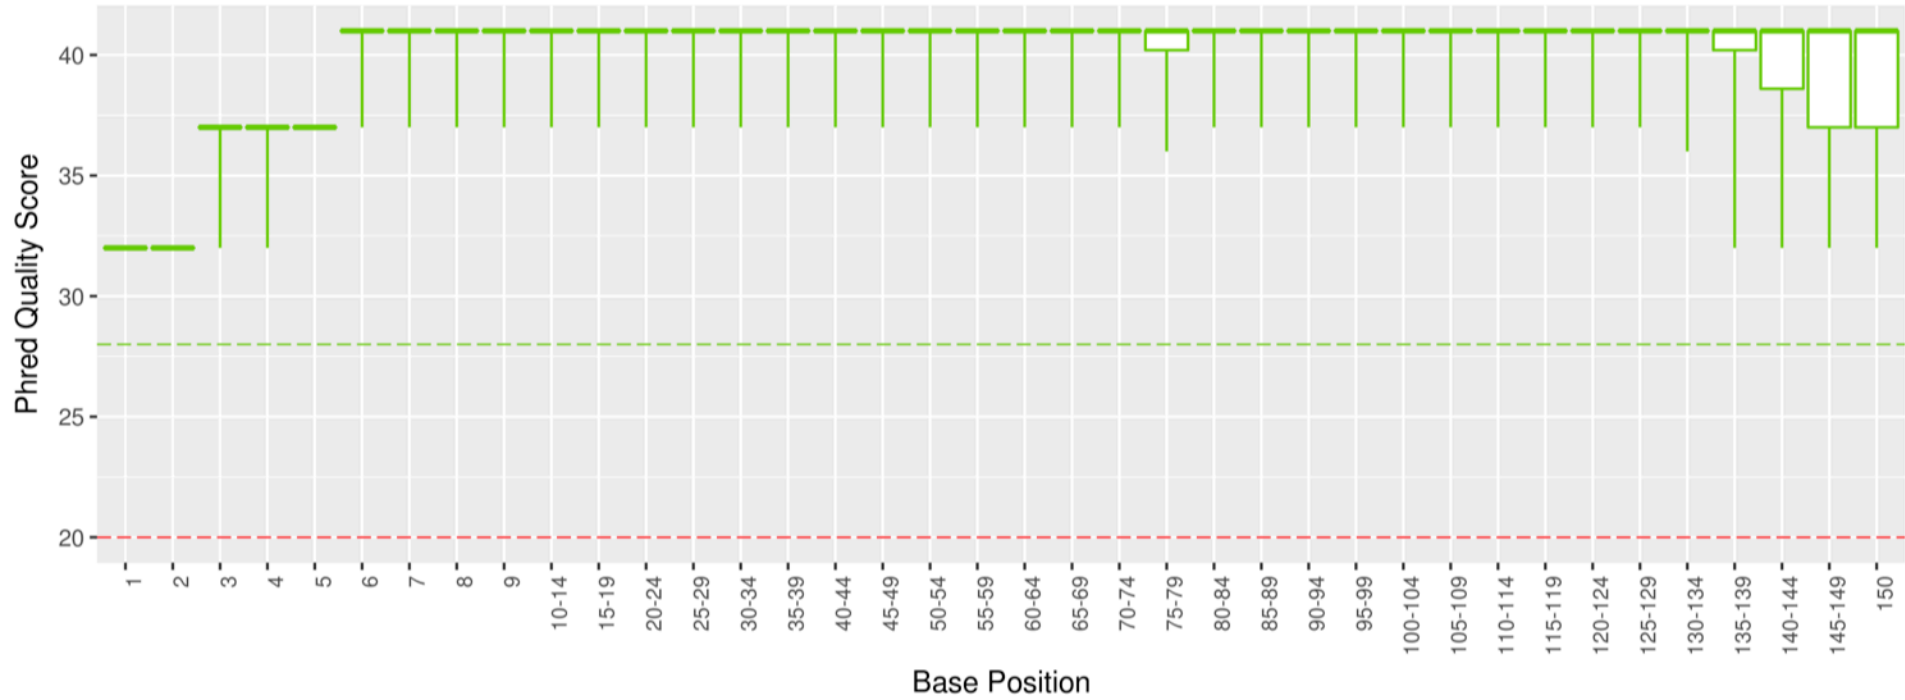



Male replicate 2\_R1-paired: Base Quality Distribution

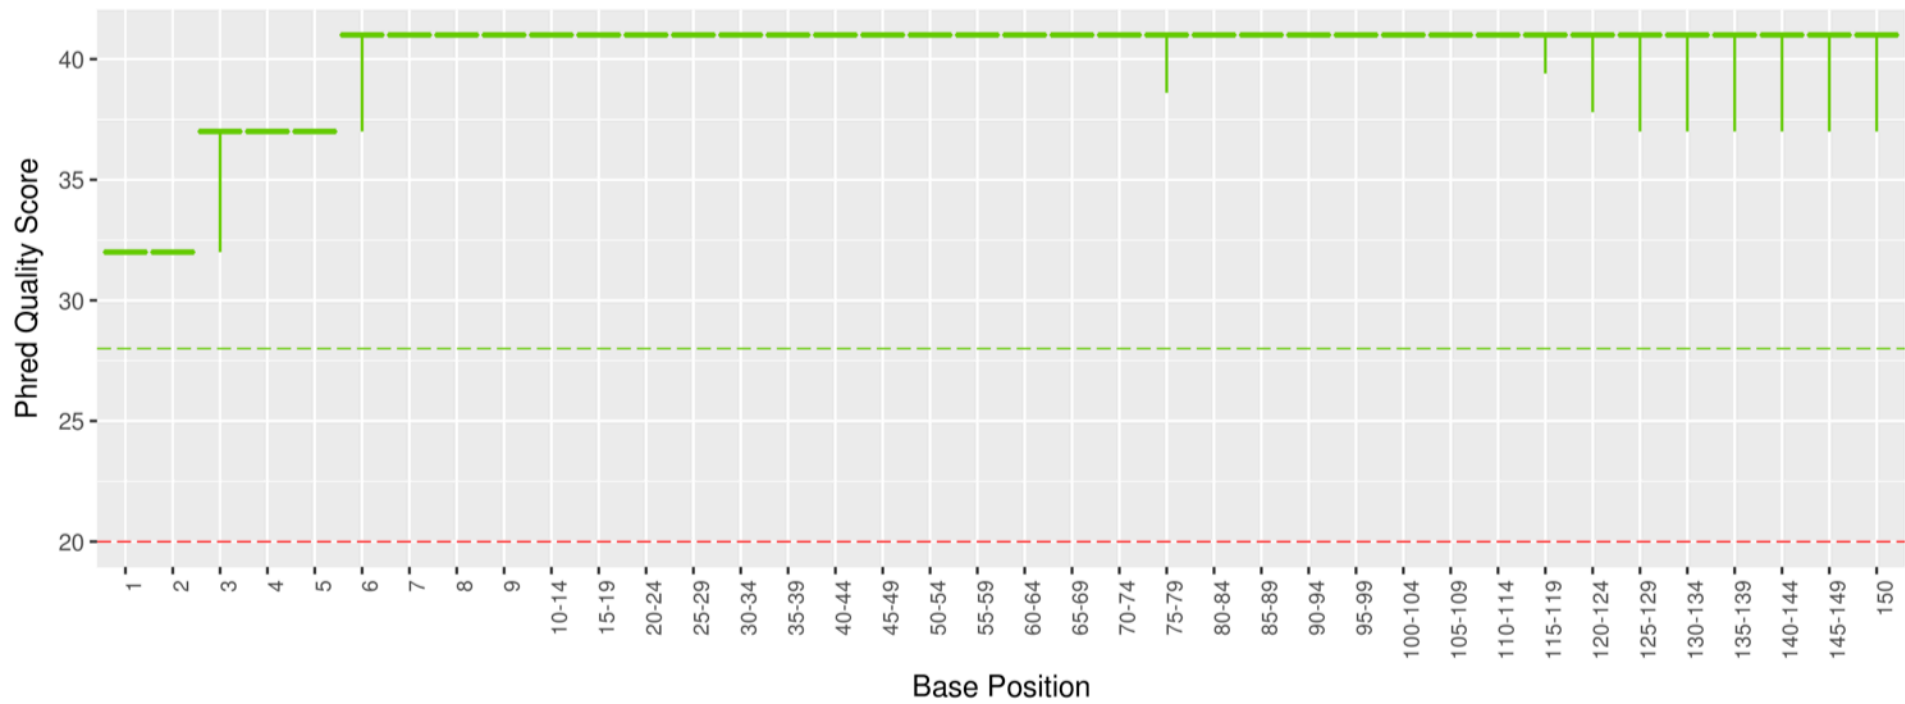

Male replicate 2\_R2-paired: Base Quality Distribution

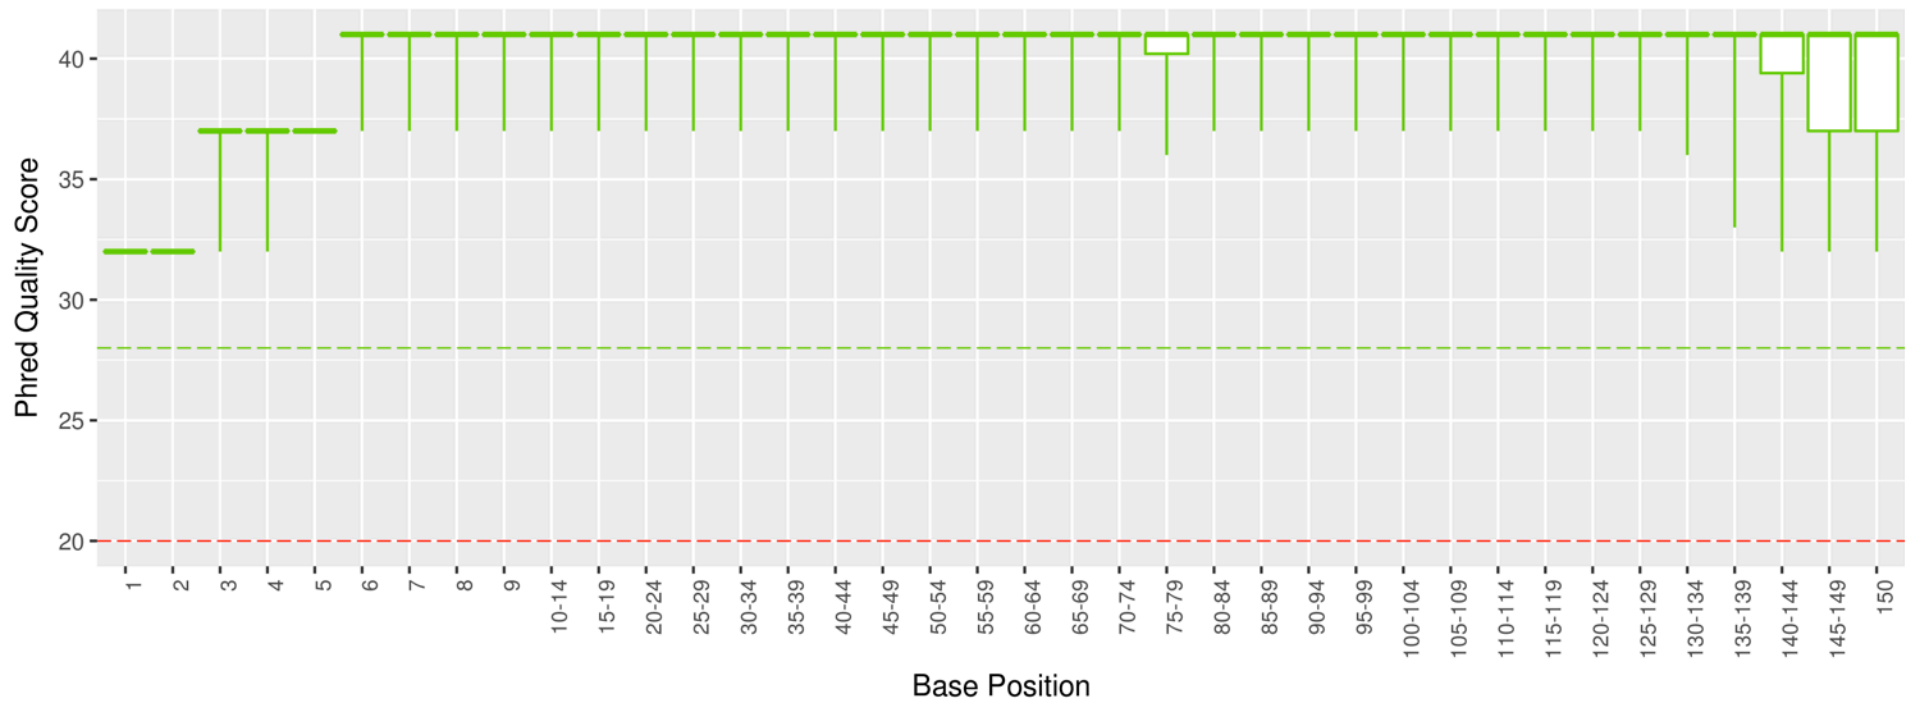

Male replicate 3\_R1-paired: Base Quality Distribution

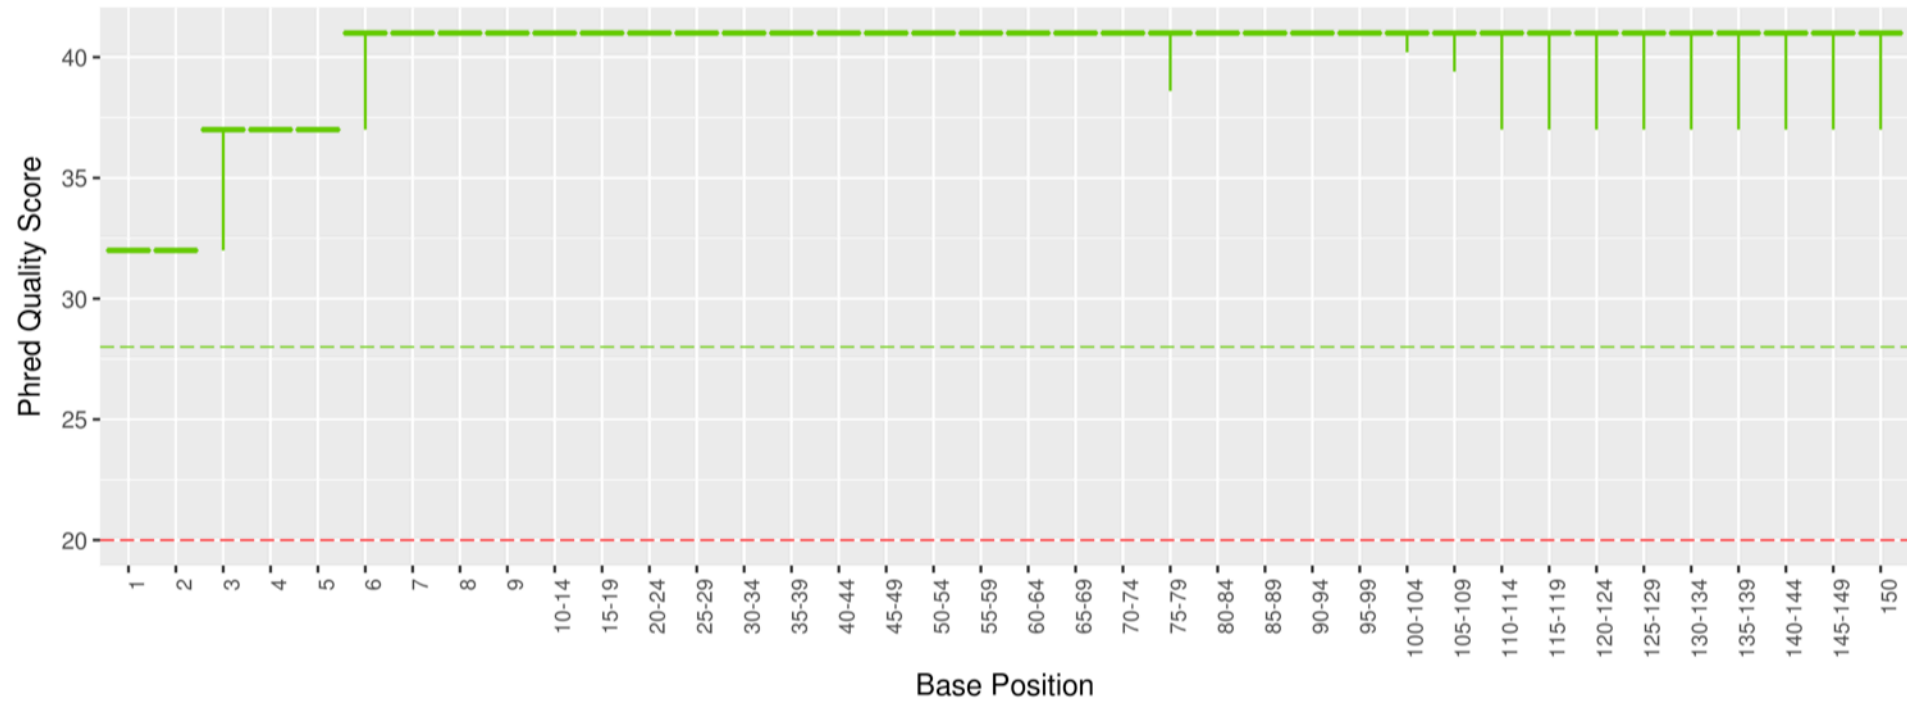

Male replicate 3\_R2-paired: Base Quality Distribution

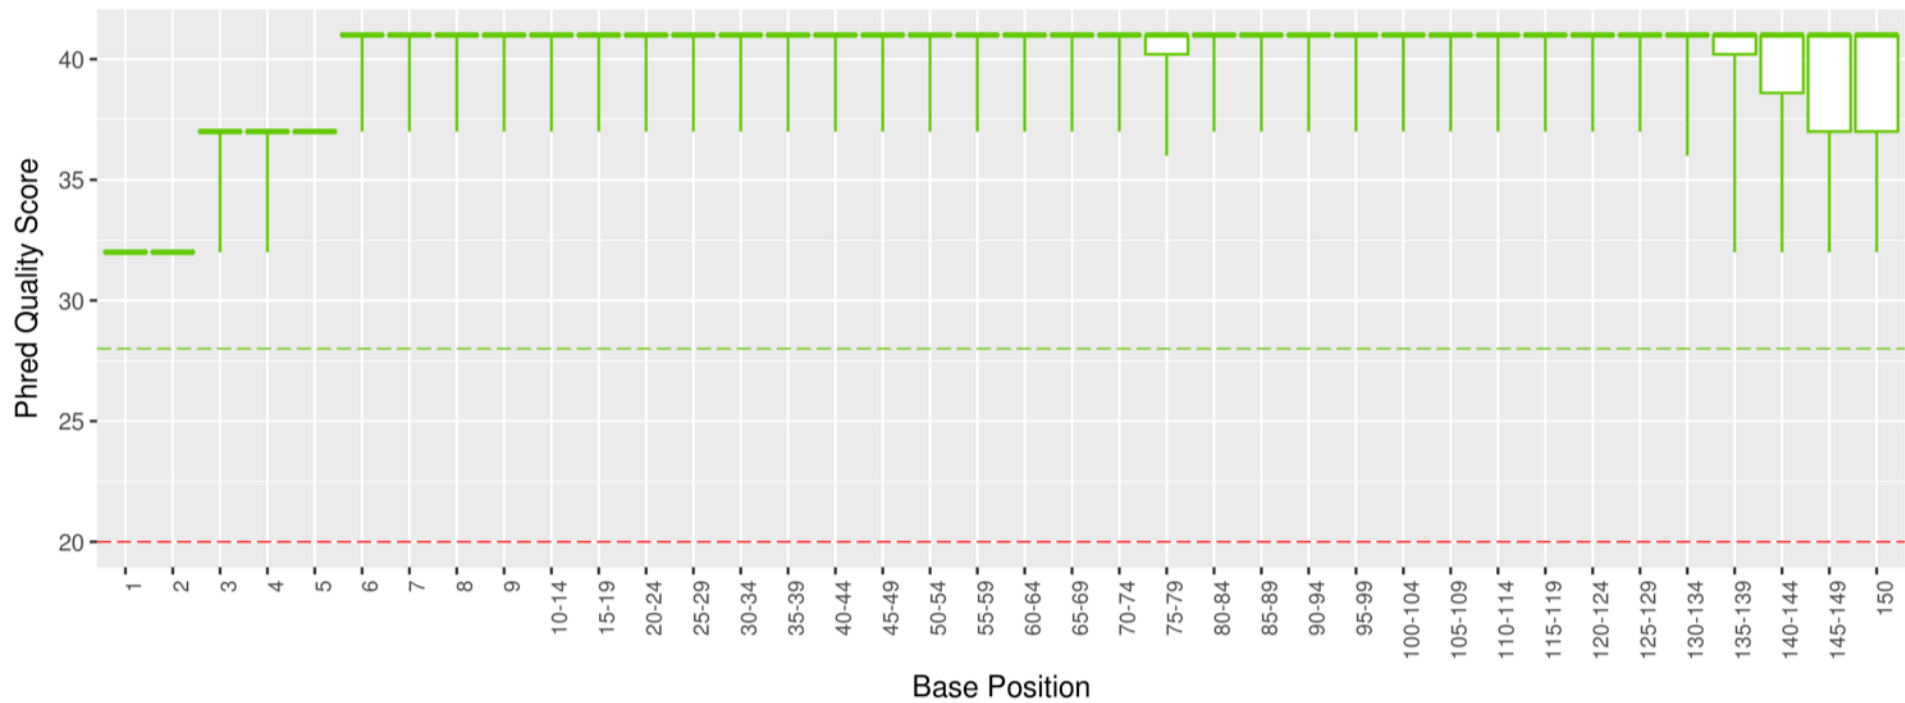

Female replicate 1\_R1-paired: Base Quality Distribution

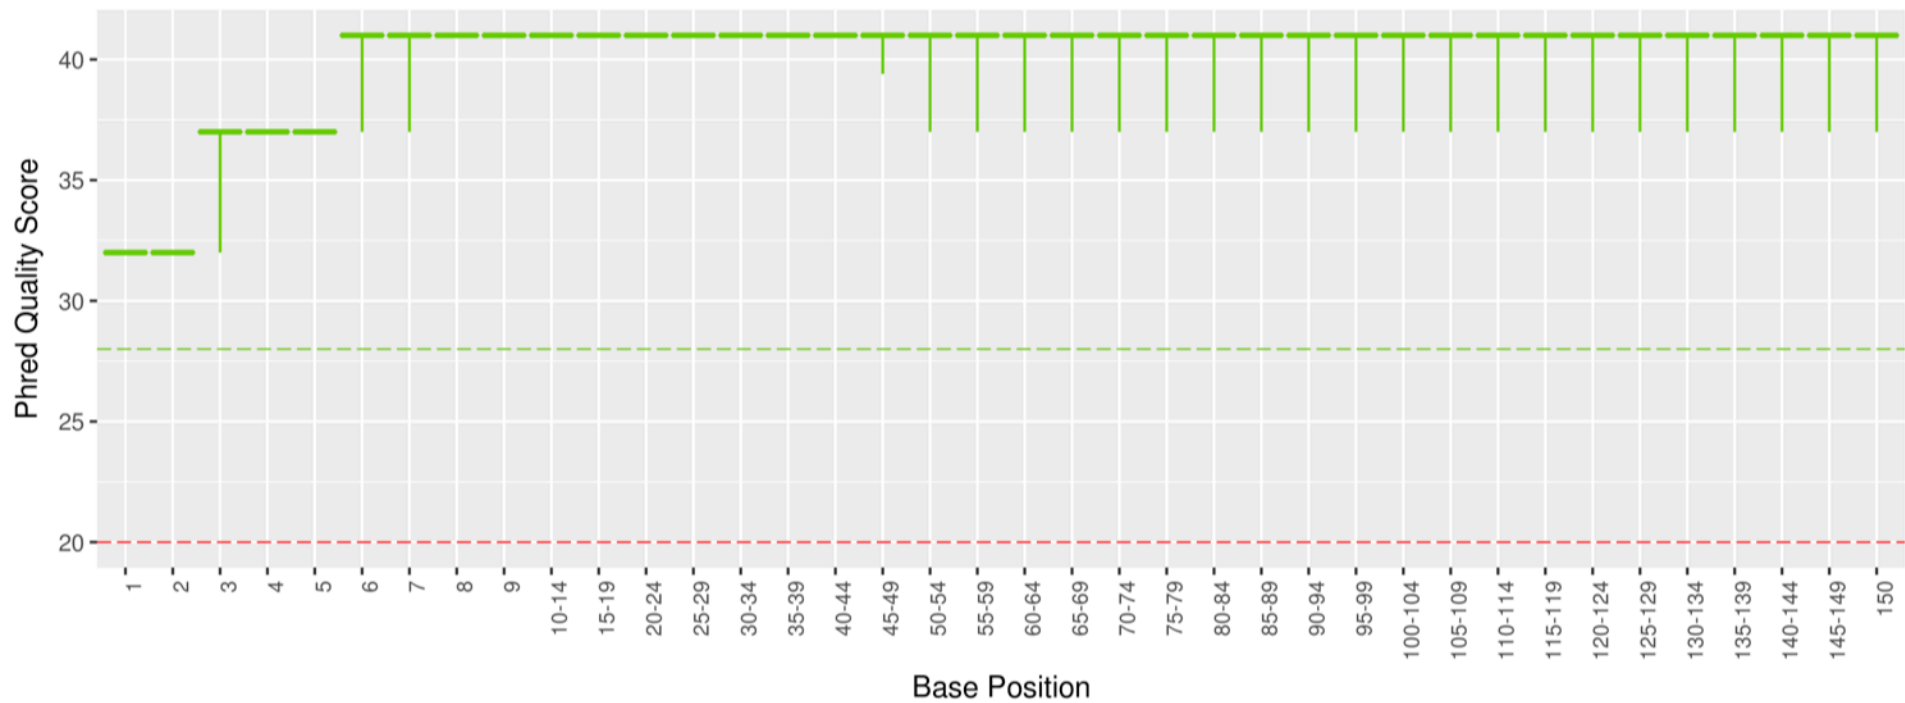

Female replicate 1\_R2-paired: Base Quality Distribution

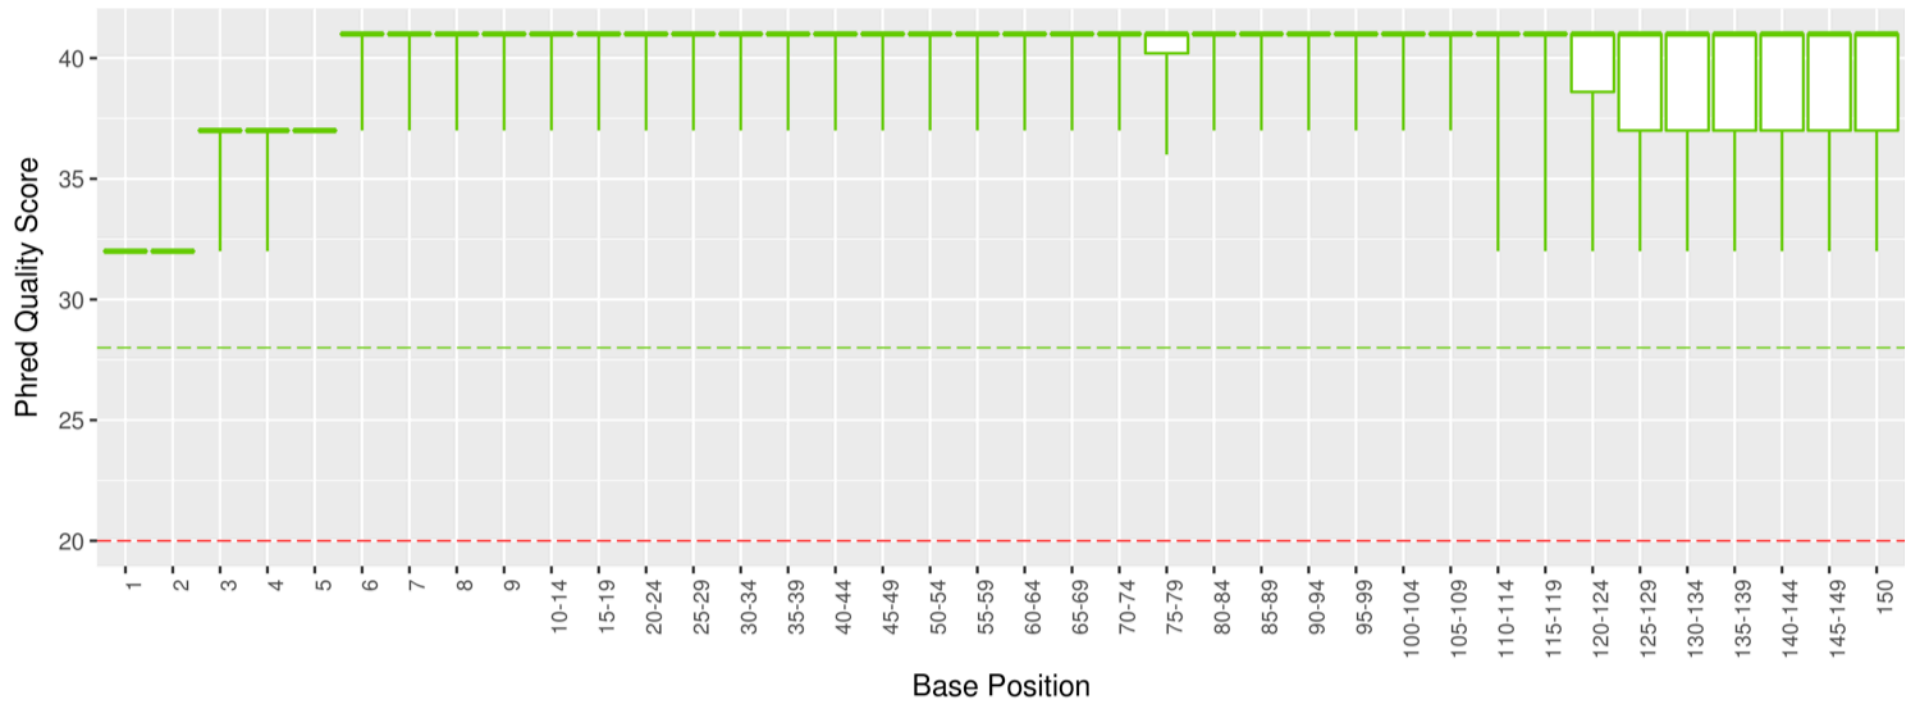

Female replicate 2\_R1-paired: Base Quality Distribution

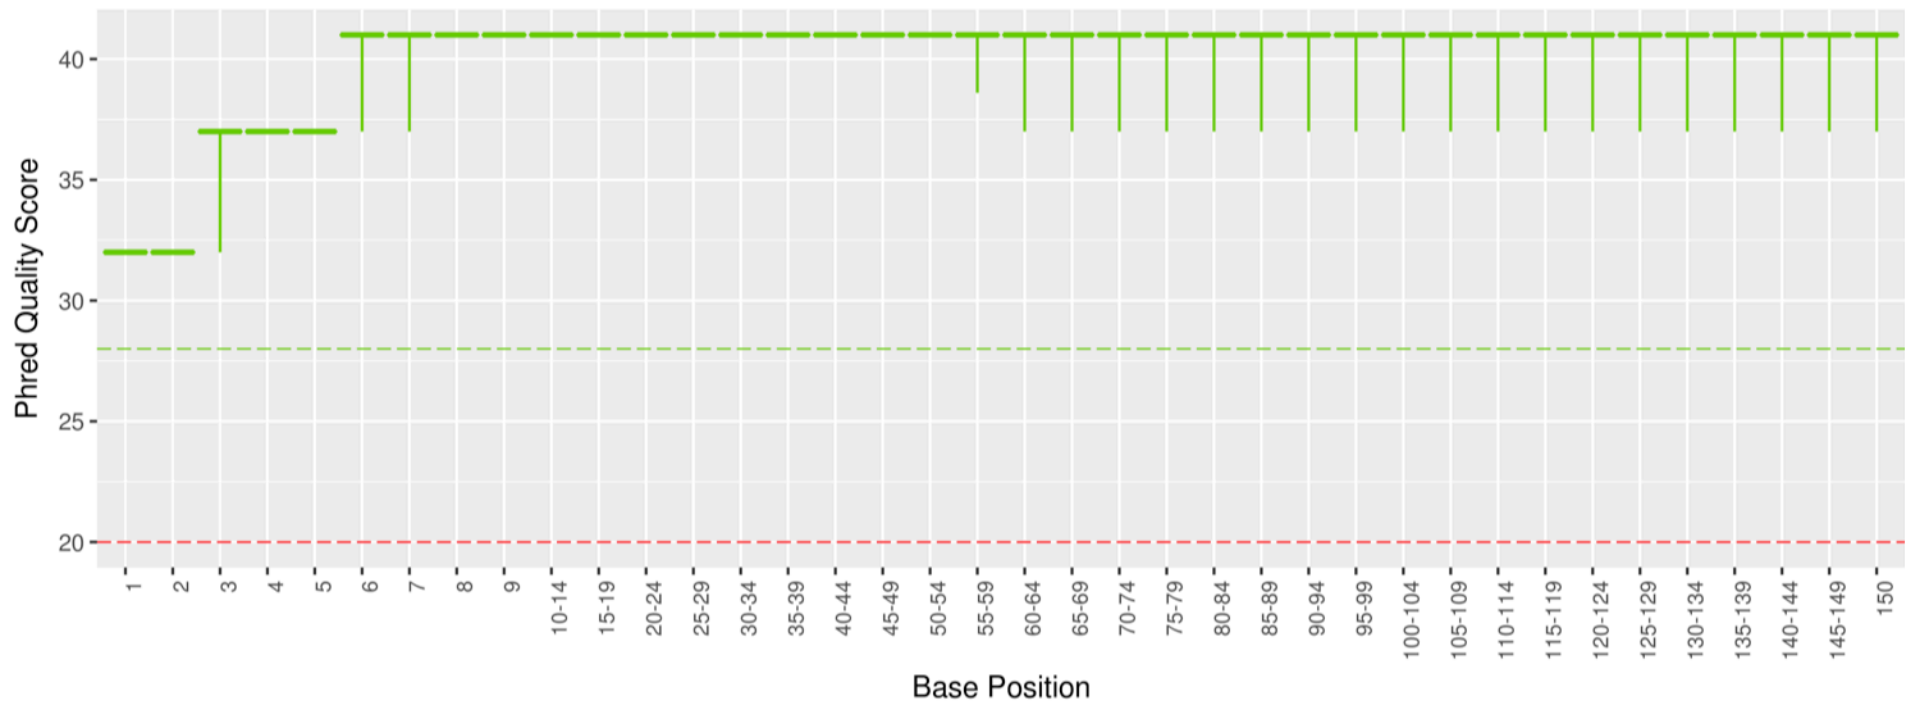

Female replicate 2\_R2-paired: Base Quality Distribution

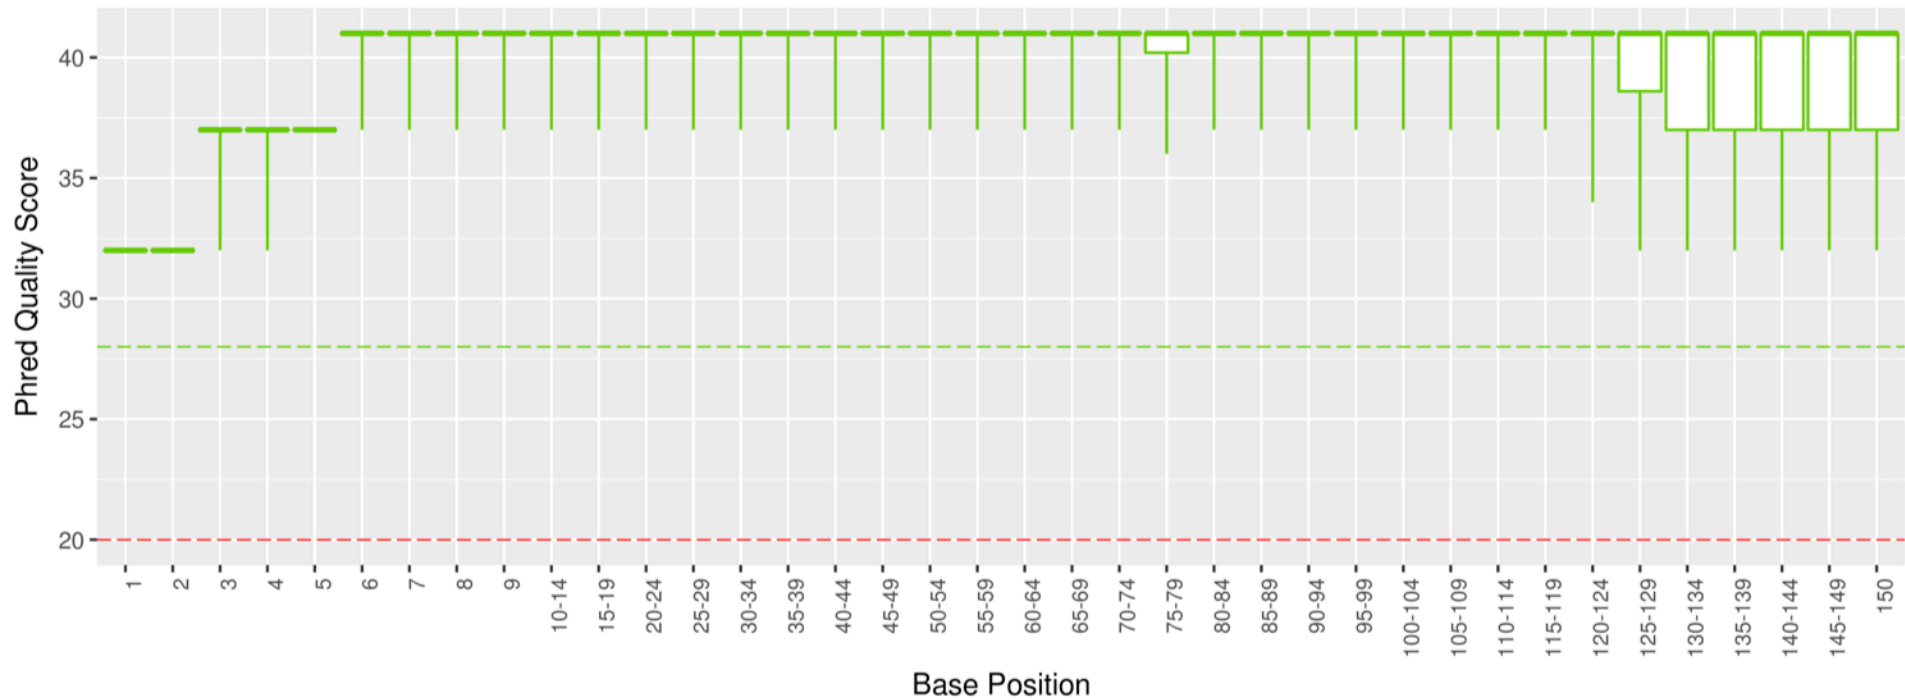



Female replicate 3\_R1-paired: Base Quality Distribution

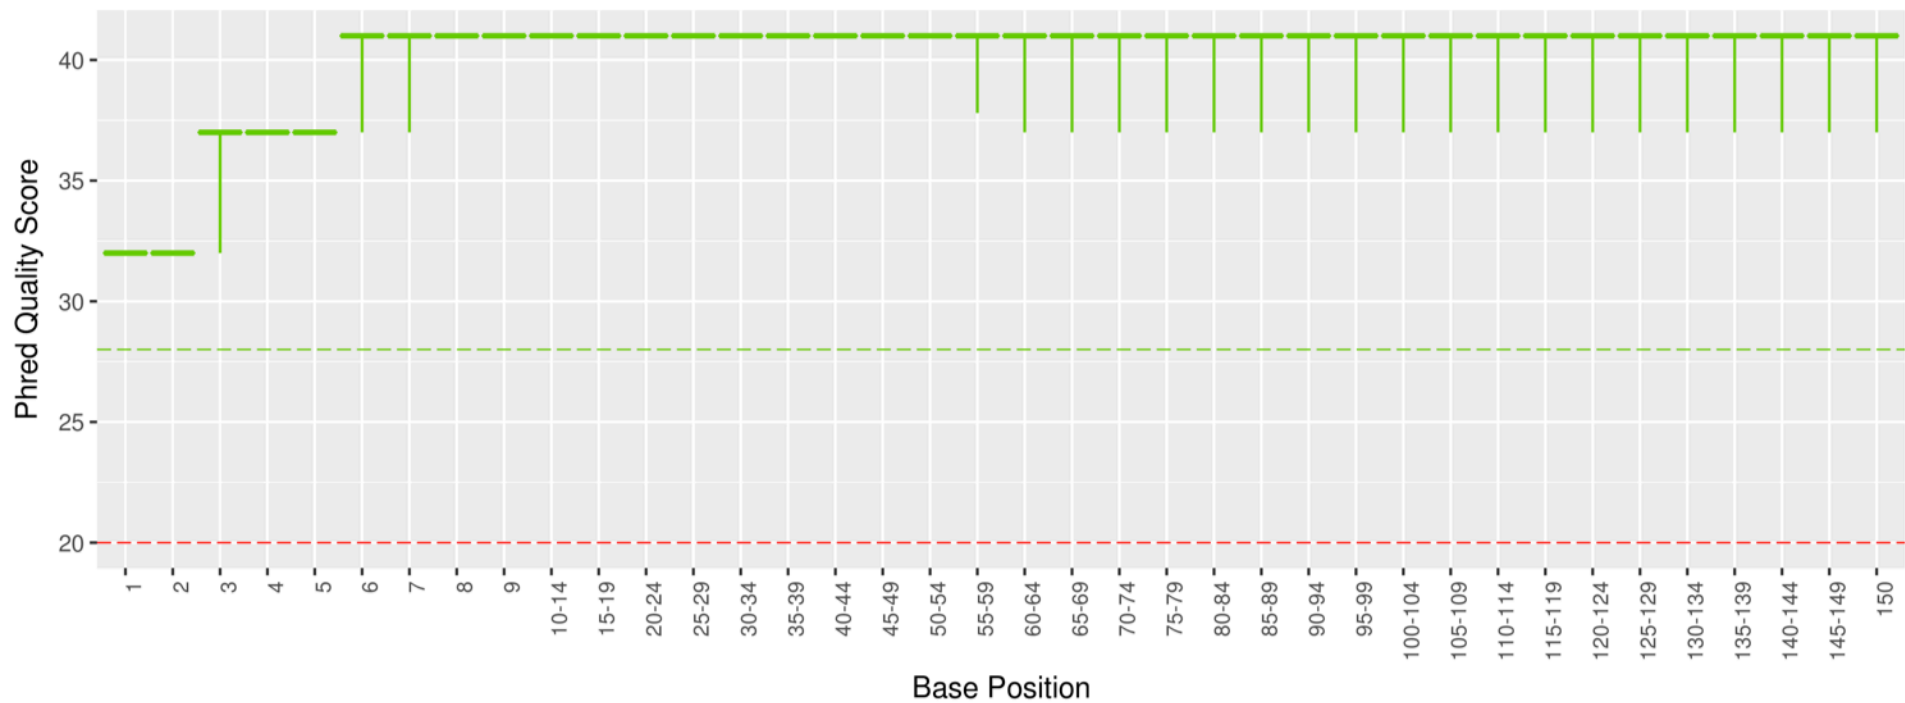

Female replicate 3\_R2-paired: Base Quality Distribution

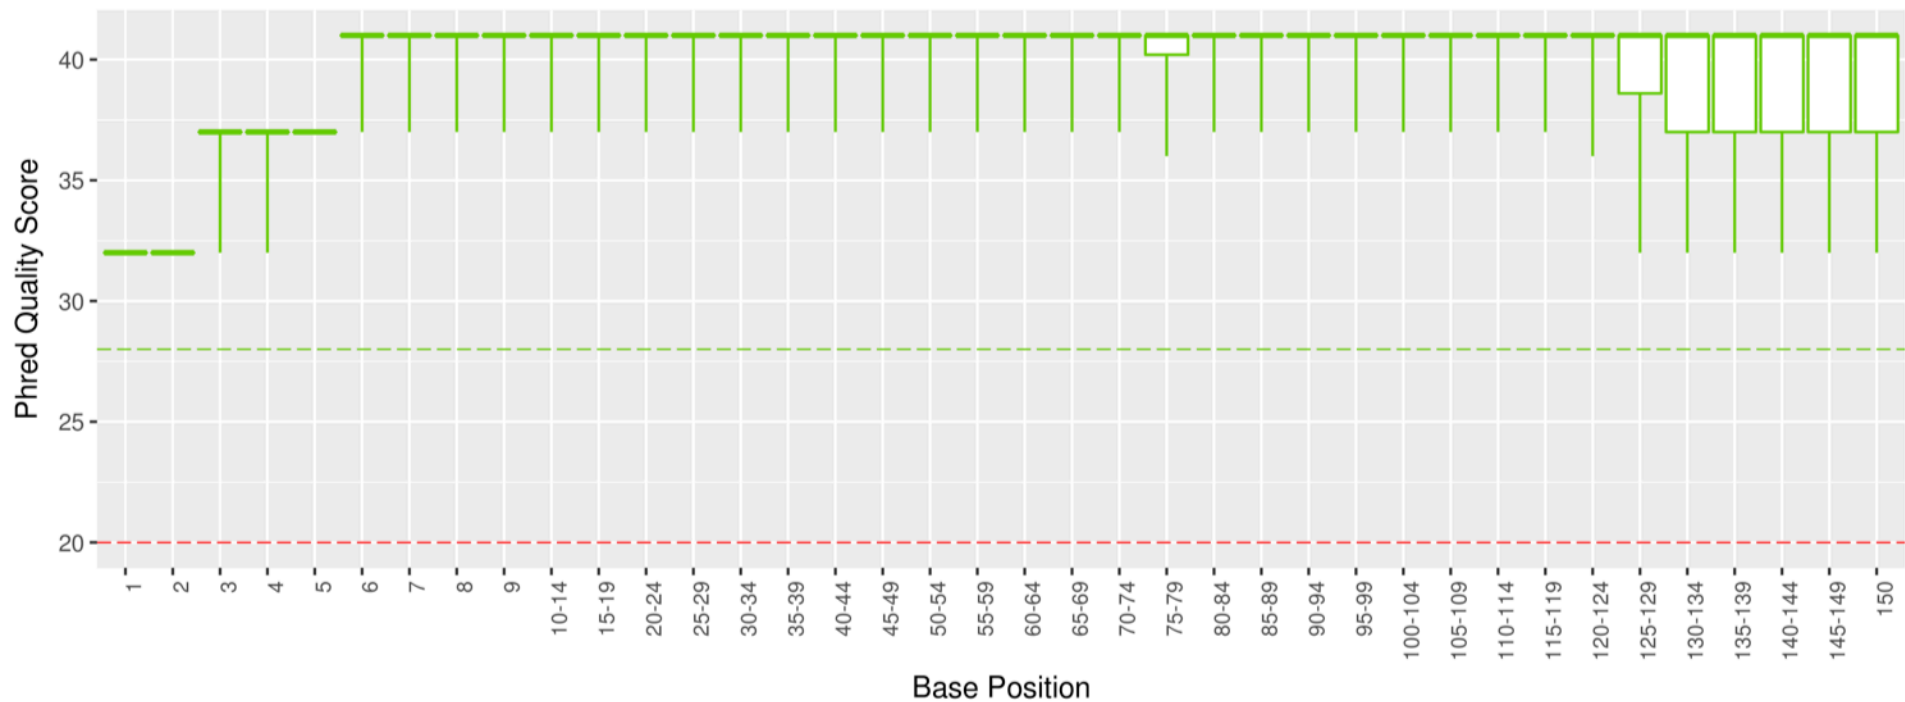

Supplement: 13071_2018_3086_MOESM1_ESM.pdf [file 13071_2018_3086_MOESM1_ESM.pdf]
