# Supplementary material for: Transcriptomic analysis of male and female Schistosoma mekongi adult worms
Source: PubMed Central journal article supplement (PMC6131826; doi:10.1186/s13071-018-3086-z), 2018-09-10

## **Additional file 8: Figure S3**

### **Gene Ontology Analysis**

Bar graph for GO term analysis in female up-regulated transcripts

# Biological Process

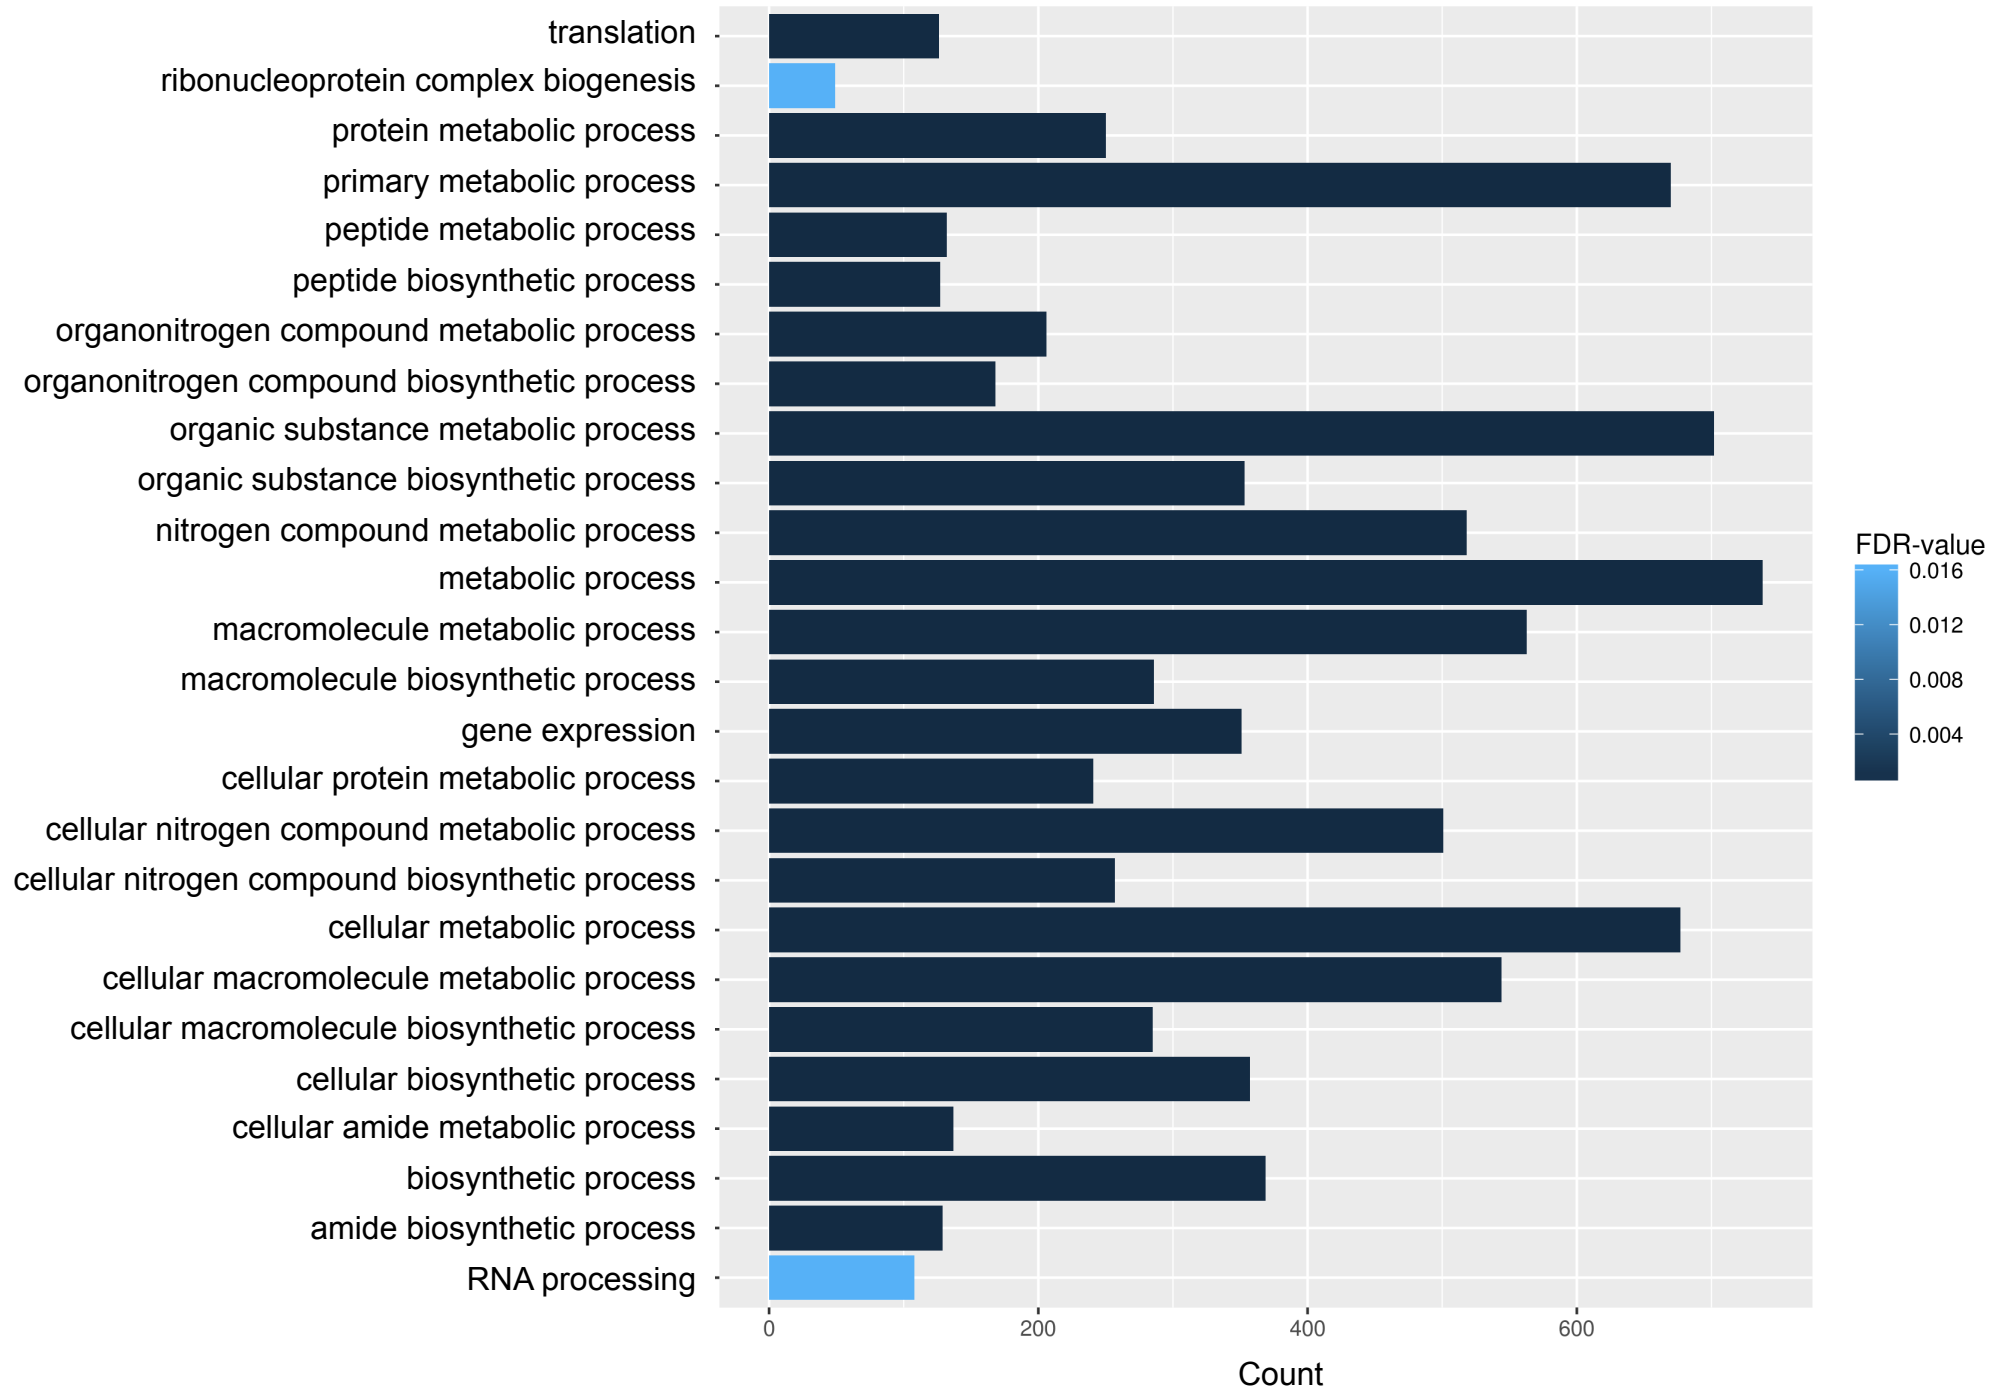

# Cellular Component

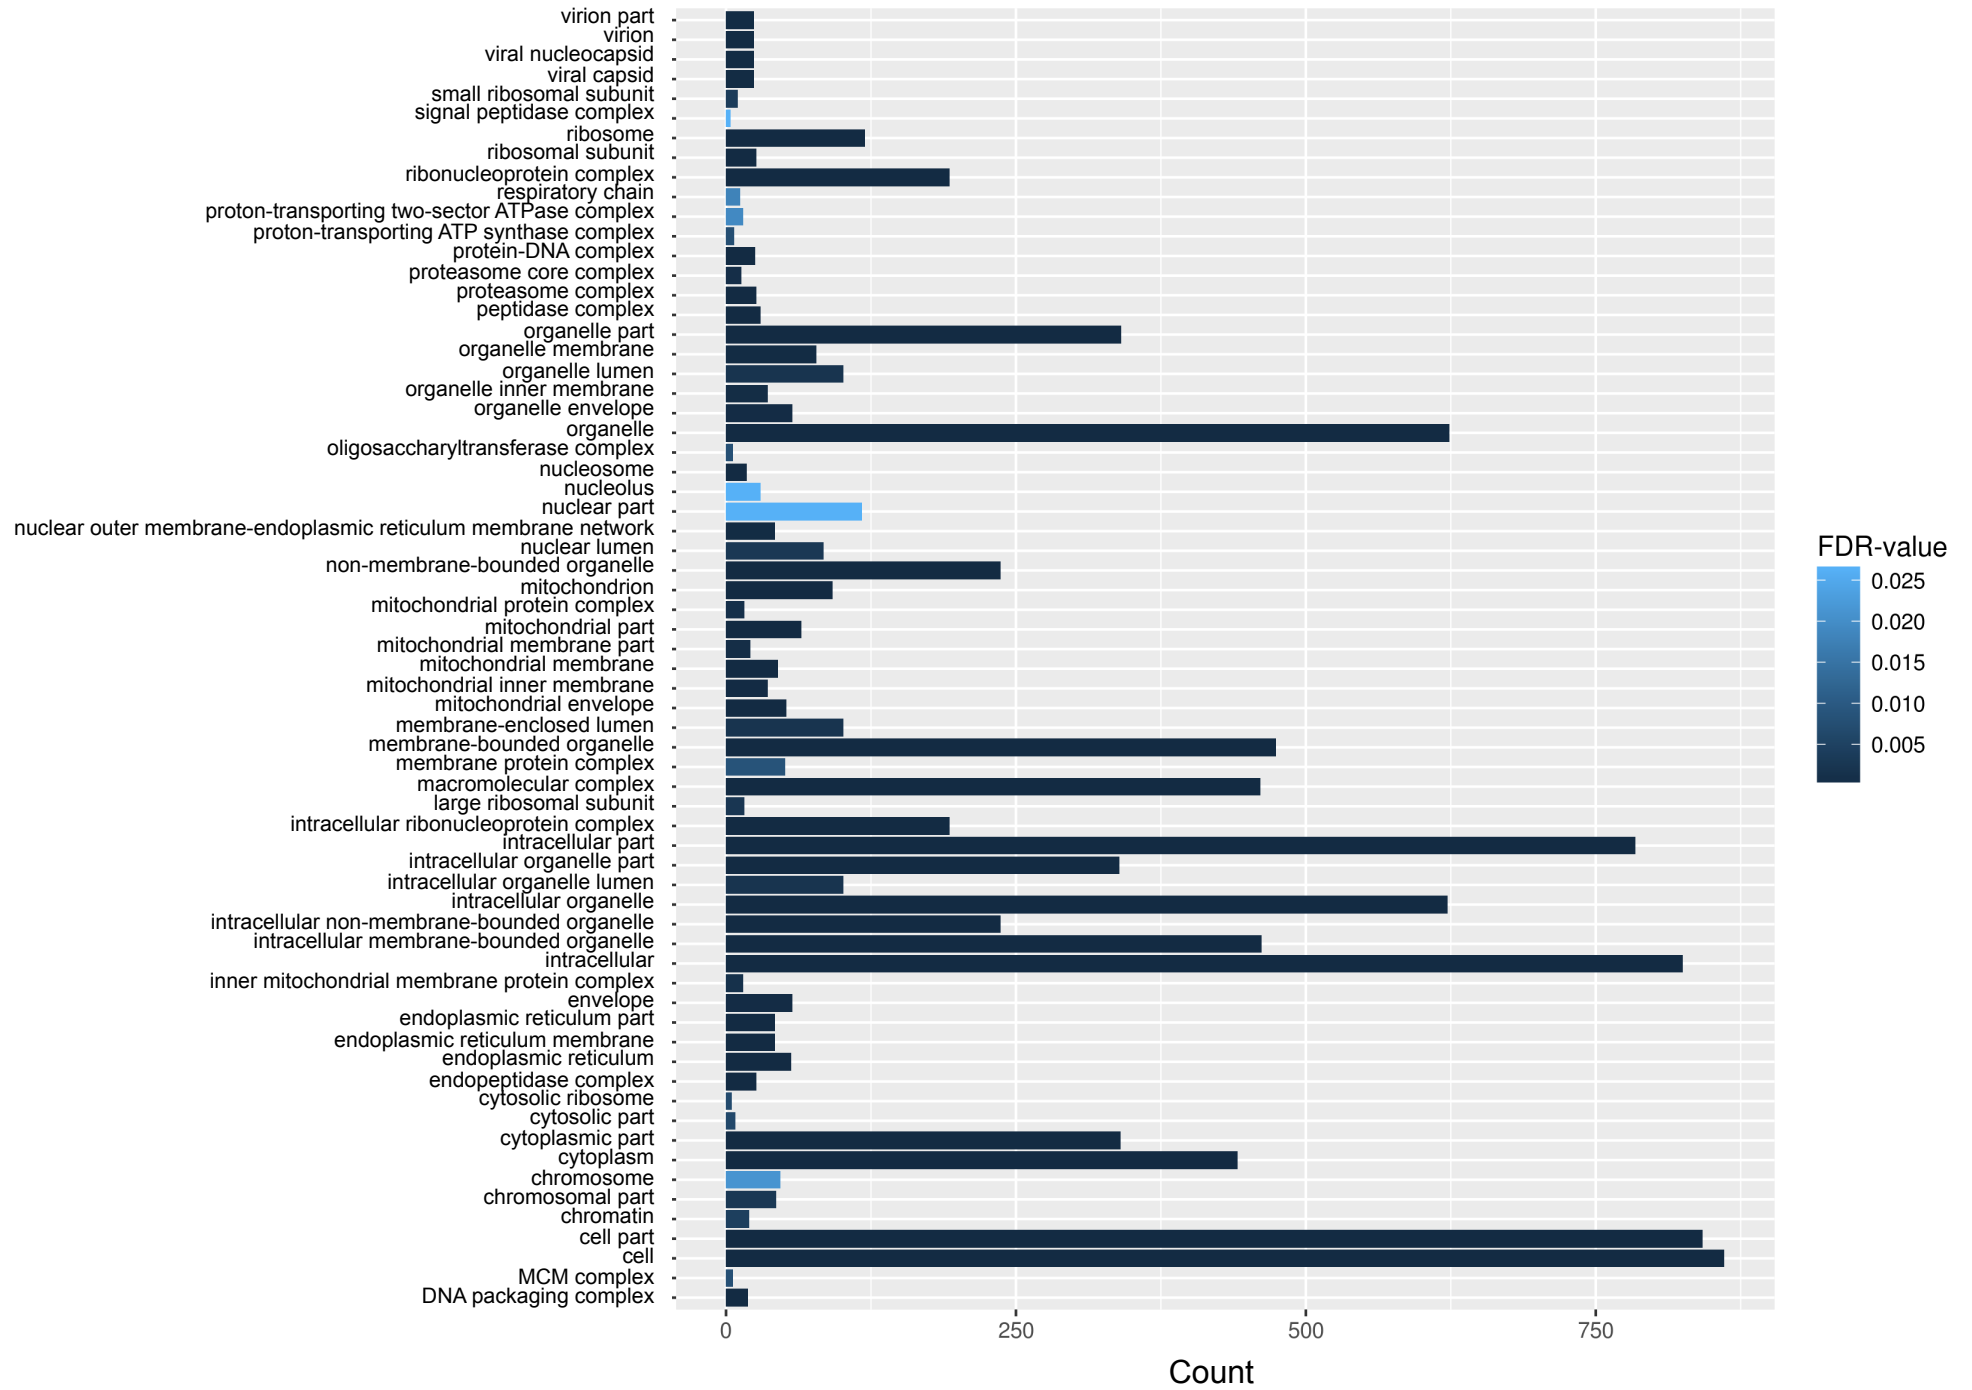

# Molecular Function

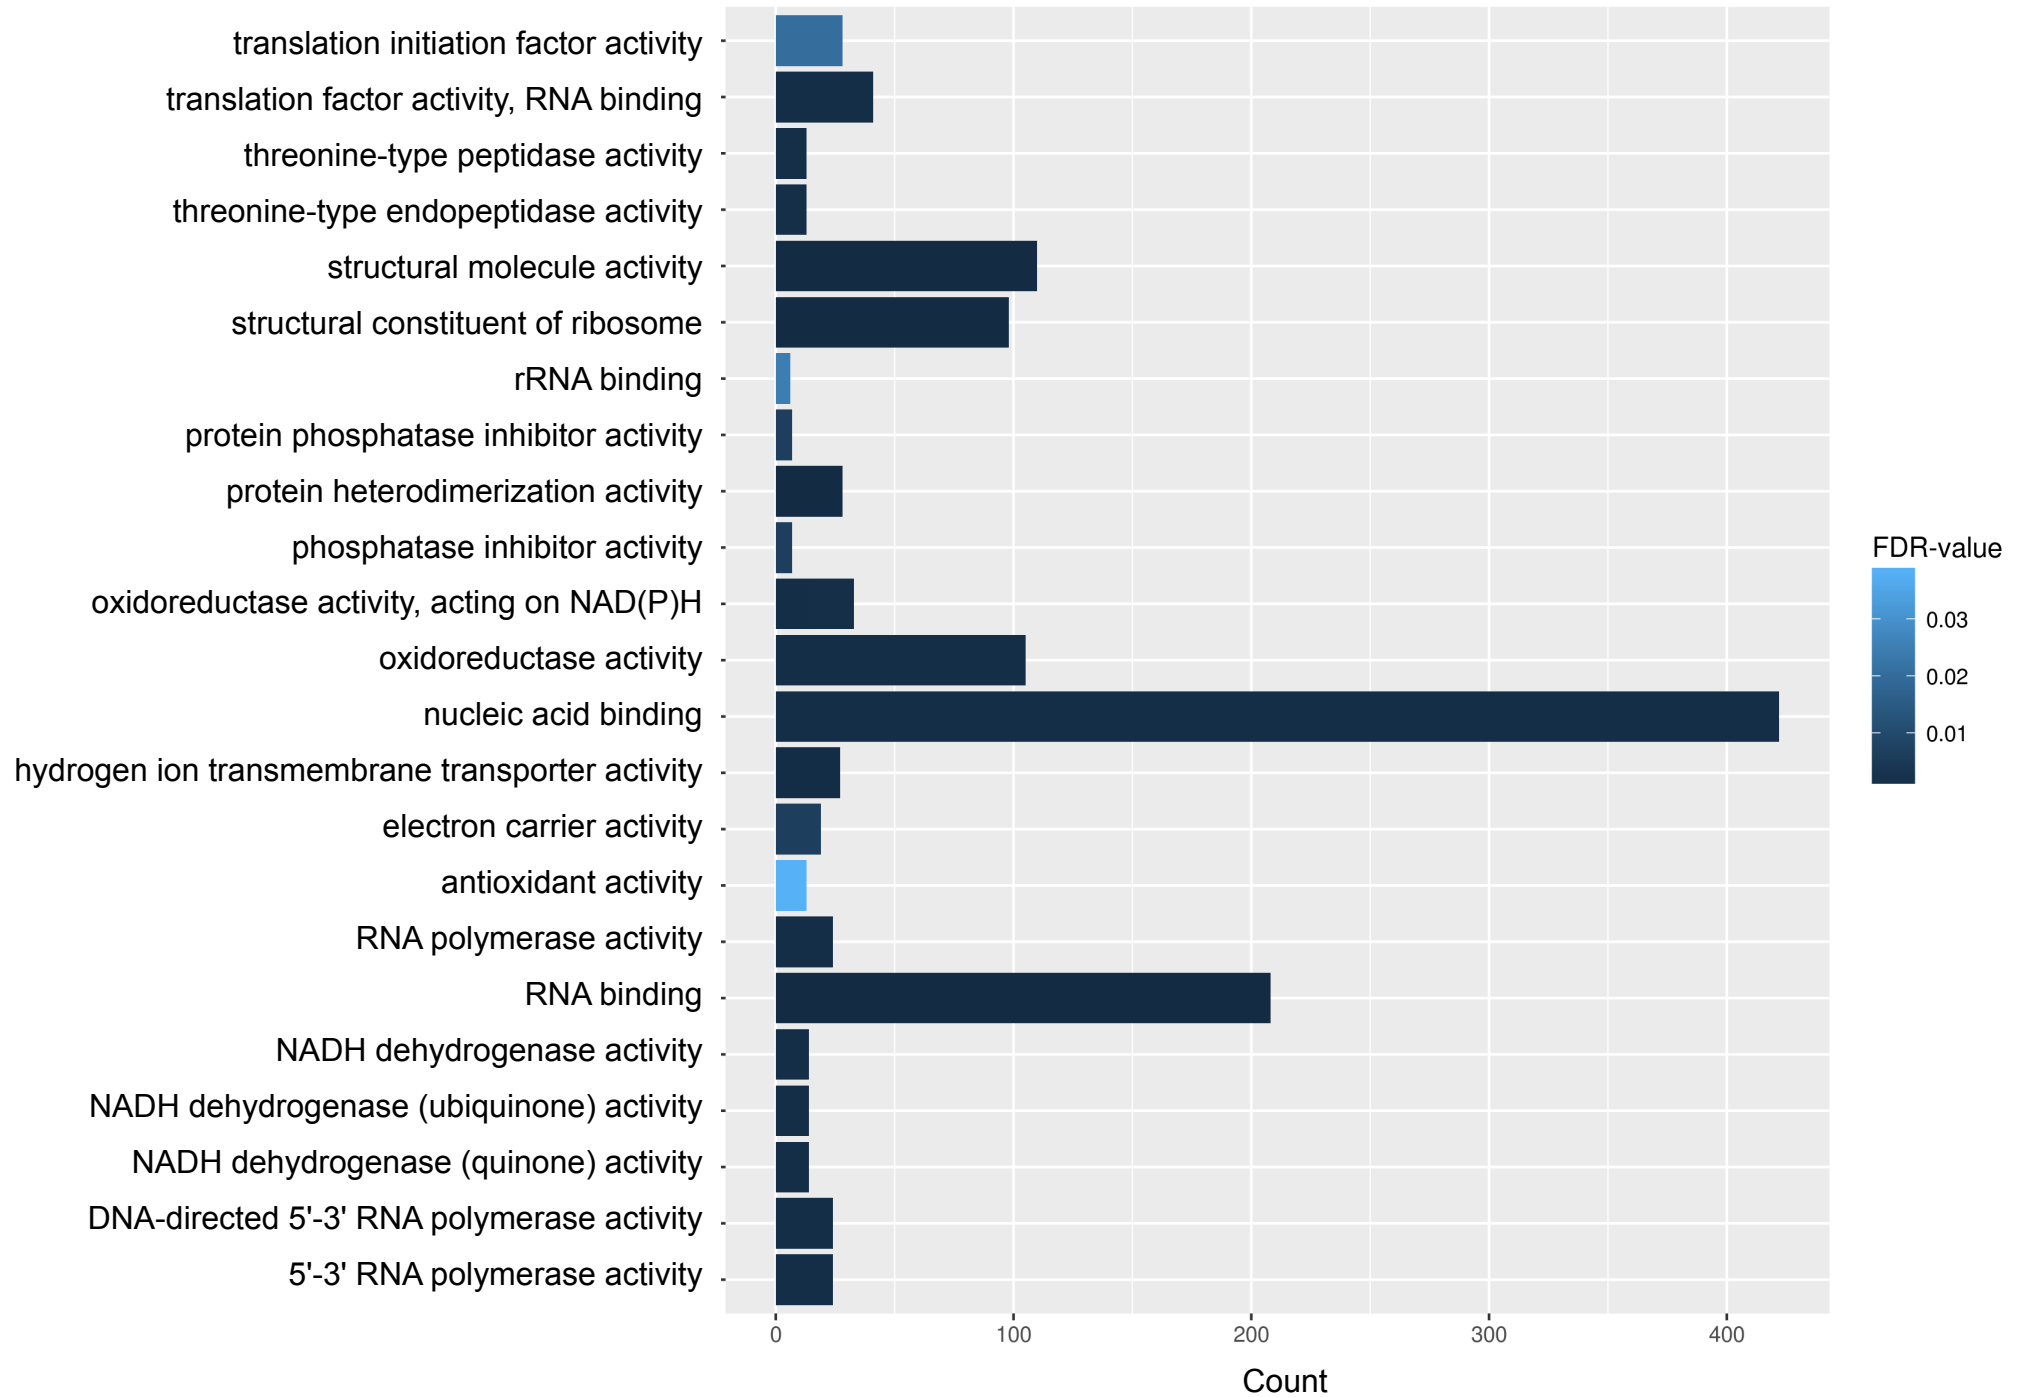

Supplement: 13071_2018_3086_MOESM8_ESM.pdf [file 13071_2018_3086_MOESM8_ESM.pdf]
