# Supplementary material for: Transcriptomic analysis of male and female Schistosoma mekongi adult worms
Source: PubMed Central journal article supplement (PMC6131826; doi:10.1186/s13071-018-3086-z), 2018-09-10

# **Additional file 12: Figure S4**

Correlation between RNA-Seq and RT-qPCR results

# Correlation between RNA-Seq and RT-qPCR results for 10 male-associated DE transcripts using Spearman's rho

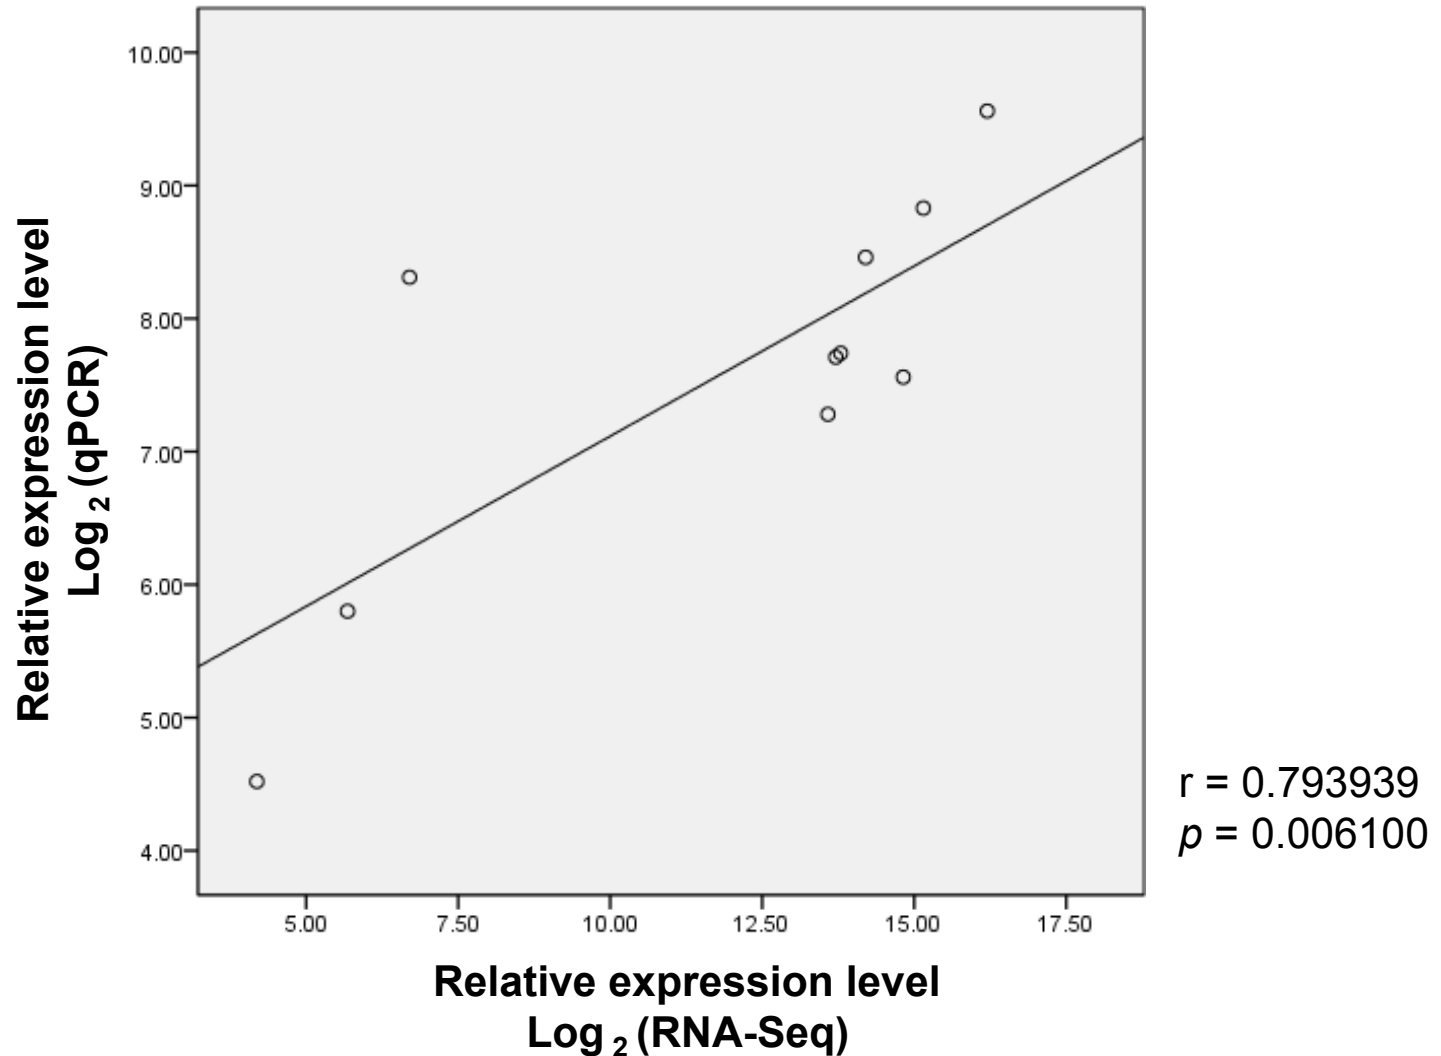

# Correlation between RNA-Seq and RT-qPCR results for 10 female-associated DE transcripts using Spearman's rho

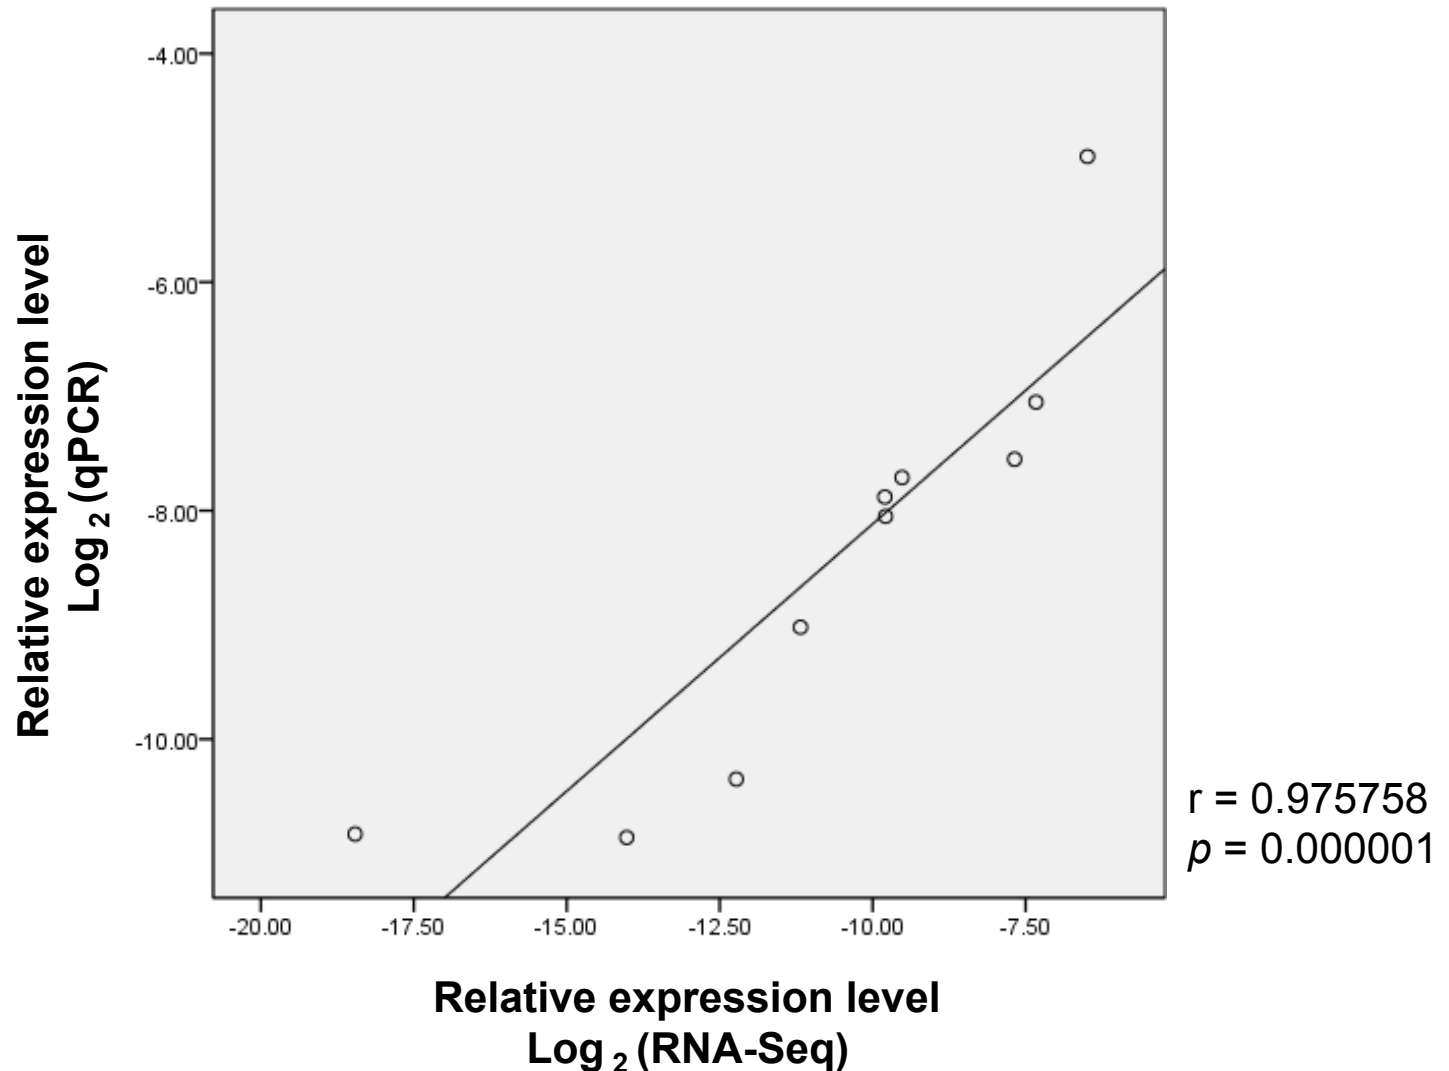

# Correlation between RNA-Seq and RT-qPCR results for 10 non-DE transcripts using Spearman's rho

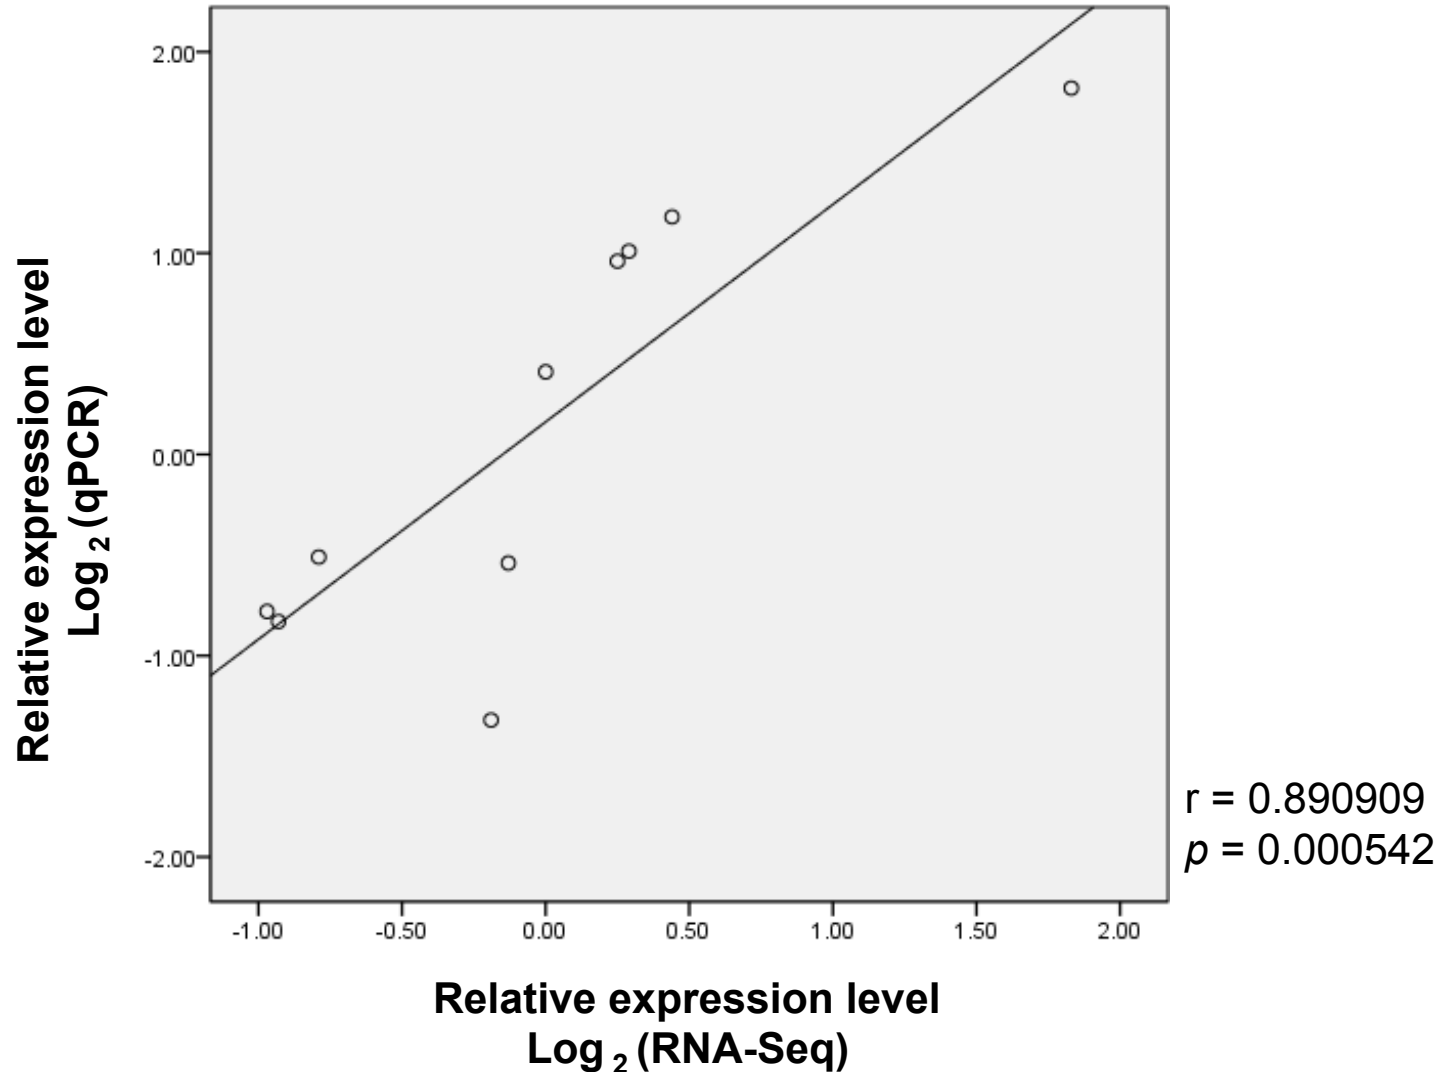

Supplement: 13071_2018_3086_MOESM12_ESM.pdf [file 13071_2018_3086_MOESM12_ESM.pdf]
