# Supplementary material for: Transcriptomic analysis of male and female Schistosoma mekongi adult worms
Source: PubMed Central journal article supplement (PMC6131826; doi:10.1186/s13071-018-3086-z), 2018-09-10
Supplement: 13071_2018_3086_MOESM14_ESM.pdf [file 13071_2018_3086_MOESM14_ESM.pdf]

# **Additional file 14: Figure S6**

RNA integrity analysis

# Ladder

## Electropherogram Summary

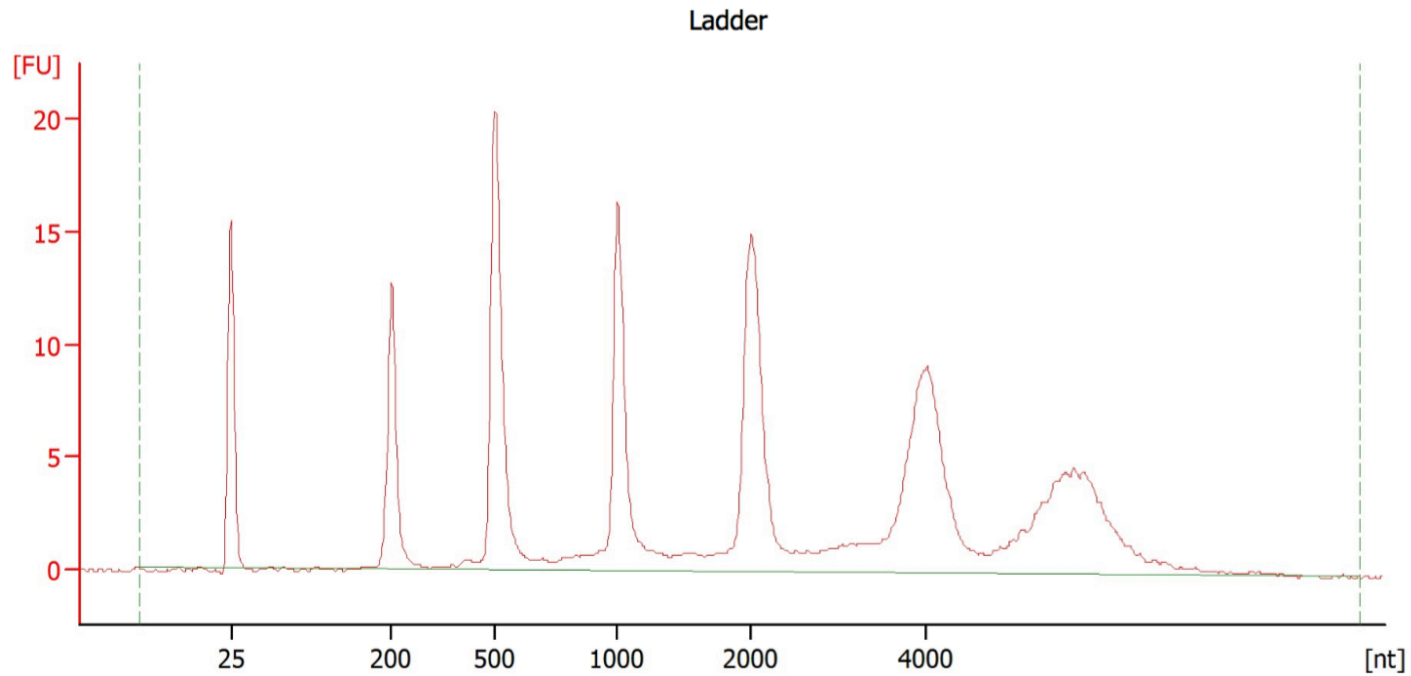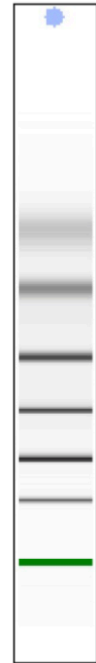

### Overall Results for Ladder

RNA Area: 189.0  
RNA Concentration: 150 ng/ $\mu$ l

Result Flagging Color:   
Result Flagging Label: All Other Samples

# Male Replicate 1

## Electropherogram Summary Continued ...

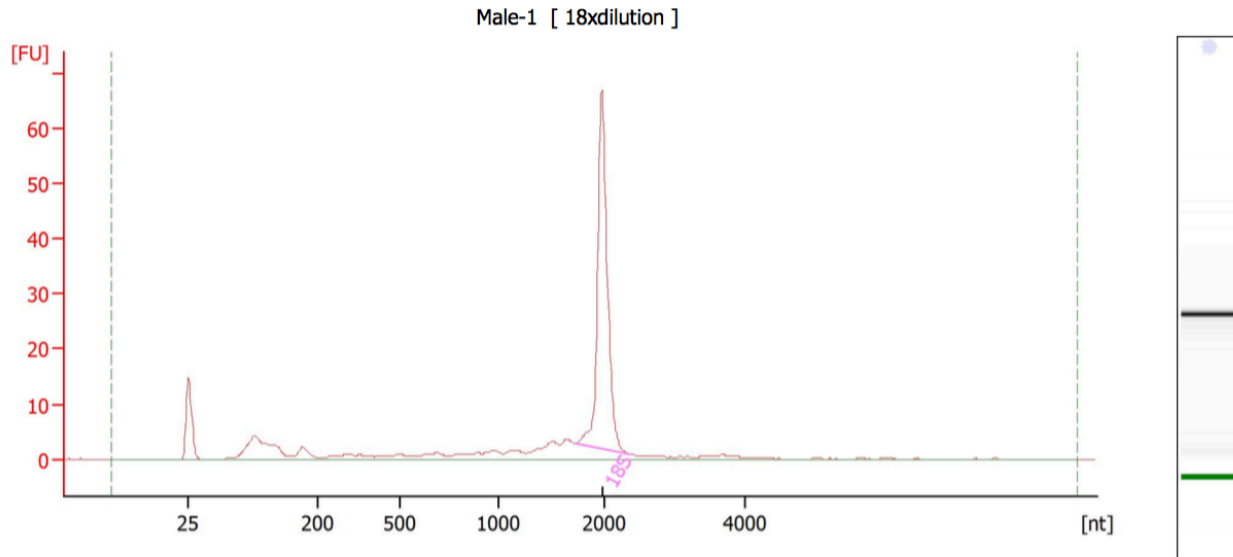

### Overall Results for sample 2 : Male-1

RNA Area: 179.1

RNA Concentration: 142 ng/ $\mu$ l

rRNA Ratio [28s / 18s]: 0.0

RNA Integrity Number (RIN):

8.1 (B.02.08,  
Anomaly Threshold(s)  
manually adapted)

Result Flagging Color:

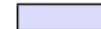

Result Flagging Label:

RIN: 8.10

### Fragment table for sample 2 : Male-1

| Name | Start Size [nt] | End Size [nt] | Area | % of total Area |
|------|-----------------|---------------|------|-----------------|
| 18S  | 1,729           | 2,352         | 86.1 | 48.1            |

# Male Replicate 2

## Electropherogram Summary Continued ...

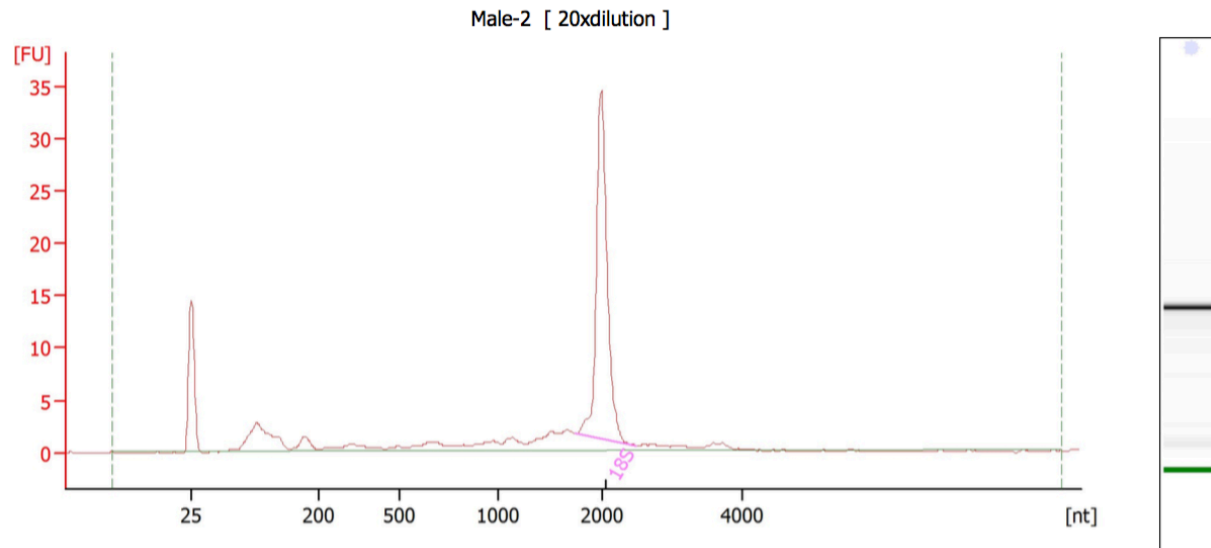

### Overall Results for sample 3 : Male-2

|                         |          |                             |                                                                                                                             |
|-------------------------|----------|-----------------------------|-----------------------------------------------------------------------------------------------------------------------------|
| RNA Area:               | 105.1    | RNA Integrity Number (RIN): | 7.7 (B.02.08,<br>Anomaly Threshold(s)<br>manually adapted)                                                                  |
| RNA Concentration:      | 83 ng/μl | Result Flagging Color:      | <span style="background-color: #ccccff; border: 1px solid black; display: inline-block; width: 20px; height: 10px;"></span> |
| rRNA Ratio [28s / 18s]: | 0.0      | Result Flagging Label:      | RIN: 7.70                                                                                                                   |

### Fragment table for sample 3 : Male-2

| Name | Start Size [nt] | End Size [nt] | Area | % of total Area |
|------|-----------------|---------------|------|-----------------|
| 18S  | 1,742           | 2,491         | 47.4 | 45.1            |

# Male Replicate 3

## Electropherogram Summary Continued ...

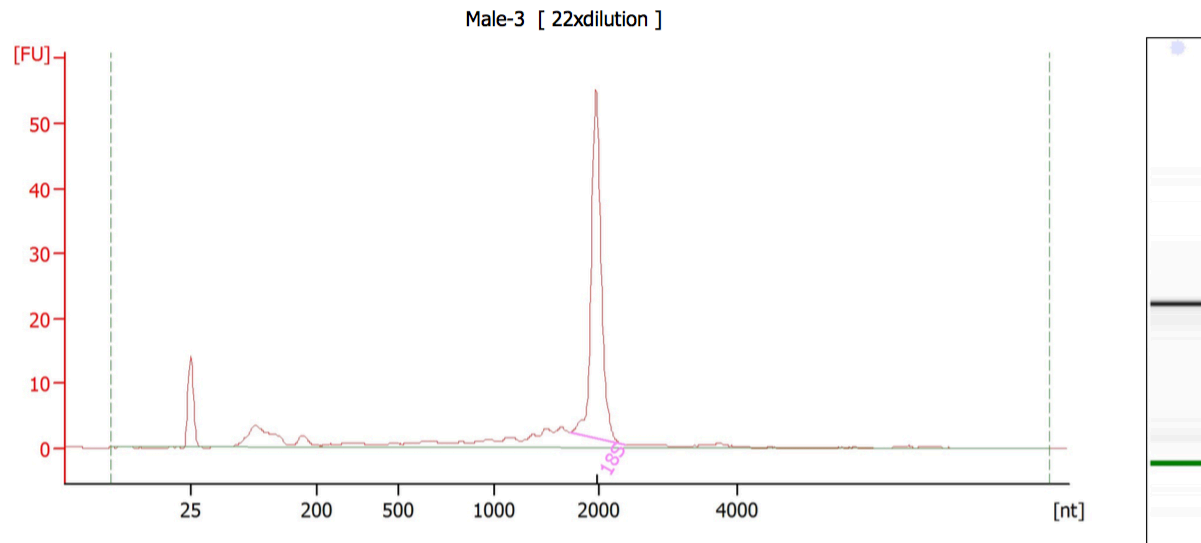

### Overall Results for sample 4 : Male-3

RNA Area: 150.2  
RNA Concentration: 119 ng/ $\mu$ l  
rRNA Ratio [28s / 18s]: 0.0

RNA Integrity Number (RIN):

7.9 (B.02.08,  
Anomaly Threshold(s)  
manually adapted)

Result Flagging Color:

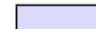

Result Flagging Label:

RIN: 7.90

### Fragment table for sample 4 : Male-3

| Name | Start Size [nt] | End Size [nt] | Area | % of total Area |
|------|-----------------|---------------|------|-----------------|
| 18S  | 1,718           | 2,382         | 71.3 | 47.4            |

# Female Replicate 1

## Electropherogram Summary Continued ...

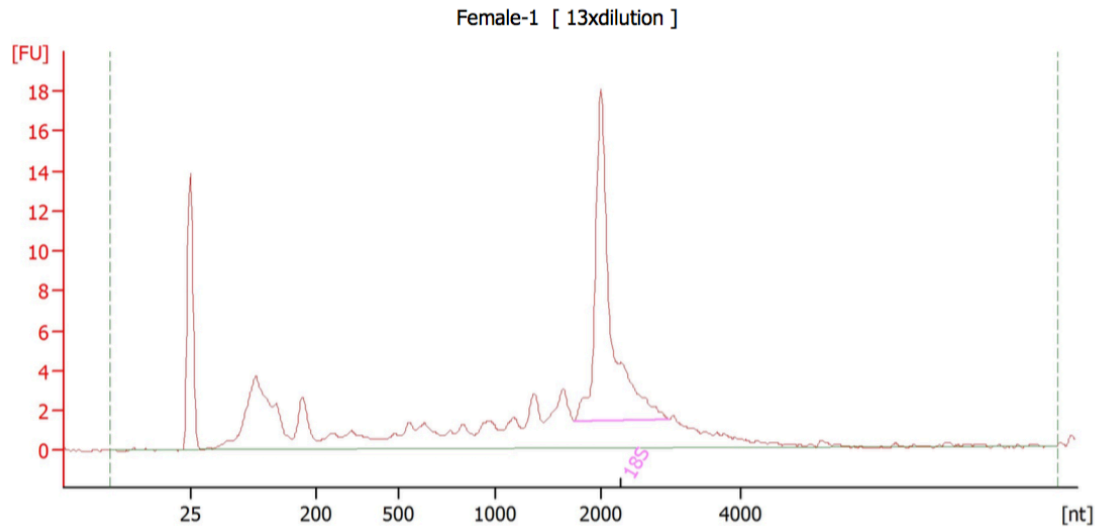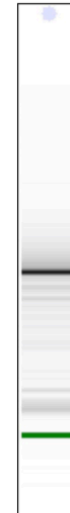

### Overall Results for sample 5 : Female-1

|                         |                |                             |                                                                                                                             |
|-------------------------|----------------|-----------------------------|-----------------------------------------------------------------------------------------------------------------------------|
| RNA Area:               | 122.3          | RNA Integrity Number (RIN): | 7.2 (B.02.08,<br>Anomaly Threshold(s)<br>manually adapted)                                                                  |
| RNA Concentration:      | 97 ng/ $\mu$ l | Result Flagging Color:      | <span style="background-color: #ccccff; border: 1px solid black; display: inline-block; width: 20px; height: 10px;"></span> |
| rRNA Ratio [28s / 18s]: | 0.0            | Result Flagging Label:      | RIN: 7.20                                                                                                                   |

### Fragment table for sample 5 : Female-1

| Name | Start Size [nt] | End Size [nt] | Area | % of total Area |
|------|-----------------|---------------|------|-----------------|
| 18S  | 1,734           | 2,971         | 33.8 | 27.6            |

# Female Replicate 2

## Electropherogram Summary Continued ...

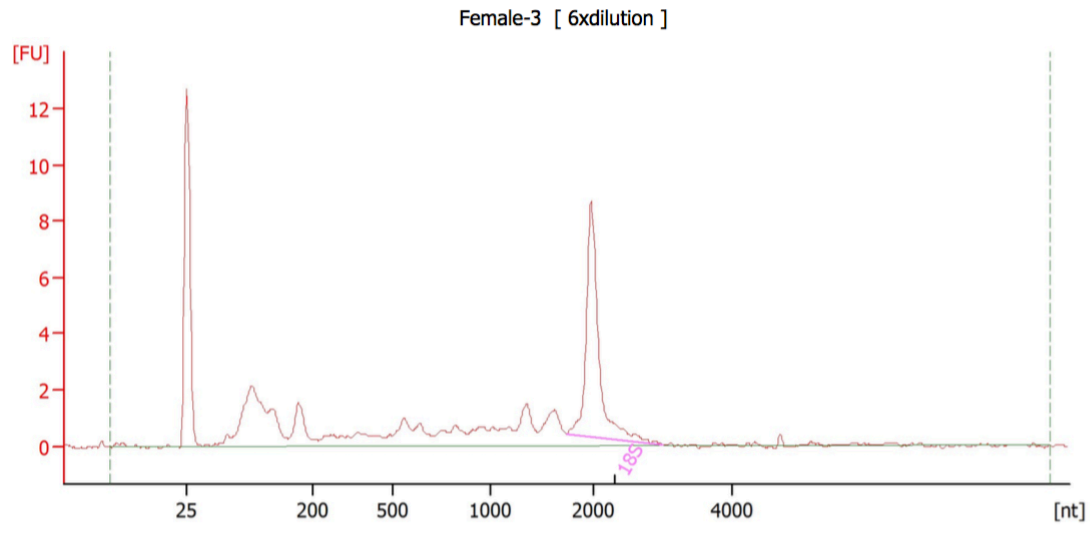

### Overall Results for sample 7 : Female-3

|                         |                |                             |                                                                                                                             |
|-------------------------|----------------|-----------------------------|-----------------------------------------------------------------------------------------------------------------------------|
| RNA Area:               | 55.5           | RNA Integrity Number (RIN): | 7.2 (B.02.08,<br>Anomaly Threshold(s)<br>manually adapted)                                                                  |
| RNA Concentration:      | 44 ng/ $\mu$ l | Result Flagging Color:      | <span style="background-color: #ccccff; border: 1px solid black; display: inline-block; width: 20px; height: 10px;"></span> |
| rRNA Ratio [28s / 18s]: | 0.0            | Result Flagging Label:      | RIN: 7.20                                                                                                                   |

### Fragment table for sample 7 : Female-3

| Name | Start Size [nt] | End Size [nt] | Area | % of total Area |
|------|-----------------|---------------|------|-----------------|
| 18S  | 1,732           | 3,014         | 14.0 | 25.3            |

# Female Replicate 3

## Electropherogram Summary Continued ...

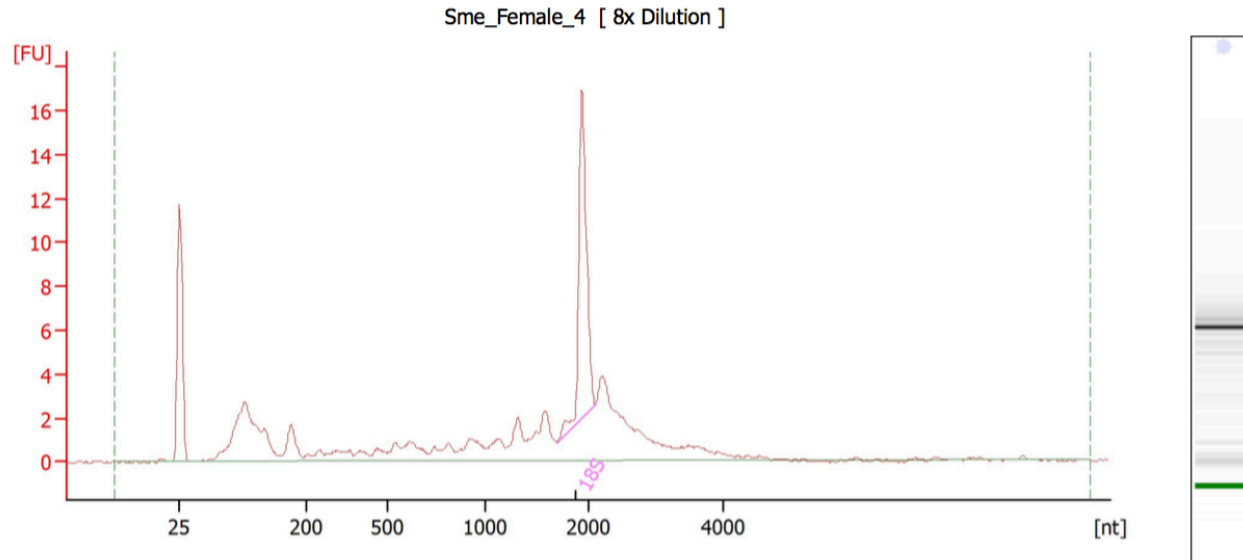

### Overall Results for sample 12 : Sme\_Female\_4

|                         |                 |                             |                                                                                                                             |
|-------------------------|-----------------|-----------------------------|-----------------------------------------------------------------------------------------------------------------------------|
| RNA Area:               | 85.2            | RNA Integrity Number (RIN): | 6.6 (B.02.08)                                                                                                               |
| RNA Concentration:      | 131 ng/ $\mu$ l | Result Flagging Color:      | <span style="background-color: #ccccff; border: 1px solid black; display: inline-block; width: 20px; height: 10px;"></span> |
| rRNA Ratio [28s / 18s]: | 0.0             | Result Flagging Label:      | RIN: 6.60                                                                                                                   |

### Fragment table for sample 12 : Sme\_Female\_4

| Name | Start Size [nt] | End Size [nt] | Area | % of total Area |
|------|-----------------|---------------|------|-----------------|
| 18S  | 1,692           | 2,097         | 15.7 | 18.5            |
