# Supplementary material for: Transcriptomic analysis of male and female Schistosoma mekongi adult worms
Source: PubMed Central journal article supplement (PMC6131826; doi:10.1186/s13071-018-3086-z), 2018-09-10
Supplement: 13071_2018_3086_MOESM15_ESM.pdf [file 13071_2018_3086_MOESM15_ESM.pdf]

**Additional file 15: Table S9.** Oligonucleotide primer sets used for RT-qPCR validation.

| No. | Transcript ID | Seq 5' - 3'                                            | Nt       | Product size (bp) |
|-----|---------------|--------------------------------------------------------|----------|-------------------|
| 1   | comp65_seq18  | Fw: ATACTATCCAGCCGTTGTCCAC<br>Rw: TTGCCACTCCGTTTGTTC   | 22<br>20 | 119               |
| 2   | comp1481_seq2 | Fw: TGAGCTCGGATTTGCAGAAC<br>Rw: ACGGGCAAATTCAACCAAGG   | 20<br>20 | 112               |
| 3   | comp2831_seq1 | Fw: TGGTGAGACCAGAATGTTCTCC<br>Rw: ATCGTGATGCTGTTGCTGTG | 22<br>20 | 97                |
| 4   | comp926_seq0  | Fw: TCGCATCTTGTTTGCACACC<br>Rw: AGGTACAAAATGCGGGCATG   | 20<br>20 | 137               |
| 5   | comp1045_seq0 | Fw: AACCAAGTACGTGGTGGTTGG<br>Rw: ACGCCATACATTTCCAAGGC  | 20<br>20 | 86                |
| 6   | comp3726_seq0 | Fw: ACGCCGTGGAAAATTTGGTG<br>Rw: ATTTGCACGACTTGGTACCG   | 20<br>20 | 121               |
| 7   | comp4508_seq0 | Fw: AAGCCACCAATATGTGCTGAG<br>Rw: ACAGTGTTTCGTGCCATAAC  | 21<br>20 | 103               |
| 8   | comp1311_seq0 | Fw: AACACAACCACAAGGCAGTC<br>Rw: TAGCCTGTGGTGCAAATTGC   | 20<br>20 | 107               |

|    |                |                                                        |          |     |
|----|----------------|--------------------------------------------------------|----------|-----|
| 9  | comp2062_seq0  | Fw: TGCGAAAACCAGTGAAGGTG<br>Rw: AGTGCACGCTTTTTGCCTTG   | 20<br>20 | 99  |
| 10 | comp4395_seq2  | Fw: TCCATTTTGGCGCCATTACC<br>Rw: GCTGGTGCAGTAGGATAACAAC | 20<br>22 | 128 |
| 11 | comp2758_seq1  | Fw: GTGGTGGTGGTGTTAATCTTGC<br>Rw: AGAACTTGGCACATGCATGC | 22<br>20 | 74  |
| 12 | comp4912_seq0  | Fw: ATGGGTGTAGCTGATGAGGATG<br>Rw: GGCAAGAACGGCAACATTTG | 22<br>20 | 73  |
| 13 | comp2149_seq0  | Fw: AACGGAAGCGTTCAAAGTGG<br>Rw: TTGAACACAGACTCGGGTTG   | 20<br>20 | 122 |
| 14 | comp5896_seq0  | Fw: GCAAGTCTTCAAGGTGAGTTGG<br>Rw: GTGGGGAGGTGAGGAATTTG | 22<br>21 | 92  |
| 15 | comp837_seq1   | Fw: GGCTCAATCTACTGCAGCTTTG<br>Rw: TGTGCTTTGTGCCACACTTG | 22<br>20 | 82  |
| 16 | comp5430_seq10 | Fw: ACTTGCATCGGATATCCACTGG<br>Rw: TGCTCAACGCATGCTTGTTT | 22<br>20 | 73  |
| 17 | comp1134_seq0  | Fw: CGCGCACGTTAAACCTTCTAG<br>Rw: AAGTGCGCATACTTCACGTG  | 21<br>20 | 114 |

|    |               |                                                          |          |     |
|----|---------------|----------------------------------------------------------|----------|-----|
| 18 | comp5560_seq0 | Fw: TAATGCGTCGTGTAGTCAGGTC<br>Rw: ATTGAGCCAACCATCAGACG   | 22<br>20 | 81  |
| 19 | comp3298_seq0 | Fw: TCTCGCCTGCGGAAATATTG<br>Rw: AGGCACGAAGAACAATTGCG     | 20<br>20 | 129 |
| 20 | comp1148_seq0 | Fw: ATTCCCGACGCAATGTGTTC<br>Rw: TCGCCAACCTGCATTACAAG     | 20<br>20 | 91  |
| 21 | comp9311_seq2 | Fw: GCGGTGGACTTTATACTCTTGG<br>Rw: TTCTCCTCCAATCGCTCCAAC  | 22<br>21 | 92  |
| 22 | comp6513_seq0 | Fw: TGCCTGGGAACGTGTATTTG<br>Rw: TGACAAAGCAGCAACAGCAG     | 20<br>20 | 103 |
| 23 | comp7481_seq0 | Fw: AAGATCCAAGGAACCGACTGTC<br>Rw: GTGCTGAAGAAGGGCTTTATGG | 22<br>22 | 107 |
| 24 | comp5964_seq1 | Fw: AAAAGTGGCGCCATGAATCC<br>Rw: TCACCTCATGACTGCCCTAATG   | 20<br>22 | 137 |
| 25 | comp2803_seq0 | Fw: AAGCAGTCAAAGCTGGCAAC<br>Rw: AAGCCGGCGTAACTTTGTTC     | 20<br>20 | 85  |
| 26 | comp7056_seq1 | Fw: TCATCGTGA ACTCTGCAAGC<br>Rw: TCCAGGGCAGTCAACAAGTG    | 20<br>20 | 89  |

|    |                                         |                                                           |          |     |
|----|-----------------------------------------|-----------------------------------------------------------|----------|-----|
| 27 | comp4888_seq3                           | Fw: AACCCAGCAAAGGATAACGC<br>Rw: ACTTTGGAAGTGCACGTTGG      | 20<br>20 | 100 |
| 28 | comp2642_seq0                           | Fw: ACAGCACCACTACAGAGACATG<br>Rw: AATATTGCAGCCCGGACTTC    | 22<br>20 | 127 |
| 29 | comp5540_seq1                           | Fw: TTGCATGACGTGAACAAGCC<br>Rw: ATGTGGCCTGTGCACAAAAC      | 20<br>20 | 89  |
| 30 | comp1556_seq4                           | Fw: TCTGGCCTCGATGTGATATTCG<br>Rw: AAAACGTTGCGGTGAACCAC    | 22<br>20 | 93  |
| 31 | 18S ribosomal RNA<br>(Internal control) | Fw: TGTGCAACCTTTCAGCCGTGTC<br>Rw: AAGGCATCCGAAAGCATGCCAAC | 22<br>23 | 102 |
| 32 | comp5733_seq0<br>(Elastase 2b)          | Fw: GGATTGCATTTCTCGCACTC<br>Rw: CCACCGAATGATTGTGTGAC      | 20<br>20 | 139 |
