# Supplementary material for: Transcriptomic analysis of male and female Schistosoma mekongi adult worms
Source: Parasit Vectors. 2018 Sep 10;11:504. doi: 10.1186/s13071-018-3086-z (PMC6131826; doi:10.1186/s13071-018-3086-z)
Supplement: Supplementary file 7 — Table S5. Detailed information on GO term analysis in female upregulated transcripts. (XLSX 94 kb) [file 13071_2018_3086_MOESM7_ESM.xlsx]

## Sheet: Biological Process
Additional file 7: Table S5. Detailed information on GO term analysis in female up-regulated transcripts.
GO.ID	Term	Annotated	Significant	Expected	p-value	FDR-value	Enrichment	Transcripts
GO:0043603	cellular amide metabolic process	306	137	69.49	7.4e-19	1.92474e-15	1.97151	comp101_seq0,comp104_seq0,comp105_seq0,comp107_seq0,comp108102_seq0,comp108_seq0,comp109_seq0,comp111_seq0,comp1142_seq1,comp1158_seq0,comp116_seq1,comp1195_seq0,comp11_seq0,comp1201_seq2,comp1201_seq5,comp120_seq0,comp1239_seq2,comp1256_seq0,comp1272_seq1,comp127_seq2,comp129_seq0,comp131_seq0,comp134_seq0,comp140_seq0,comp147_seq0,comp14_seq0,comp14_seq1,comp150_seq0,comp153_seq2,comp154_seq0,c…
GO:0006518	peptide metabolic process	295	132	66.99	3.7e-18	2.92613e-15	1.97044	comp101_seq0,comp104_seq0,comp105_seq0,comp107_seq0,comp108102_seq0,comp108_seq0,comp109_seq0,comp111_seq0,comp1142_seq1,comp1158_seq0,comp116_seq1,comp1195_seq0,comp11_seq0,comp1201_seq2,comp1201_seq5,comp120_seq0,comp1239_seq2,comp1256_seq0,comp1272_seq1,comp127_seq2,comp129_seq0,comp131_seq0,comp134_seq0,comp140_seq0,comp147_seq0,comp14_seq0,comp14_seq1,comp150_seq0,comp153_seq2,comp154_seq0,c…
GO:0043604	amide biosynthetic process	286	129	64.95	4.1e-18	2.92613e-15	1.98614	comp101_seq0,comp104_seq0,comp105_seq0,comp107_seq0,comp108102_seq0,comp108_seq0,comp109_seq0,comp111_seq0,comp1142_seq1,comp1158_seq0,comp116_seq1,comp1195_seq0,comp11_seq0,comp1201_seq2,comp1201_seq5,comp120_seq0,comp1239_seq2,comp1256_seq0,comp1272_seq1,comp127_seq2,comp129_seq0,comp131_seq0,comp134_seq0,comp140_seq0,comp147_seq0,comp14_seq0,comp14_seq1,comp150_seq0,comp153_seq2,comp154_seq0,c…
GO:0006412	translation	277	126	62.9	4.5e-18	2.92613e-15	2.00318	comp101_seq0,comp104_seq0,comp105_seq0,comp107_seq0,comp108102_seq0,comp108_seq0,comp109_seq0,comp111_seq0,comp1142_seq1,comp1158_seq0,comp116_seq1,comp1195_seq0,comp11_seq0,comp1201_seq2,comp1201_seq5,comp120_seq0,comp1239_seq2,comp1256_seq0,comp1272_seq1,comp127_seq2,comp129_seq0,comp131_seq0,comp134_seq0,comp140_seq0,comp147_seq0,comp14_seq0,comp14_seq1,comp150_seq0,comp153_seq2,comp154_seq0,c…
GO:0043043	peptide biosynthetic process	281	127	63.81	6.3e-18	3.27726e-15	1.99028	comp101_seq0,comp104_seq0,comp105_seq0,comp107_seq0,comp108102_seq0,comp108_seq0,comp109_seq0,comp111_seq0,comp1142_seq1,comp1158_seq0,comp116_seq1,comp1195_seq0,comp11_seq0,comp1201_seq2,comp1201_seq5,comp120_seq0,comp1239_seq2,comp1256_seq0,comp1272_seq1,comp127_seq2,comp129_seq0,comp131_seq0,comp134_seq0,comp140_seq0,comp147_seq0,comp14_seq0,comp14_seq1,comp150_seq0,comp153_seq2,comp154_seq0,c…
GO:1901566	organonitrogen compound biosynthetic pro...	421	168	95.6	7.4e-17	3.2079e-14	1.75732	comp101_seq0,comp104_seq0,comp1053_seq1,comp105_seq0,comp1062_seq0,comp107_seq0,comp108102_seq0,comp108_seq0,comp109_seq0,comp11085_seq1,comp111_seq0,comp1142_seq1,comp1158_seq0,comp116_seq1,comp1195_seq0,comp1199_seq1,comp11_seq0,comp1201_seq2,comp1201_seq5,comp1203_seq1,comp120_seq0,comp1219_seq0,comp1239_seq2,comp1239_seq3,comp1256_seq0,comp1272_seq1,comp127_seq2,comp128_seq0,comp129_seq0,comp…
GO:1901564	organonitrogen compound metabolic proces...	557	206	126.49	2.9e-16	1.07756e-13	1.62859	comp101_seq0,comp104_seq0,comp1053_seq1,comp105_seq0,comp1060_seq1,comp1060_seq2,comp1062_seq0,comp1070_seq1,comp107_seq0,comp108102_seq0,comp108_seq0,comp109_seq0,comp11085_seq1,comp111_seq0,comp1142_seq1,comp1158_seq0,comp116_seq1,comp11954_seq0,comp1195_seq0,comp1199_seq1,comp11_seq0,comp1201_seq2,comp1201_seq5,comp1203_seq1,comp120_seq0,comp1219_seq0,comp1239_seq2,comp1239_seq3,comp1256_seq0,…
GO:0044237	cellular metabolic process	2491	677	565.67	9.5e-15	3.08869e-12	1.19681	comp1003_seq0,comp10163_seq1,comp1018_seq0,comp1018_seq1,comp10192_seq1,comp101_seq0,comp10200_seq0,comp10213_seq1,comp10264_seq0,comp104_seq0,comp1051_seq0,comp1053_seq1,comp105_seq0,comp1060_seq1,comp1060_seq2,comp1062_seq0,comp1063_seq0,comp1070_seq1,comp10726_seq0,comp10726_seq1,comp107_seq0,comp108102_seq0,comp108_seq0,comp109_seq0,comp1105_seq1,comp11085_seq1,comp11103_seq1,comp1115_seq0,co…
GO:0010467	gene expression	1141	351	259.1	2.6e-13	7.514e-11	1.35469	comp1003_seq0,comp10192_seq1,comp101_seq0,comp104_seq0,comp105_seq0,comp1063_seq0,comp107_seq0,comp108102_seq0,comp108_seq0,comp109_seq0,comp1105_seq1,comp11103_seq1,comp1116_seq1,comp1116_seq2,comp1116_seq4,comp111_seq0,comp1142_seq1,comp1146_seq0,comp1158_seq0,comp116_seq1,comp1177_seq0,comp117_seq0,comp1182_seq2,comp1192_seq0,comp1195_seq0,comp11_seq0,comp1201_seq2,comp1201_seq5,comp1206_seq0,…
GO:0008152	metabolic process	2806	738	637.2	8.4e-13	2.18484e-10	1.15819	comp1003_seq0,comp1007_seq0,comp10163_seq1,comp1018_seq0,comp1018_seq1,comp10192_seq1,comp101_seq0,comp10200_seq0,comp10213_seq1,comp10264_seq0,comp1036_seq1,comp104_seq0,comp1051_seq0,comp1053_seq1,comp105_seq0,comp1060_seq1,comp1060_seq2,comp1062_seq0,comp1063_seq0,comp1070_seq1,comp10726_seq0,comp10726_seq1,comp107_seq0,comp108102_seq0,comp1085_seq2,comp1085_seq3,comp108_seq0,comp109_seq0,comp…
GO:0044249	cellular biosynthetic process	1175	357	266.82	1.1e-12	2.601e-10	1.33798	comp1018_seq0,comp1018_seq1,comp10192_seq1,comp101_seq0,comp10213_seq1,comp104_seq0,comp1053_seq1,comp105_seq0,comp1062_seq0,comp1063_seq0,comp10726_seq0,comp10726_seq1,comp107_seq0,comp108102_seq0,comp108_seq0,comp109_seq0,comp1105_seq1,comp11085_seq1,comp11103_seq1,comp1115_seq0,comp1115_seq1,comp111_seq0,comp11224_seq1,comp1142_seq1,comp1158_seq0,comp116_seq1,comp117_seq0,comp1182_seq2,comp119…
GO:0071704	organic substance metabolic process	2649	702	601.55	1.8e-12	3.9015e-10	1.16699	comp1003_seq0,comp1007_seq0,comp10163_seq1,comp1018_seq0,comp1018_seq1,comp10192_seq1,comp101_seq0,comp10200_seq0,comp10213_seq1,comp10264_seq0,comp1036_seq1,comp104_seq0,comp1051_seq0,comp1053_seq1,comp105_seq0,comp1060_seq1,comp1060_seq2,comp1062_seq0,comp1063_seq0,comp1070_seq1,comp10726_seq0,comp10726_seq1,comp107_seq0,comp108102_seq0,comp108_seq0,comp109_seq0,comp1105_seq1,comp11085_seq1,com…
GO:0009058	biosynthetic process	1231	369	279.54	3.1e-12	5.7222e-10	1.32003	comp1018_seq0,comp1018_seq1,comp10192_seq1,comp101_seq0,comp10213_seq1,comp104_seq0,comp1053_seq1,comp105_seq0,comp1062_seq0,comp1063_seq0,comp10726_seq0,comp10726_seq1,comp107_seq0,comp108102_seq0,comp108_seq0,comp109_seq0,comp1105_seq1,comp11085_seq1,comp11103_seq1,comp1115_seq0,comp1115_seq1,comp111_seq0,comp11224_seq1,comp1142_seq1,comp1158_seq0,comp116_seq1,comp117_seq0,comp1182_seq2,comp119…
GO:0006807	nitrogen compound metabolic process	1848	518	419.65	3.3e-12	5.7222e-10	1.23436	comp1003_seq0,comp10163_seq1,comp10192_seq1,comp101_seq0,comp10200_seq0,comp10213_seq1,comp10264_seq0,comp104_seq0,comp1051_seq0,comp1053_seq1,comp105_seq0,comp1060_seq1,comp1060_seq2,comp1062_seq0,comp1063_seq0,comp1070_seq1,comp107_seq0,comp108102_seq0,comp108_seq0,comp109_seq0,comp1105_seq1,comp11085_seq1,comp11103_seq1,comp1116_seq1,comp1116_seq2,comp1116_seq4,comp111_seq0,comp1142_seq1,comp1…
GO:0034641	cellular nitrogen compound metabolic pro...	1776	501	403.3	3.3e-12	5.7222e-10	1.24225	comp1003_seq0,comp10163_seq1,comp10192_seq1,comp101_seq0,comp10200_seq0,comp10213_seq1,comp10264_seq0,comp104_seq0,comp1051_seq0,comp1053_seq1,comp105_seq0,comp1060_seq1,comp1060_seq2,comp1063_seq0,comp107_seq0,comp108102_seq0,comp108_seq0,comp109_seq0,comp1105_seq1,comp11085_seq1,comp11103_seq1,comp1116_seq1,comp1116_seq2,comp1116_seq4,comp111_seq0,comp1142_seq1,comp1146_seq0,comp1158_seq0,comp1…
GO:0043170	macromolecule metabolic process	2042	563	463.71	3.9e-12	6.33994e-10	1.21412	comp1003_seq0,comp10163_seq1,comp1018_seq0,comp1018_seq1,comp10192_seq1,comp101_seq0,comp10200_seq0,comp10213_seq1,comp10264_seq0,comp1036_seq1,comp104_seq0,comp1051_seq0,comp105_seq0,comp1063_seq0,comp10726_seq0,comp10726_seq1,comp107_seq0,comp108102_seq0,comp108_seq0,comp109_seq0,comp1105_seq1,comp11103_seq1,comp1116_seq1,comp1116_seq2,comp1116_seq4,comp111_seq0,comp1142_seq1,comp1146_seq0,comp…
GO:0044260	cellular macromolecule metabolic process	1962	544	445.54	4.7e-12	7.191e-10	1.22099	comp1003_seq0,comp10163_seq1,comp1018_seq0,comp1018_seq1,comp10192_seq1,comp101_seq0,comp10200_seq0,comp10213_seq1,comp10264_seq0,comp104_seq0,comp1051_seq0,comp105_seq0,comp1063_seq0,comp10726_seq0,comp10726_seq1,comp107_seq0,comp108102_seq0,comp108_seq0,comp109_seq0,comp1105_seq1,comp11103_seq1,comp1116_seq1,comp1116_seq2,comp1116_seq4,comp111_seq0,comp1142_seq1,comp1146_seq0,comp11478_seq0,com…
GO:0044238	primary metabolic process	2517	670	571.57	6.6e-12	9.537e-10	1.17221	comp1003_seq0,comp10163_seq1,comp1018_seq0,comp1018_seq1,comp10192_seq1,comp101_seq0,comp10200_seq0,comp10213_seq1,comp10264_seq0,comp1036_seq1,comp104_seq0,comp1051_seq0,comp105_seq0,comp1060_seq1,comp1060_seq2,comp1062_seq0,comp1063_seq0,comp1070_seq1,comp10726_seq0,comp10726_seq1,comp107_seq0,comp108102_seq0,comp108_seq0,comp109_seq0,comp1105_seq1,comp11085_seq1,comp11103_seq1,comp1115_seq0,co…
GO:1901576	organic substance biosynthetic process	1187	353	269.55	4.4e-11	6.02337e-09	1.30959	comp10192_seq1,comp101_seq0,comp10213_seq1,comp104_seq0,comp1053_seq1,comp105_seq0,comp1062_seq0,comp1063_seq0,comp10726_seq0,comp10726_seq1,comp107_seq0,comp108102_seq0,comp108_seq0,comp109_seq0,comp1105_seq1,comp11085_seq1,comp11103_seq1,comp1115_seq0,comp1115_seq1,comp111_seq0,comp11224_seq1,comp1142_seq1,comp1158_seq0,comp116_seq1,comp117_seq0,comp1182_seq2,comp1192_seq0,comp1195_seq0,comp119…
GO:0044267	cellular protein metabolic process	758	241	172.13	1.9e-10	2.47095e-08	1.4001	comp1018_seq0,comp1018_seq1,comp101_seq0,comp104_seq0,comp105_seq0,comp10726_seq0,comp10726_seq1,comp107_seq0,comp108102_seq0,comp108_seq0,comp109_seq0,comp111_seq0,comp1142_seq1,comp11478_seq0,comp1158_seq0,comp116_seq1,comp1195_seq0,comp11_seq0,comp1201_seq2,comp1201_seq5,comp120_seq0,comp1238_seq0,comp1239_seq2,comp1256_seq0,comp1272_seq1,comp127_seq2,comp12854_seq0,comp12854_seq1,comp129_seq0…
GO:0034645	cellular macromolecule biosynthetic proc...	929	285	210.96	2.1e-10	2.48277e-08	1.35097	comp10192_seq1,comp101_seq0,comp10213_seq1,comp104_seq0,comp105_seq0,comp1063_seq0,comp10726_seq0,comp10726_seq1,comp107_seq0,comp108102_seq0,comp108_seq0,comp109_seq0,comp1105_seq1,comp11103_seq1,comp111_seq0,comp1142_seq1,comp1158_seq0,comp116_seq1,comp117_seq0,comp1182_seq2,comp1192_seq0,comp1195_seq0,comp11_seq0,comp1201_seq2,comp1201_seq5,comp1206_seq0,comp120_seq0,comp1239_seq2,comp1256_seq…
GO:0009059	macromolecule biosynthetic process	933	286	211.87	2.1e-10	2.48277e-08	1.34988	comp10192_seq1,comp101_seq0,comp10213_seq1,comp104_seq0,comp105_seq0,comp1063_seq0,comp10726_seq0,comp10726_seq1,comp107_seq0,comp108102_seq0,comp108_seq0,comp109_seq0,comp1105_seq1,comp11103_seq1,comp111_seq0,comp1142_seq1,comp1158_seq0,comp116_seq1,comp117_seq0,comp1182_seq2,comp1192_seq0,comp1195_seq0,comp11_seq0,comp1201_seq2,comp1201_seq5,comp1206_seq0,comp120_seq0,comp1239_seq2,comp1256_seq…
GO:0019538	protein metabolic process	801	250	181.89	6.5e-10	7.35065e-08	1.37446	comp1018_seq0,comp1018_seq1,comp101_seq0,comp1036_seq1,comp104_seq0,comp105_seq0,comp10726_seq0,comp10726_seq1,comp107_seq0,comp108102_seq0,comp108_seq0,comp109_seq0,comp111_seq0,comp1142_seq1,comp11478_seq0,comp1158_seq0,comp116_seq1,comp1195_seq0,comp11_seq0,comp1201_seq2,comp1201_seq5,comp120_seq0,comp1236_seq0,comp1238_seq0,comp1239_seq2,comp1256_seq0,comp1272_seq1,comp127_seq2,comp12854_seq0…
GO:0044271	cellular nitrogen compound biosynthetic ...	856	257	194.38	2.5e-08	2.70938e-06	1.32215	comp10192_seq1,comp101_seq0,comp104_seq0,comp1053_seq1,comp105_seq0,comp1063_seq0,comp107_seq0,comp108102_seq0,comp108_seq0,comp109_seq0,comp1105_seq1,comp11085_seq1,comp11103_seq1,comp111_seq0,comp1142_seq1,comp1158_seq0,comp116_seq1,comp117_seq0,comp1182_seq2,comp1192_seq0,comp1195_seq0,comp1199_seq1,comp11_seq0,comp1201_seq2,comp1201_seq5,comp1203_seq1,comp1206_seq0,comp120_seq0,comp1219_seq0,…
GO:0006396	RNA processing	350	108	79.48	0.00016	0.0160062	1.35883	comp1003_seq0,comp1116_seq1,comp1116_seq2,comp1116_seq4,comp1146_seq0,comp1177_seq0,comp1209_seq0,comp1209_seq1,comp1215_seq0,comp12295_seq1,comp1271_seq0,comp1387_seq2,comp1431_seq2,comp1433_seq2,comp1436_seq2,comp1563_seq1,comp1566_seq0,comp1809_seq5,comp1852_seq1,comp1913_seq0,comp1956_seq0,comp2004_seq0,comp2099_seq0,comp2099_seq1,comp2112_seq1,comp2198_seq0,comp2198_seq2,comp2269_seq0,comp22…
GO:0022613	ribonucleoprotein complex biogenesis	134	49	30.43	0.00016	0.0160062	1.61025	comp1201_seq2,comp1201_seq5,comp1239_seq2,comp1272_seq1,comp129_seq0,comp142_seq0,comp1431_seq2,comp1433_seq2,comp1436_seq2,comp1563_seq1,comp1566_seq0,comp1877_seq0,comp1913_seq0,comp2002_seq0,comp2002_seq3,comp2004_seq0,comp207_seq0,comp2099_seq0,comp2099_seq1,comp2242_seq0,comp2292_seq0,comp2581_seq0,comp2581_seq1,comp2600_seq0,comp2600_seq2,comp2632_seq0,comp265_seq0,comp265_seq1,comp2774_seq…

## Sheet: Cellular Component
Additional file 7: Table S5. Detailed information on GO term analysis in female up-regulated transcripts.
GO.ID	Term	Annotated	Significant	Expected	p-value	FDR-value	Enrichment	Transcripts
GO:0030529	intracellular ribonucleoprotein complex	391	193	86.69	1e-30	2.34e-28	2.22632	comp1003_seq0,comp101_seq0,comp104_seq0,comp105_seq0,comp107_seq0,comp108102_seq0,comp108_seq0,comp109_seq0,comp111_seq0,comp1142_seq1,comp1166_seq3,comp116_seq1,comp1177_seq0,comp11_seq0,comp1201_seq2,comp1201_seq5,comp120_seq0,comp1235_seq0,comp1239_seq2,comp1240_seq1,comp1272_seq1,comp127_seq2,comp129_seq0,comp131_seq0,comp1329_seq1,comp133_seq0,comp134_seq0,comp1387_seq2,comp1390_seq1,comp140…
GO:1990904	ribonucleoprotein complex	391	193	86.69	1e-30	2.34e-28	2.22632	comp1003_seq0,comp101_seq0,comp104_seq0,comp105_seq0,comp107_seq0,comp108102_seq0,comp108_seq0,comp109_seq0,comp111_seq0,comp1142_seq1,comp1166_seq3,comp116_seq1,comp1177_seq0,comp11_seq0,comp1201_seq2,comp1201_seq5,comp120_seq0,comp1235_seq0,comp1239_seq2,comp1240_seq1,comp1272_seq1,comp127_seq2,comp129_seq0,comp131_seq0,comp1329_seq1,comp133_seq0,comp134_seq0,comp1387_seq2,comp1390_seq1,comp140…
GO:0005840	ribosome	200	120	44.34	1e-30	2.34e-28	2.70636	comp101_seq0,comp104_seq0,comp105_seq0,comp107_seq0,comp108102_seq0,comp108_seq0,comp109_seq0,comp111_seq0,comp1142_seq1,comp1166_seq3,comp116_seq1,comp11_seq0,comp120_seq0,comp127_seq2,comp129_seq0,comp131_seq0,comp1329_seq1,comp133_seq0,comp134_seq0,comp140_seq0,comp1422_seq0,comp142_seq0,comp147_seq0,comp14_seq0,comp14_seq1,comp150_seq0,comp153_seq2,comp154_seq0,comp1571_seq0,comp1571_seq1,com…
GO:0044444	cytoplasmic part	921	340	204.19	5.6e-29	9.828e-27	1.66512	comp1003_seq0,comp1009_seq0,comp101_seq0,comp104_seq0,comp1055_seq0,comp1058_seq0,comp105_seq0,comp10726_seq0,comp10726_seq1,comp107_seq0,comp108102_seq0,comp108_seq0,comp109_seq0,comp111_seq0,comp1142_seq1,comp11478_seq0,comp1166_seq3,comp116_seq1,comp1190_seq1,comp11954_seq0,comp11_seq0,comp1201_seq2,comp1201_seq5,comp120_seq0,comp120_seq2,comp12289_seq0,comp1239_seq2,comp123_seq0,comp1244_seq1…
GO:0032991	macromolecular complex	1442	461	319.7	1.3e-23	1.8252e-21	1.44198	comp1003_seq0,comp101_seq0,comp10264_seq0,comp1036_seq1,comp104_seq0,comp1052_seq2,comp1058_seq0,comp105_seq0,comp107_seq0,comp108102_seq0,comp108_seq0,comp1092_seq0,comp109_seq0,comp1101_seq0,comp1105_seq1,comp11062_seq1,comp111_seq0,comp1142_seq1,comp1146_seq0,comp11478_seq0,comp1166_seq3,comp116_seq1,comp1177_seq0,comp117_seq0,comp1192_seq0,comp11954_seq0,comp11_seq0,comp1201_seq2,comp1201_seq…
GO:0005737	cytoplasm	1376	441	305.07	1.3e-22	1.521e-20	1.44557	comp1003_seq0,comp1009_seq0,comp101_seq0,comp1025_seq0,comp1037_seq1,comp104_seq0,comp1055_seq0,comp1058_seq0,comp105_seq0,comp10726_seq0,comp10726_seq1,comp107_seq0,comp108102_seq0,comp1088_seq2,comp108_seq0,comp1092_seq0,comp1099_seq3,comp109_seq0,comp11062_seq1,comp11085_seq1,comp111_seq0,comp1142_seq1,comp11478_seq0,comp1158_seq0,comp1166_seq3,comp116_seq1,comp1190_seq1,comp11954_seq0,comp119…
GO:0044424	intracellular part	2838	784	629.2	4.4e-22	4.41257e-20	1.24603	comp10003_seq2,comp1003_seq0,comp1009_seq0,comp10192_seq1,comp101_seq0,comp1025_seq0,comp10264_seq0,comp1036_seq1,comp1037_seq1,comp10382_seq1,comp104_seq0,comp1055_seq0,comp1058_seq0,comp105_seq0,comp1063_seq0,comp10726_seq0,comp10726_seq1,comp107_seq0,comp108102_seq0,comp1088_seq2,comp108_seq0,comp1092_seq0,comp1099_seq3,comp109_seq0,comp1105_seq1,comp11062_seq1,comp11085_seq1,comp11103_seq1,co…
GO:0005622	intracellular	3122	825	692.17	8e-17	7.02e-15	1.1919	comp10003_seq2,comp1003_seq0,comp1009_seq0,comp10192_seq1,comp101_seq0,comp1025_seq0,comp10264_seq0,comp1036_seq1,comp1037_seq1,comp10382_seq1,comp104_seq0,comp1055_seq0,comp1058_seq0,comp105_seq0,comp1063_seq0,comp10726_seq0,comp10726_seq1,comp107_seq0,comp108102_seq0,comp1088_seq2,comp108_seq0,comp1092_seq0,comp1099_seq3,comp109_seq0,comp1105_seq1,comp11062_seq1,comp11085_seq1,comp11103_seq1,co…
GO:0043229	intracellular organelle	2239	622	496.4	9e-16	7.02e-14	1.25302	comp10003_seq2,comp1003_seq0,comp1009_seq0,comp10192_seq1,comp101_seq0,comp10264_seq0,comp10382_seq1,comp104_seq0,comp1055_seq0,comp1058_seq0,comp105_seq0,comp1063_seq0,comp10726_seq0,comp10726_seq1,comp107_seq0,comp108102_seq0,comp108_seq0,comp1092_seq0,comp109_seq0,comp1105_seq1,comp11062_seq1,comp11103_seq1,comp111_seq0,comp11232_seq0,comp1142_seq1,comp1146_seq0,comp11478_seq0,comp115_seq2,com…
GO:0043226	organelle	2273	624	503.94	1.7e-14	1.1934e-12	1.23824	comp10003_seq2,comp1003_seq0,comp1009_seq0,comp10192_seq1,comp101_seq0,comp10264_seq0,comp10382_seq1,comp104_seq0,comp1052_seq2,comp1055_seq0,comp1058_seq0,comp105_seq0,comp1063_seq0,comp10726_seq0,comp10726_seq1,comp107_seq0,comp108102_seq0,comp108_seq0,comp1092_seq0,comp109_seq0,comp1101_seq0,comp1105_seq1,comp11062_seq1,comp11103_seq1,comp111_seq0,comp11232_seq0,comp1142_seq1,comp1146_seq0,com…
GO:0043228	non-membrane-bounded organelle	747	237	165.61	6.1e-11	3.5685e-09	1.43107	comp10003_seq2,comp1003_seq0,comp101_seq0,comp10264_seq0,comp104_seq0,comp105_seq0,comp107_seq0,comp108102_seq0,comp108_seq0,comp1092_seq0,comp109_seq0,comp1105_seq1,comp11062_seq1,comp111_seq0,comp1142_seq1,comp1166_seq3,comp116_seq1,comp117_seq0,comp1192_seq0,comp11_seq0,comp120_seq0,comp127_seq2,comp129_seq0,comp131_seq0,comp1324_seq1,comp1329_seq1,comp133_seq0,comp134_seq0,comp13_seq1,comp140…
GO:0043232	intracellular non-membrane-bounded organ...	747	237	165.61	6.1e-11	3.5685e-09	1.43107	comp10003_seq2,comp1003_seq0,comp101_seq0,comp10264_seq0,comp104_seq0,comp105_seq0,comp107_seq0,comp108102_seq0,comp108_seq0,comp1092_seq0,comp109_seq0,comp1105_seq1,comp11062_seq1,comp111_seq0,comp1142_seq1,comp1166_seq3,comp116_seq1,comp117_seq0,comp1192_seq0,comp11_seq0,comp120_seq0,comp127_seq2,comp129_seq0,comp131_seq0,comp1324_seq1,comp1329_seq1,comp133_seq0,comp134_seq0,comp13_seq1,comp140…
GO:0044446	intracellular organelle part	1159	339	256.96	1.9e-10	1.026e-08	1.31927	comp10003_seq2,comp1003_seq0,comp1009_seq0,comp10264_seq0,comp1055_seq0,comp1058_seq0,comp10726_seq0,comp10726_seq1,comp107_seq0,comp1092_seq0,comp1105_seq1,comp11062_seq1,comp1146_seq0,comp11478_seq0,comp1166_seq3,comp1177_seq0,comp117_seq0,comp1192_seq0,comp11954_seq0,comp12289_seq0,comp1244_seq1,comp1252_seq1,comp1266_seq1,comp1271_seq0,comp12854_seq0,comp12854_seq1,comp1287_seq0,comp1287_seq1…
GO:0044422	organelle part	1168	341	258.95	2.1e-10	1.053e-08	1.31686	comp10003_seq2,comp1003_seq0,comp1009_seq0,comp10264_seq0,comp1052_seq2,comp1055_seq0,comp1058_seq0,comp10726_seq0,comp10726_seq1,comp107_seq0,comp1092_seq0,comp1101_seq0,comp1105_seq1,comp11062_seq1,comp1146_seq0,comp11478_seq0,comp1166_seq3,comp1177_seq0,comp117_seq0,comp1192_seq0,comp11954_seq0,comp12289_seq0,comp1244_seq1,comp1252_seq1,comp1266_seq1,comp1271_seq0,comp12854_seq0,comp12854_seq1…
GO:0043227	membrane-bounded organelle	1730	474	383.55	6e-10	2.808e-08	1.23582	comp1003_seq0,comp1009_seq0,comp10192_seq1,comp10264_seq0,comp10382_seq1,comp1055_seq0,comp1058_seq0,comp1063_seq0,comp10726_seq0,comp10726_seq1,comp1105_seq1,comp11103_seq1,comp11232_seq0,comp1146_seq0,comp11478_seq0,comp115_seq2,comp1166_seq3,comp1177_seq0,comp117_seq0,comp1190_seq1,comp1192_seq0,comp11954_seq0,comp1203_seq1,comp1206_seq0,comp12289_seq0,comp12295_seq1,comp1238_seq0,comp123_seq0…
GO:0043231	intracellular membrane-bounded organelle	1680	462	372.47	6.5e-10	2.85187e-08	1.24037	comp1003_seq0,comp1009_seq0,comp10192_seq1,comp10264_seq0,comp10382_seq1,comp1055_seq0,comp1058_seq0,comp1063_seq0,comp10726_seq0,comp10726_seq1,comp1105_seq1,comp11103_seq1,comp11232_seq0,comp1146_seq0,comp115_seq2,comp1166_seq3,comp1177_seq0,comp117_seq0,comp1192_seq0,comp11954_seq0,comp1203_seq1,comp1206_seq0,comp12289_seq0,comp12295_seq1,comp1238_seq0,comp123_seq0,comp1252_seq1,comp1266_seq1,…
GO:0005623	cell	3450	861	764.89	8.1e-10	3.34482e-08	1.12565	comp10003_seq2,comp1003_seq0,comp1007_seq0,comp1009_seq0,comp10192_seq1,comp101_seq0,comp1025_seq0,comp10264_seq0,comp1036_seq1,comp1037_seq1,comp10382_seq1,comp104_seq0,comp1052_seq2,comp1055_seq0,comp1058_seq0,comp105_seq0,comp1063_seq0,comp10726_seq0,comp10726_seq1,comp107_seq0,comp108102_seq0,comp1088_seq2,comp108_seq0,comp1092_seq0,comp1099_seq3,comp109_seq0,comp1100_seq3,comp1100_seq4,comp1…
GO:0005740	mitochondrial envelope	113	52	25.05	1.2e-08	4.68e-07	2.07585	comp11954_seq0,comp1252_seq1,comp148_seq0,comp148_seq1,comp1569_seq0,comp1569_seq1,comp1587_seq0,comp1587_seq1,comp1780_seq1,comp1901_seq1,comp2102_seq2,comp222_seq0,comp2438_seq2,comp260_seq0,comp2887_seq0,comp2887_seq1,comp2_seq4,comp308_seq0,comp3142_seq0,comp3142_seq1,comp326_seq1,comp326_seq3,comp336_seq0,comp3399_seq1,comp340_seq0,comp3428_seq0,comp393_seq0,comp393_seq1,comp4132_seq1,comp44…
GO:0044464	cell part	3402	842	754.24	2.1e-08	7.75895e-07	1.11636	comp10003_seq2,comp1003_seq0,comp1009_seq0,comp10192_seq1,comp101_seq0,comp1025_seq0,comp10264_seq0,comp1036_seq1,comp1037_seq1,comp10382_seq1,comp104_seq0,comp1052_seq2,comp1055_seq0,comp1058_seq0,comp105_seq0,comp1063_seq0,comp10726_seq0,comp10726_seq1,comp107_seq0,comp108102_seq0,comp1088_seq2,comp108_seq0,comp1092_seq0,comp1099_seq3,comp109_seq0,comp1100_seq3,comp1100_seq4,comp1101_seq0,comp1…
GO:0032993	protein-DNA complex	40	25	8.87	4.4e-08	1.5444e-06	2.81849	comp117_seq0,comp143_seq2,comp151_seq2,comp169_seq4,comp169_seq5,comp1876_seq0,comp1928_seq0,comp211_seq0,comp232_seq0,comp25_seq0,comp2629_seq0,comp2795_seq1,comp353_seq0,comp4168_seq0,comp4606_seq0,comp4943_seq1,comp520_seq0,comp5323_seq0,comp5553_seq1,comp6220_seq0,comp7025_seq0,comp7669_seq1,comp7669_seq2,comp7932_seq1,comp9439_seq2
GO:0005739	mitochondrion	252	92	55.87	8.6e-08	2.87486e-06	1.64668	comp1055_seq0,comp1166_seq3,comp11954_seq0,comp1252_seq1,comp1318_seq1,comp1422_seq0,comp148_seq0,comp148_seq1,comp1533_seq0,comp1569_seq0,comp1569_seq1,comp1587_seq0,comp1587_seq1,comp1649_seq0,comp1780_seq1,comp1793_seq0,comp1802_seq1,comp1873_seq1,comp1901_seq1,comp2102_seq2,comp2204_seq0,comp2204_seq1,comp222_seq0,comp228_seq1,comp2438_seq2,comp260_seq0,comp264_seq0,comp2715_seq2,comp2887_seq…
GO:0044391	ribosomal subunit	45	26	9.98	2.2e-07	7.02e-06	2.60521	comp107_seq0,comp1166_seq3,comp129_seq0,comp134_seq0,comp193_seq0,comp2_seq7,comp2_seq8,comp3460_seq2,comp3499_seq0,comp3499_seq1,comp3654_seq0,comp3792_seq1,comp3993_seq0,comp4104_seq1,comp51_seq0,comp52_seq0,comp6204_seq0,comp63_seq0,comp69_seq0,comp76_seq0,comp78_seq0,comp83_seq0,comp861_seq2,comp887_seq0,comp91_seq0,comp92_seq0
GO:1905368	peptidase complex	56	30	12.42	2.6e-07	7.93565e-06	2.41546	comp1036_seq1,comp1236_seq0,comp1238_seq0,comp18782_seq1,comp195_seq0,comp208_seq0,comp2316_seq0,comp268_seq0,comp2_seq9,comp391_seq0,comp425_seq1,comp425_seq2,comp427_seq0,comp511_seq0,comp536_seq3,comp553_seq0,comp615_seq0,comp615_seq1,comp626_seq3,comp630_seq0,comp676_seq0,comp808_seq0,comp811_seq0,comp814_seq0,comp8440_seq0,comp845_seq0,comp907_seq1,comp963_seq0,comp978_seq0,comp997_seq0
GO:0005783	endoplasmic reticulum	135	56	29.93	2.9e-07	8.4825e-06	1.87103	comp1009_seq0,comp12289_seq0,comp123_seq0,comp12854_seq0,comp12854_seq1,comp141_seq1,comp1430_seq3,comp1609_seq0,comp177_seq0,comp1820_seq0,comp1820_seq1,comp1850_seq3,comp194_seq0,comp195_seq0,comp1986_seq0,comp1986_seq2,comp2121_seq0,comp2233_seq2,comp239_seq0,comp2532_seq1,comp2568_seq0,comp2590_seq1,comp2622_seq0,comp2735_seq2,comp3177_seq1,comp3511_seq1,comp3544_seq3,comp35_seq0,comp374_seq0…
GO:0000786	nucleosome	26	18	5.76	3.7e-07	1.026e-05	3.125	comp117_seq0,comp143_seq2,comp151_seq2,comp169_seq4,comp169_seq5,comp1876_seq0,comp211_seq0,comp232_seq0,comp25_seq0,comp2629_seq0,comp353_seq0,comp4168_seq0,comp520_seq0,comp5323_seq0,comp6220_seq0,comp7025_seq0,comp7669_seq1,comp7669_seq2
GO:0031966	mitochondrial membrane	101	45	22.39	3.8e-07	1.026e-05	2.00983	comp11954_seq0,comp148_seq0,comp148_seq1,comp1569_seq0,comp1569_seq1,comp1587_seq0,comp1587_seq1,comp1780_seq1,comp1901_seq1,comp2102_seq2,comp222_seq0,comp2438_seq2,comp260_seq0,comp2887_seq0,comp2887_seq1,comp2_seq4,comp308_seq0,comp336_seq0,comp3399_seq1,comp340_seq0,comp3428_seq0,comp393_seq0,comp393_seq1,comp4132_seq1,comp4457_seq0,comp4457_seq1,comp492_seq0,comp492_seq4,comp512_seq0,comp569…
GO:0044429	mitochondrial part	167	65	37.02	5.3e-07	1.378e-05	1.75581	comp1055_seq0,comp1166_seq3,comp11954_seq0,comp1252_seq1,comp1318_seq1,comp148_seq0,comp148_seq1,comp1569_seq0,comp1569_seq1,comp1587_seq0,comp1587_seq1,comp1649_seq0,comp1780_seq1,comp1901_seq1,comp2102_seq2,comp2204_seq0,comp2204_seq1,comp222_seq0,comp2438_seq2,comp260_seq0,comp2715_seq2,comp2887_seq0,comp2887_seq1,comp2_seq4,comp308_seq0,comp3142_seq0,comp3142_seq1,comp326_seq1,comp326_seq3,co…
GO:0005789	endoplasmic reticulum membrane	97	42	21.51	2.3e-06	5.56759e-05	1.95258	comp1009_seq0,comp12289_seq0,comp12854_seq0,comp12854_seq1,comp1430_seq3,comp1609_seq0,comp1820_seq0,comp1820_seq1,comp1850_seq3,comp195_seq0,comp1986_seq0,comp1986_seq2,comp2233_seq2,comp239_seq0,comp2532_seq1,comp2568_seq0,comp2590_seq1,comp2735_seq2,comp3511_seq1,comp3544_seq3,comp374_seq0,comp390_seq1,comp391_seq0,comp442_seq0,comp4480_seq2,comp486_seq0,comp4961_seq2,comp530_seq0,comp564_seq0…
GO:0044432	endoplasmic reticulum part	97	42	21.51	2.3e-06	5.56759e-05	1.95258	comp1009_seq0,comp12289_seq0,comp12854_seq0,comp12854_seq1,comp1430_seq3,comp1609_seq0,comp1820_seq0,comp1820_seq1,comp1850_seq3,comp195_seq0,comp1986_seq0,comp1986_seq2,comp2233_seq2,comp239_seq0,comp2532_seq1,comp2568_seq0,comp2590_seq1,comp2735_seq2,comp3511_seq1,comp3544_seq3,comp374_seq0,comp390_seq1,comp391_seq0,comp442_seq0,comp4480_seq2,comp486_seq0,comp4961_seq2,comp530_seq0,comp564_seq0…
GO:0044815	DNA packaging complex	31	19	6.87	2.9e-06	6.786e-05	2.76565	comp11062_seq1,comp117_seq0,comp143_seq2,comp151_seq2,comp169_seq4,comp169_seq5,comp1876_seq0,comp211_seq0,comp232_seq0,comp25_seq0,comp2629_seq0,comp353_seq0,comp4168_seq0,comp520_seq0,comp5323_seq0,comp6220_seq0,comp7025_seq0,comp7669_seq1,comp7669_seq2
GO:0000502	proteasome complex	50	26	11.09	3.5e-06	7.67812e-05	2.34445	comp1036_seq1,comp1236_seq0,comp1238_seq0,comp18782_seq1,comp208_seq0,comp2316_seq0,comp268_seq0,comp2_seq9,comp425_seq1,comp425_seq2,comp427_seq0,comp511_seq0,comp536_seq3,comp553_seq0,comp615_seq0,comp615_seq1,comp626_seq3,comp676_seq0,comp808_seq0,comp811_seq0,comp814_seq0,comp8440_seq0,comp907_seq1,comp963_seq0,comp978_seq0,comp997_seq0
GO:1905369	endopeptidase complex	50	26	11.09	3.5e-06	7.67812e-05	2.34445	comp1036_seq1,comp1236_seq0,comp1238_seq0,comp18782_seq1,comp208_seq0,comp2316_seq0,comp268_seq0,comp2_seq9,comp425_seq1,comp425_seq2,comp427_seq0,comp511_seq0,comp536_seq3,comp553_seq0,comp615_seq0,comp615_seq1,comp626_seq3,comp676_seq0,comp808_seq0,comp811_seq0,comp814_seq0,comp8440_seq0,comp907_seq1,comp963_seq0,comp978_seq0,comp997_seq0
GO:0005743	mitochondrial inner membrane	80	36	17.74	4.2e-06	8.93455e-05	2.02931	comp11954_seq0,comp148_seq0,comp148_seq1,comp1569_seq0,comp1569_seq1,comp1780_seq1,comp1901_seq1,comp2102_seq2,comp222_seq0,comp2438_seq2,comp260_seq0,comp2887_seq0,comp2887_seq1,comp2_seq4,comp336_seq0,comp3399_seq1,comp340_seq0,comp3428_seq0,comp4132_seq1,comp492_seq0,comp492_seq4,comp569_seq0,comp587_seq1,comp589_seq0,comp6171_seq0,comp617_seq0,comp658_seq0,comp664_seq0,comp6757_seq1,comp678_s…
GO:0019013	viral nucleocapsid	46	24	10.2	7.7e-06	0.000158982	2.35294	comp1463_seq0,comp1463_seq1,comp1463_seq2,comp1518_seq0,comp162_seq0,comp162_seq1,comp171_seq0,comp171_seq1,comp288_seq0,comp311_seq0,comp351_seq0,comp3749_seq1,comp3749_seq2,comp395_seq0,comp440_seq0,comp440_seq1,comp451_seq0,comp458_seq0,comp458_seq3,comp598_seq0,comp777_seq0,comp777_seq1,comp866_seq1,comp882_seq0
GO:0042175	nuclear outer membrane-endoplasmic retic...	101	42	22.39	8.2e-06	0.0001638	1.87584	comp1009_seq0,comp12289_seq0,comp12854_seq0,comp12854_seq1,comp1430_seq3,comp1609_seq0,comp1820_seq0,comp1820_seq1,comp1850_seq3,comp195_seq0,comp1986_seq0,comp1986_seq2,comp2233_seq2,comp239_seq0,comp2532_seq1,comp2568_seq0,comp2590_seq1,comp2735_seq2,comp3511_seq1,comp3544_seq3,comp374_seq0,comp390_seq1,comp391_seq0,comp442_seq0,comp4480_seq2,comp486_seq0,comp4961_seq2,comp530_seq0,comp564_seq0…
GO:0031090	organelle membrane	225	78	49.88	8.4e-06	0.0001638	1.56375	comp1058_seq0,comp10726_seq0,comp10726_seq1,comp11478_seq0,comp11954_seq0,comp12289_seq0,comp1244_seq1,comp1337_seq0,comp1391_seq0,comp141_seq1,comp148_seq0,comp148_seq1,comp155_seq0,comp1569_seq0,comp1569_seq1,comp1587_seq0,comp1587_seq1,comp1780_seq1,comp1884_seq1,comp1901_seq1,comp2018_seq0,comp2102_seq2,comp2105_seq1,comp2111_seq0,comp222_seq0,comp2295_seq0,comp2438_seq2,comp2440_seq0,comp260…
GO:0019012	virion	47	24	10.42	1.2e-05	0.000216	2.30326	comp1463_seq0,comp1463_seq1,comp1463_seq2,comp1518_seq0,comp162_seq0,comp162_seq1,comp171_seq0,comp171_seq1,comp288_seq0,comp311_seq0,comp351_seq0,comp3749_seq1,comp3749_seq2,comp395_seq0,comp440_seq0,comp440_seq1,comp451_seq0,comp458_seq0,comp458_seq3,comp598_seq0,comp777_seq0,comp777_seq1,comp866_seq1,comp882_seq0
GO:0019028	viral capsid	47	24	10.42	1.2e-05	0.000216	2.30326	comp1463_seq0,comp1463_seq1,comp1463_seq2,comp1518_seq0,comp162_seq0,comp162_seq1,comp171_seq0,comp171_seq1,comp288_seq0,comp311_seq0,comp351_seq0,comp3749_seq1,comp3749_seq2,comp395_seq0,comp440_seq0,comp440_seq1,comp451_seq0,comp458_seq0,comp458_seq3,comp598_seq0,comp777_seq0,comp777_seq1,comp866_seq1,comp882_seq0
GO:0044423	virion part	47	24	10.42	1.2e-05	0.000216	2.30326	comp1463_seq0,comp1463_seq1,comp1463_seq2,comp1518_seq0,comp162_seq0,comp162_seq1,comp171_seq0,comp171_seq1,comp288_seq0,comp311_seq0,comp351_seq0,comp3749_seq1,comp3749_seq2,comp395_seq0,comp440_seq0,comp440_seq1,comp451_seq0,comp458_seq0,comp458_seq3,comp598_seq0,comp777_seq0,comp777_seq1,comp866_seq1,comp882_seq0
GO:0031967	organelle envelope	154	57	34.14	1.6e-05	0.000273951	1.6696	comp11954_seq0,comp1252_seq1,comp148_seq0,comp148_seq1,comp1569_seq0,comp1569_seq1,comp1587_seq0,comp1587_seq1,comp1780_seq1,comp1884_seq1,comp1901_seq1,comp2102_seq2,comp222_seq0,comp2438_seq2,comp260_seq0,comp2887_seq0,comp2887_seq1,comp2_seq4,comp308_seq0,comp3142_seq0,comp3142_seq1,comp326_seq1,comp326_seq3,comp336_seq0,comp3399_seq1,comp340_seq0,comp3428_seq0,comp393_seq0,comp393_seq1,comp41…
GO:0031975	envelope	154	57	34.14	1.6e-05	0.000273951	1.6696	comp11954_seq0,comp1252_seq1,comp148_seq0,comp148_seq1,comp1569_seq0,comp1569_seq1,comp1587_seq0,comp1587_seq1,comp1780_seq1,comp1884_seq1,comp1901_seq1,comp2102_seq2,comp222_seq0,comp2438_seq2,comp260_seq0,comp2887_seq0,comp2887_seq1,comp2_seq4,comp308_seq0,comp3142_seq0,comp3142_seq1,comp326_seq1,comp326_seq3,comp336_seq0,comp3399_seq1,comp340_seq0,comp3428_seq0,comp393_seq0,comp393_seq1,comp41…
GO:0019866	organelle inner membrane	85	36	18.85	2.2e-05	0.000367714	1.90981	comp11954_seq0,comp148_seq0,comp148_seq1,comp1569_seq0,comp1569_seq1,comp1780_seq1,comp1901_seq1,comp2102_seq2,comp222_seq0,comp2438_seq2,comp260_seq0,comp2887_seq0,comp2887_seq1,comp2_seq4,comp336_seq0,comp3399_seq1,comp340_seq0,comp3428_seq0,comp4132_seq1,comp492_seq0,comp492_seq4,comp569_seq0,comp587_seq1,comp589_seq0,comp6171_seq0,comp617_seq0,comp658_seq0,comp664_seq0,comp6757_seq1,comp678_s…
GO:0044455	mitochondrial membrane part	41	21	9.09	4.1e-05	0.000669349	2.31023	comp11954_seq0,comp148_seq0,comp148_seq1,comp1569_seq0,comp1569_seq1,comp2438_seq2,comp260_seq0,comp2887_seq0,comp2887_seq1,comp308_seq0,comp336_seq0,comp340_seq0,comp4132_seq1,comp492_seq0,comp492_seq4,comp569_seq0,comp664_seq0,comp6757_seq1,comp701_seq1,comp983_seq1,comp983_seq2
GO:0005839	proteasome core complex	20	13	4.43	4.7e-05	0.000749864	2.93454	comp1238_seq0,comp18782_seq1,comp2_seq9,comp425_seq1,comp425_seq2,comp427_seq0,comp511_seq0,comp615_seq0,comp615_seq1,comp626_seq3,comp808_seq0,comp963_seq0,comp978_seq0
GO:0098798	mitochondrial protein complex	28	16	6.21	6.1e-05	0.0009516	2.57649	comp11954_seq0,comp148_seq0,comp148_seq1,comp2438_seq2,comp260_seq0,comp308_seq0,comp336_seq0,comp340_seq0,comp4132_seq1,comp492_seq0,comp492_seq4,comp569_seq0,comp664_seq0,comp701_seq1,comp983_seq1,comp983_seq2
GO:0098800	inner mitochondrial membrane protein com...	26	15	5.76	8.9e-05	0.00135822	2.60417	comp11954_seq0,comp148_seq0,comp148_seq1,comp2438_seq2,comp260_seq0,comp336_seq0,comp340_seq0,comp4132_seq1,comp492_seq0,comp492_seq4,comp569_seq0,comp664_seq0,comp701_seq1,comp983_seq1,comp983_seq2
GO:0031974	membrane-enclosed lumen	329	101	72.94	0.00014	0.00200571	1.3847	comp10264_seq0,comp1055_seq0,comp1105_seq1,comp1166_seq3,comp1192_seq0,comp1266_seq1,comp1271_seq0,comp1287_seq0,comp1287_seq1,comp1318_seq1,comp1408_seq1,comp1433_seq2,comp1440_seq0,comp1440_seq1,comp1554_seq0,comp1566_seq0,comp16442_seq1,comp1649_seq0,comp1809_seq5,comp1814_seq0,comp1814_seq1,comp1814_seq2,comp1839_seq1,comp1884_seq1,comp1928_seq0,comp2002_seq0,comp2002_seq3,comp2204_seq0,comp2…
GO:0043233	organelle lumen	329	101	72.94	0.00014	0.00200571	1.3847	comp10264_seq0,comp1055_seq0,comp1105_seq1,comp1166_seq3,comp1192_seq0,comp1266_seq1,comp1271_seq0,comp1287_seq0,comp1287_seq1,comp1318_seq1,comp1408_seq1,comp1433_seq2,comp1440_seq0,comp1440_seq1,comp1554_seq0,comp1566_seq0,comp16442_seq1,comp1649_seq0,comp1809_seq5,comp1814_seq0,comp1814_seq1,comp1814_seq2,comp1839_seq1,comp1884_seq1,comp1928_seq0,comp2002_seq0,comp2002_seq3,comp2204_seq0,comp2…
GO:0070013	intracellular organelle lumen	329	101	72.94	0.00014	0.00200571	1.3847	comp10264_seq0,comp1055_seq0,comp1105_seq1,comp1166_seq3,comp1192_seq0,comp1266_seq1,comp1271_seq0,comp1287_seq0,comp1287_seq1,comp1318_seq1,comp1408_seq1,comp1433_seq2,comp1440_seq0,comp1440_seq1,comp1554_seq0,comp1566_seq0,comp16442_seq1,comp1649_seq0,comp1809_seq5,comp1814_seq0,comp1814_seq1,comp1814_seq2,comp1839_seq1,comp1884_seq1,comp1928_seq0,comp2002_seq0,comp2002_seq3,comp2204_seq0,comp2…
GO:0015934	large ribosomal subunit	30	16	6.65	0.00018	0.0025272	2.40602	comp1166_seq3,comp193_seq0,comp2_seq7,comp3460_seq2,comp3499_seq0,comp3499_seq1,comp3654_seq0,comp3792_seq1,comp4104_seq1,comp52_seq0,comp6204_seq0,comp63_seq0,comp83_seq0,comp861_seq2,comp887_seq0,comp91_seq0
GO:0031981	nuclear lumen	267	84	59.2	0.00021	0.002835	1.41892	comp10264_seq0,comp1105_seq1,comp1192_seq0,comp1266_seq1,comp1271_seq0,comp1287_seq0,comp1287_seq1,comp1408_seq1,comp1433_seq2,comp1440_seq0,comp1440_seq1,comp1554_seq0,comp1566_seq0,comp16442_seq1,comp1809_seq5,comp1814_seq0,comp1814_seq1,comp1814_seq2,comp1839_seq1,comp1884_seq1,comp1928_seq0,comp2002_seq0,comp2002_seq3,comp2268_seq1,comp2292_seq0,comp2415_seq0,comp2612_seq0,comp2632_seq0,comp2…
GO:0044427	chromosomal part	117	43	25.94	0.00021	0.002835	1.65767	comp10264_seq0,comp1105_seq1,comp11062_seq1,comp117_seq0,comp143_seq2,comp151_seq2,comp1554_seq0,comp169_seq4,comp169_seq5,comp1876_seq0,comp1928_seq0,comp211_seq0,comp232_seq0,comp25_seq0,comp2629_seq0,comp274_seq4,comp2795_seq1,comp3060_seq2,comp3210_seq1,comp353_seq0,comp4168_seq0,comp4468_seq1,comp4493_seq1,comp4493_seq2,comp4493_seq3,comp4606_seq0,comp4835_seq0,comp4943_seq1,comp520_seq0,com…
GO:0015935	small ribosomal subunit	15	10	3.33	0.00028	0.00370868	3.003	comp107_seq0,comp129_seq0,comp134_seq0,comp2_seq8,comp3993_seq0,comp51_seq0,comp69_seq0,comp76_seq0,comp78_seq0,comp92_seq0
GO:0000785	chromatin	43	20	9.53	0.00034	0.00442	2.09864	comp117_seq0,comp143_seq2,comp151_seq2,comp1554_seq0,comp169_seq4,comp169_seq5,comp1876_seq0,comp211_seq0,comp232_seq0,comp25_seq0,comp2629_seq0,comp274_seq4,comp353_seq0,comp4168_seq0,comp520_seq0,comp5323_seq0,comp6220_seq0,comp7025_seq0,comp7669_seq1,comp7669_seq2
GO:0044445	cytosolic part	11	8	2.44	0.00049	0.00625418	3.27869	comp107_seq0,comp120_seq2,comp129_seq0,comp193_seq0,comp3792_seq1,comp5089_seq0,comp78_seq0,comp907_seq1
GO:0022626	cytosolic ribosome	5	5	1.11	0.00053	0.00664393	4.5045	comp107_seq0,comp129_seq0,comp193_seq0,comp3792_seq1,comp78_seq0
GO:0045259	proton-transporting ATP synthase complex	9	7	2	0.00061	0.00751263	3.5	comp128_seq0,comp260_seq0,comp321_seq0,comp340_seq0,comp396_seq0,comp492_seq0,comp492_seq4
GO:0008250	oligosaccharyltransferase complex	7	6	1.55	0.00067	0.00797186	3.87097	comp12854_seq0,comp12854_seq1,comp239_seq0,comp374_seq0,comp390_seq1,comp739_seq0
GO:0042555	MCM complex	7	6	1.55	0.00067	0.00797186	3.87097	comp2608_seq1,comp4540_seq0,comp5326_seq0,comp5326_seq1,comp5607_seq1,comp686_seq0
GO:0098796	membrane protein complex	152	51	33.7	0.00073	0.008541	1.51335	comp1058_seq0,comp11478_seq0,comp11954_seq0,comp12289_seq0,comp12388_seq0,comp1244_seq1,comp128_seq0,comp1337_seq0,comp1391_seq0,comp1444_seq2,comp148_seq0,comp148_seq1,comp155_seq0,comp195_seq0,comp2018_seq0,comp2105_seq1,comp2364_seq2,comp2438_seq2,comp260_seq0,comp308_seq0,comp321_seq0,comp336_seq0,comp340_seq0,comp3843_seq1,comp391_seq0,comp396_seq0,comp4132_seq1,comp423_seq0,comp428_seq0,com…
GO:0070469	respiratory chain	23	12	5.1	0.00154	0.0177226	2.35294	comp11954_seq0,comp148_seq0,comp148_seq1,comp264_seq0,comp2_seq4,comp336_seq0,comp560_seq1,comp569_seq0,comp658_seq0,comp664_seq0,comp678_seq2,comp701_seq1
GO:0016469	proton-transporting two-sector ATPase co...	32	15	7.09	0.00168	0.0190219	2.11566	comp128_seq0,comp155_seq0,comp260_seq0,comp321_seq0,comp340_seq0,comp396_seq0,comp423_seq0,comp428_seq0,comp428_seq1,comp457_seq0,comp492_seq0,comp492_seq4,comp548_seq3,comp964_seq3,comp984_seq1
GO:0005694	chromosome	143	47	31.7	0.00188	0.0209486	1.48265	comp10264_seq0,comp1105_seq1,comp11062_seq1,comp117_seq0,comp1408_seq1,comp143_seq2,comp151_seq2,comp1554_seq0,comp169_seq4,comp169_seq5,comp1876_seq0,comp1928_seq0,comp211_seq0,comp232_seq0,comp25_seq0,comp2629_seq0,comp274_seq4,comp2795_seq1,comp3060_seq2,comp3210_seq1,comp353_seq0,comp4168_seq0,comp4468_seq1,comp4493_seq1,comp4493_seq2,comp4493_seq3,comp4578_seq2,comp4606_seq0,comp4835_seq0,co…
GO:0005787	signal peptidase complex	4	4	0.89	0.00241	0.0261655	4.49438	comp195_seq0,comp391_seq0,comp630_seq0,comp845_seq0
GO:0044428	nuclear part	419	117	92.89	0.00244	0.0261655	1.25955	comp1003_seq0,comp10264_seq0,comp1105_seq1,comp1146_seq0,comp1177_seq0,comp1192_seq0,comp1266_seq1,comp1271_seq0,comp1287_seq0,comp1287_seq1,comp1339_seq3,comp1387_seq2,comp1408_seq1,comp1431_seq2,comp1433_seq2,comp1436_seq2,comp1440_seq0,comp1440_seq1,comp1554_seq0,comp1566_seq0,comp16442_seq1,comp1809_seq5,comp1814_seq0,comp1814_seq1,comp1814_seq2,comp1839_seq1,comp1884_seq1,comp1928_seq0,comp2…
GO:0005730	nucleolus	83	30	18.4	0.00246	0.0261655	1.63043	comp1192_seq0,comp1433_seq2,comp1566_seq0,comp16442_seq1,comp1809_seq5,comp1814_seq0,comp1814_seq1,comp1814_seq2,comp2002_seq0,comp2002_seq3,comp2292_seq0,comp2632_seq0,comp265_seq0,comp265_seq1,comp2828_seq0,comp3200_seq0,comp3793_seq0,comp461_seq0,comp4683_seq0,comp4903_seq0,comp4950_seq4,comp5051_seq0,comp5051_seq1,comp5714_seq2,comp5714_seq3,comp6657_seq0,comp6722_seq1,comp831_seq0,comp831_se…

## Sheet: Molecular Function
Additional file 7: Table S5. Detailed information on GO term analysis in female up-regulated transcripts.
GO.ID	Term	Annotated	Significant	Expected	p-value	FDR-value	Enrichment	Transcripts
GO:0003735	structural constituent of ribosome	160	98	32.08	1.2e-30	1.8336e-27	3.05486	comp101_seq0,comp104_seq0,comp105_seq0,comp107_seq0,comp108102_seq0,comp108_seq0,comp109_seq0,comp111_seq0,comp1142_seq1,comp1166_seq3,comp116_seq1,comp11_seq0,comp120_seq0,comp127_seq2,comp129_seq0,comp131_seq0,comp134_seq0,comp140_seq0,comp147_seq0,comp14_seq0,comp14_seq1,comp150_seq0,comp153_seq2,comp154_seq0,comp1571_seq0,comp1571_seq1,comp160_seq0,comp161_seq0,comp1649_seq0,comp1660_seq0,com…
GO:0005198	structural molecule activity	250	110	50.12	2e-18	1.528e-15	2.19473	comp101_seq0,comp104_seq0,comp1058_seq0,comp105_seq0,comp107_seq0,comp108102_seq0,comp108_seq0,comp109_seq0,comp1105_seq1,comp111_seq0,comp1142_seq1,comp1166_seq3,comp116_seq1,comp11_seq0,comp120_seq0,comp127_seq2,comp129_seq0,comp131_seq0,comp1337_seq0,comp134_seq0,comp140_seq0,comp1468_seq0,comp147_seq0,comp14_seq0,comp14_seq1,comp150_seq0,comp153_seq2,comp154_seq0,comp1571_seq0,comp1571_seq1,c…
GO:0003723	RNA binding	665	208	133.33	4.3e-13	2.19013e-10	1.56004	comp1003_seq0,comp1028_seq0,comp1028_seq4,comp1028_seq7,comp105_seq0,comp1116_seq1,comp1116_seq2,comp1116_seq4,comp1146_seq0,comp11516_seq0,comp1152_seq0,comp1174_seq1,comp1201_seq2,comp1201_seq5,comp1213_seq0,comp12295_seq1,comp1239_seq2,comp1256_seq0,comp1271_seq0,comp1272_seq1,comp1307_seq1,comp1323_seq1,comp134_seq0,comp1379_seq0,comp1379_seq1,comp1390_seq1,comp1431_seq2,comp1436_seq2,comp146…
GO:0046982	protein heterodimerization activity	45	28	9.02	7.2e-10	2.7504e-07	3.10421	comp1072_seq0,comp1072_seq1,comp1072_seq2,comp1072_seq3,comp1072_seq4,comp117_seq0,comp143_seq2,comp1477_seq0,comp169_seq4,comp169_seq5,comp1876_seq0,comp201_seq0,comp201_seq1,comp211_seq0,comp232_seq0,comp2394_seq3,comp25_seq0,comp2629_seq0,comp2918_seq0,comp353_seq0,comp4168_seq0,comp520_seq0,comp6220_seq0,comp7025_seq0,comp7669_seq1,comp7669_seq2,comp791_seq0,comp840_seq0
GO:0015078	hydrogen ion transmembrane transporter a...	56	27	11.23	2e-06	0.0006112	2.40427	comp1252_seq1,comp128_seq0,comp155_seq0,comp1663_seq0,comp1663_seq1,comp228_seq0,comp260_seq0,comp2_seq4,comp301_seq0,comp301_seq1,comp321_seq0,comp326_seq1,comp326_seq3,comp340_seq0,comp396_seq0,comp405_seq0,comp428_seq0,comp428_seq1,comp457_seq0,comp492_seq0,comp492_seq4,comp548_seq3,comp587_seq1,comp678_seq2,comp7395_seq1,comp964_seq3,comp984_seq1
GO:0003899	DNA-directed 5'-3' RNA polymerase activi...	49	24	9.82	5.1e-06	0.0009741	2.44399	comp1105_seq1,comp1192_seq0,comp1476_seq0,comp1564_seq0,comp16442_seq1,comp1675_seq1,comp1814_seq0,comp1814_seq1,comp1814_seq2,comp2153_seq0,comp2755_seq11,comp421_seq0,comp421_seq2,comp461_seq0,comp4629_seq0,comp4683_seq0,comp470_seq0,comp5714_seq2,comp5714_seq3,comp5823_seq0,comp831_seq0,comp831_seq1,comp9336_seq0,comp9439_seq2
GO:0034062	5'-3' RNA polymerase activity	49	24	9.82	5.1e-06	0.0009741	2.44399	comp1105_seq1,comp1192_seq0,comp1476_seq0,comp1564_seq0,comp16442_seq1,comp1675_seq1,comp1814_seq0,comp1814_seq1,comp1814_seq2,comp2153_seq0,comp2755_seq11,comp421_seq0,comp421_seq2,comp461_seq0,comp4629_seq0,comp4683_seq0,comp470_seq0,comp5714_seq2,comp5714_seq3,comp5823_seq0,comp831_seq0,comp831_seq1,comp9336_seq0,comp9439_seq2
GO:0097747	RNA polymerase activity	49	24	9.82	5.1e-06	0.0009741	2.44399	comp1105_seq1,comp1192_seq0,comp1476_seq0,comp1564_seq0,comp16442_seq1,comp1675_seq1,comp1814_seq0,comp1814_seq1,comp1814_seq2,comp2153_seq0,comp2755_seq11,comp421_seq0,comp421_seq2,comp461_seq0,comp4629_seq0,comp4683_seq0,comp470_seq0,comp5714_seq2,comp5714_seq3,comp5823_seq0,comp831_seq0,comp831_seq1,comp9336_seq0,comp9439_seq2
GO:0016491	oxidoreductase activity	355	105	71.18	7.5e-06	0.00109143	1.47513	comp1007_seq0,comp1062_seq0,comp1070_seq1,comp1090_seq1,comp1107_seq1,comp114_seq2,comp1163_seq0,comp11954_seq0,comp1252_seq1,comp1318_seq1,comp1361_seq0,comp1376_seq0,comp1376_seq3,comp1389_seq1,comp1496_seq0,comp1567_seq3,comp158_seq0,comp159_seq0,comp1663_seq0,comp1663_seq1,comp1757_seq0,comp1798_seq2,comp1833_seq4,comp18_seq0,comp19_seq3,comp19_seq9,comp214_seq0,comp214_seq1,comp2194_seq0,com…
GO:0008135	translation factor activity, RNA binding	107	41	21.45	8.8e-06	0.00109143	1.91142	comp1152_seq0,comp1201_seq2,comp1201_seq5,comp1239_seq2,comp1256_seq0,comp1272_seq1,comp1522_seq0,comp1595_seq1,comp1615_seq0,comp1640_seq1,comp1771_seq0,comp1771_seq1,comp17_seq0,comp1877_seq0,comp2478_seq1,comp277_seq0,comp2780_seq0,comp302_seq0,comp3287_seq3,comp345_seq0,comp346_seq5,comp373_seq1,comp373_seq2,comp414_seq0,comp4314_seq0,comp4314_seq6,comp453_seq0,comp471_seq0,comp494_seq0,comp5…
GO:0003954	NADH dehydrogenase activity	22	14	4.41	1e-05	0.00109143	3.1746	comp1090_seq1,comp1163_seq0,comp1496_seq0,comp2315_seq0,comp312_seq0,comp439_seq0,comp508_seq0,comp516_seq0,comp516_seq1,comp569_seq0,comp589_seq0,comp617_seq0,comp658_seq0,comp869_seq0
GO:0008137	NADH dehydrogenase (ubiquinone) activity	22	14	4.41	1e-05	0.00109143	3.1746	comp1090_seq1,comp1163_seq0,comp1496_seq0,comp2315_seq0,comp312_seq0,comp439_seq0,comp508_seq0,comp516_seq0,comp516_seq1,comp569_seq0,comp589_seq0,comp617_seq0,comp658_seq0,comp869_seq0
GO:0016655	oxidoreductase activity, acting on NAD(P...	22	14	4.41	1e-05	0.00109143	3.1746	comp1090_seq1,comp1163_seq0,comp1496_seq0,comp2315_seq0,comp312_seq0,comp439_seq0,comp508_seq0,comp516_seq0,comp516_seq1,comp569_seq0,comp589_seq0,comp617_seq0,comp658_seq0,comp869_seq0
GO:0050136	NADH dehydrogenase (quinone) activity	22	14	4.41	1e-05	0.00109143	3.1746	comp1090_seq1,comp1163_seq0,comp1496_seq0,comp2315_seq0,comp312_seq0,comp439_seq0,comp508_seq0,comp516_seq0,comp516_seq1,comp569_seq0,comp589_seq0,comp617_seq0,comp658_seq0,comp869_seq0
GO:0003676	nucleic acid binding	1784	422	357.69	1.1e-05	0.00112053	1.17979	comp1003_seq0,comp10163_seq1,comp10192_seq1,comp10200_seq0,comp10264_seq0,comp1028_seq0,comp1028_seq4,comp1028_seq7,comp10382_seq1,comp1051_seq0,comp105_seq0,comp1105_seq1,comp11103_seq1,comp1116_seq1,comp1116_seq2,comp1116_seq4,comp1133_seq1,comp1146_seq0,comp11470_seq0,comp11516_seq0,comp1152_seq0,comp1158_seq0,comp115_seq2,comp1174_seq1,comp117_seq0,comp1182_seq2,comp11918_seq0,comp1192_seq0,c…
GO:0016651	oxidoreductase activity, acting on NAD(P...	36	19	7.22	1.3e-05	0.0012415	2.63158	comp1090_seq1,comp1163_seq0,comp1496_seq0,comp1757_seq0,comp1798_seq2,comp2315_seq0,comp312_seq0,comp3262_seq1,comp439_seq0,comp508_seq0,comp516_seq0,comp516_seq1,comp569_seq0,comp589_seq0,comp617_seq0,comp621_seq0,comp621_seq1,comp658_seq0,comp869_seq0
GO:0004298	threonine-type endopeptidase activity	20	13	4.01	1.5e-05	0.00127333	3.2419	comp1238_seq0,comp18782_seq1,comp2_seq9,comp425_seq1,comp425_seq2,comp427_seq0,comp511_seq0,comp615_seq0,comp615_seq1,comp626_seq3,comp808_seq0,comp963_seq0,comp978_seq0
GO:0070003	threonine-type peptidase activity	20	13	4.01	1.5e-05	0.00127333	3.2419	comp1238_seq0,comp18782_seq1,comp2_seq9,comp425_seq1,comp425_seq2,comp427_seq0,comp511_seq0,comp615_seq0,comp615_seq1,comp626_seq3,comp808_seq0,comp963_seq0,comp978_seq0
GO:0009055	electron carrier activity	40	19	8.02	8.4e-05	0.00618476	2.36908	comp1252_seq1,comp1499_seq0,comp1798_seq2,comp1833_seq4,comp228_seq0,comp2315_seq0,comp264_seq0,comp2798_seq1,comp2_seq4,comp326_seq1,comp326_seq3,comp3594_seq1,comp405_seq0,comp560_seq1,comp587_seq1,comp621_seq0,comp621_seq1,comp658_seq0,comp7395_seq1
GO:0004864	protein phosphatase inhibitor activity	8	7	1.6	8.5e-05	0.00618476	4.375	comp1516_seq0,comp1516_seq1,comp1516_seq2,comp2621_seq1,comp4604_seq1,comp881_seq0,comp881_seq1
GO:0019212	phosphatase inhibitor activity	8	7	1.6	8.5e-05	0.00618476	4.375	comp1516_seq0,comp1516_seq1,comp1516_seq2,comp2621_seq1,comp4604_seq1,comp881_seq0,comp881_seq1
GO:0003743	translation initiation factor activity	74	28	14.84	0.00029	0.0201418	1.88679	comp1152_seq0,comp1201_seq2,comp1201_seq5,comp1239_seq2,comp1256_seq0,comp1272_seq1,comp1595_seq1,comp1640_seq1,comp1877_seq0,comp2478_seq1,comp277_seq0,comp2780_seq0,comp3287_seq3,comp346_seq5,comp373_seq1,comp373_seq2,comp414_seq0,comp4314_seq0,comp4314_seq6,comp453_seq0,comp471_seq0,comp625_seq0,comp7041_seq0,comp7041_seq2,comp929_seq0,comp948_seq1,comp9749_seq1,comp975_seq0
GO:0019843	rRNA binding	7	6	1.4	0.00037	0.0245809	4.28571	comp105_seq0,comp134_seq0,comp161_seq0,comp1814_seq3,comp3654_seq0,comp94_seq0
GO:0016209	antioxidant activity	26	13	5.21	0.0006	0.0382	2.4952	comp158_seq0,comp159_seq0,comp214_seq0,comp214_seq1,comp3262_seq1,comp4978_seq1,comp5_seq0,comp621_seq0,comp621_seq1,comp655_seq1,comp6857_seq0,comp723_seq1,comp987_seq0
